# Supplementary material for: The genome of the crustacean Parhyale hawaiensis, a model for animal development, regeneration, immunity and lignocellulose digestion
Source: eLife. 2016 Nov 16;5:e20062. doi: 10.7554/eLife.20062 (PMC5111886; doi:10.7554/eLife.20062)
Supplement: Figure 4—source data 1. — Description of repeat content in the Parhyale genome. DOI: http://dx.doi.org/10.7554/eLife.20062.008 [file elife-20062-fig4-data1.xlsx]

## Sheet: Sheet1
Repeat type	bases	% genome	# tags	number of bases
Unknown	935233022	22.0718	32889026	217412412
RC/Helitron3Na_Mam	101451815	2.3943	1408381	14843982
LINE/CR1	83856505	1.97904	1163649	26574062
DNA/TcMar-Tc1	68800466	1.62371	1097485	19260914
LINE/CR1-Zenon	66234301	1.56315	913541	22571609
LINE/Penelope	37792370	0.891912	383764	8122950
LINE/Jockey	26618441	0.628204	1003441	10181920
LINE/L2	26279152	0.620197	296593	7231295
Simple_repeat	20105314	0.474492	138709	2450699
DNA	19850762	0.468484	563621	4504002
DNA/hAT	19004903	0.448522	122935	3020093
DNA/TcMar-Mariner	17929117	0.423133	332566	4016488
LINE/I	17212473	0.40622	1045699	10060579
LINE/Proto2	16193628	0.382175	178252	4102078
short	14614446	0.344906	0	0
LTR/Gypsy	12002252	0.283257	270335	5307125
LINE/Dong-R4	8950083	0.211225	67028	2889126
DNA/hAT-Tip100	7315075	0.172638	45153	1657740
DNA/Maverick	6431581	0.151787	33601	2554784
LINE/RTE-BovB	6330019	0.149391	55334	1661551
DNA/hAT-Charlie	5638368	0.133067	244675	1165914
LTR/Pao	5340240	0.126031	24397	1496645
DNA/hAT-Tag1	4452813	0.105088	69971	1287416
Satellite	4372776	0.103199	234115	2164104
DNA/MER44A	4084747	0.0964014	37865	707090
DNA/MULE-MuDR	4001542	0.0944377	72515	742631
LINE/I-Nimb	3722118	0.0878432	114096	2022292
DNA/CMC-Chapaev-3	3471760	0.0819347	80844	556876
DNA/TcMar-Tigger	3211307	0.0757879	46944	588020
DNA/hAT-Ac	3078352	0.0726501	128451	1174197
LINE/RTE-X	2744437	0.0647696	22085	1137235
DNA/Ginger	2580371	0.0608976	44607	611435
DNA/CMC-EnSpm	2203524	0.0520039	14062	535386
LTR/Copia	1734822	0.0409424	11660	626602
DNA/P	1562840	0.0368835	33717	410739
LINE	1513129	0.0357103	14007	506116
LTR/DIRS	1446892	0.0341471	445125	1017888
DNA/PIF-Harbinger	1298397	0.0306426	28009	390000
DNA/hAT-Blackjack	1148525	0.0271056	35677	261406
DNA/hAT-hAT5	1141398	0.0269374	76288	598844
DNA/hAT-Tol2	1107684	0.0261417	4743	163772
DNA/Tigger7	1074729	0.025364	11617	519733
DNA/hAT-hATm	1068486	0.0252166	14477	162618
DNA/Merlin	936885	0.0221108	12915	103981
tRNA/tRNA-Tyr-TAC	798129	0.0188361	11056	70914
A-rich	784194	0.0185072	0	0
DNA/CMC-Chapaev	630495	0.0148799	10328	48023
DNA/Academ	574063	0.0135481	1046	81771
LINE/L1-Tx1	524451	0.0123772	547	44765
DNA/Sola	494505	0.0116705	16971	181976
DNA/MuLE-MuDR	483236	0.0114045	4024	145202
DNA/hAT-hATx	453462	0.0107019	4520	40765
DNA/TcMar-Stowaway	453269	0.0106973	22499	78386
DNA/TcMar-m44	419014	0.00988887	7743	81518
DNA/hAT-hobo	411985	0.00972298	3421	125269
DNA/PiggyBac	411256	0.00970578	3826	120442
SINE/AluSg4	362484	0.00855474	33966	72604
LTR	330040	0.00778905	6205	100873
DNA/TcMar-Fot1	324492	0.00765812	6739	103615
LINE/DRE	319010	0.00752874	1348	38563
GA-rich	225142	0.00531343	0	0
LINE/CRE-II	209268	0.00493879	1539	46786
LTR/ERVL	158220	0.00373404	492	13662
DNA/TcMar-ISRm11	118126	0.00278781	499	29284
G-rich	64962	0.00153312	0	0
