# Supplementary material for: The genome of the crustacean Parhyale hawaiensis, a model for animal development, regeneration, immunity and lignocellulose digestion
Source: eLife. 2016 Nov 16;5:e20062. doi: 10.7554/eLife.20062 (PMC5111886; doi:10.7554/eLife.20062)
Supplement: Figure 4—source data 2. — List of programs and bioinformatic tools and publicly available sequence data used in this study. DOI: http://dx.doi.org/10.7554/eLife.20062.009 [file elife-20062-fig4-data2.xlsx]

## Sheet: Sheet1
Software	Used in	Citation
Trimmomatic 0.32	Trimming pair-end libraries	DOI: 10.1093/bioinformatics/btu170
NextClip 1.31	Clipping mate-pair libraries	DOI: 10.1093/bioinformatics/btt702
Abyss 1.9.0	Assembling contigs	DOI: 10.1101/gr.089532.108
GAM-NGS Nov 5th, 2014	Merging two contig assemblies	DOI: 10.1186/1471-2105-14-S7-S6
SSPACE Standard 3.0	Scaffolding contigs	DOI: 10.1093/bioinformatics/btq683
BWA 0.7.12	Mapping reads to contigs	DOI: 10.1093/bioinformatics/btp324
L_RNA scaffolder	Scaffolding contigs according to transcripts	DOI: 10.1186/1471-2164-14-604
Trinity (version trinityrnaseq_r20140413)	Assembling RNA-seq reads	DOI: 10.1038/nbt.1883
Augustus 3.1	Gene prediction	DOI: 10.1093/nar/gkh379
GMAP 2014-07-16	Mapping transcripts to genome	DOI: 10.1093/bioinformatics/bti310
GeneMark 4.21	Ab initio gene prediction	DOI: 10.1101/gr.081612.108
SNAP 2006-07-28	Ab initio gene prediction	DOI: 10.1186/1471-2105-5-59
EvienceModeler 2012-06-25	Gene prediction	DOI: 10.1186/gb-2008-9-1-r7
PASA 2.02	Consolidated transcript mapping	DOI: 10.1093/nar/gkg770
RepeatMasker 4.05	Mask repetitive regions in genome	Smit, AFA, Hubley, R & Green, P. RepeatMasker Open-4.0. 2013-2015 <http://www.repeatmasker.org>.
RepeatModeler 1.08	Model potential repetitive regions in genome	Smit, AFA, Hubley, R. RepeatModeler Open-1.0. 2008-2015 <http://www.repeatmasker.org>
Cutadapt	Removes adapter sequences	DOI: http://dx.doi.org/10.14806/ej.17.1.200
Rfam (version 12)	Non-coding RNA prediction	DOI: 10.1093/nar/gku1063
Infernal (version 1.1.1)	RNA homology search using HMM methods	DOI: 10.1093/bioinformatics/btt509.
miRPara (version 6.3)	miRNA prediction	DOI: 10.1186/1471-2105-12-107
Data	Source	Citation
Litopenaeus vannamei transcriptome	http://oaktrust.library.tamu.edu/handle/1969.1/152151	DOI:10.1038/srep07081
Echinogammarus veneris, Eucyclops serrulatus transcriptome	http://datadryad.org/resource/doi:10.5061/dryad.0h584	DOI: 10.1111/1755-0998.12368
Calanus finmarchicus transcriptome	NCBI BioProject PRJNA236528	DOI: 10.1371/journal.pone.0088589
Hypsibius dujardini proteome	http://badger.bio.ed.ac.uk/H_dujardini/home/download	DOI: http://dx.doi.org/10.1101/033464
All other proteomes (EBI RELEASE 2015_04)	http://www.ebi.ac.uk/reference_proteomes	NA
Uniprot database (release 2015_08)	http://www.uniprot.org/	NA
P. hawaiensis BAC sequences	NCBI (accessions in the cited paper)	DOI:10.1016/j.ydbio.2015.10.029
KEGG database (Release 75.1, September 1, 2015)	http://www.genome.jp/kegg/	DOI: 10.1093/nar/gkv1070
ImmunoDB	http://cegg.unige.ch/Insecta/immunodb	DOI: 10.1126/science.1139862
miRBase	http://mirbase.org/	DOI: 10.1093/nar/gkt1181
Parhyale hawaiensis microRNA dataset	http://www.ebi.ac.uk/ena/data/view/ERP001160	DOI: 10.1371/journal.pone.0033784
