# Supplementary material for: The genome of the crustacean Parhyale hawaiensis, a model for animal development, regeneration, immunity and lignocellulose digestion
Source: eLife. 2016 Nov 16;5:e20062. doi: 10.7554/eLife.20062 (PMC5111886; doi:10.7554/eLife.20062)
Supplement: Figure 6—source data 1. — Description of polymorphism in previously identfied Parhyale developmental genes. DOI: http://dx.doi.org/10.7554/eLife.20062.018 [file elife-20062-fig6-data1.xlsx]

## Sheet: Dev and hox genes
Developmental genes	GenBank/ Transcriptome ID	Length (bp)	Identity between CDS and genome	Number of contigs per exon	SNP (bp)	Indel (bp)	Frameshift	Synonymous substitution	Non-synonymous substution
Extradenticle	AM850853	516	0.99	1	1	-	-	1	-
Knirps1	KC808167	1194	0.99	2	10	-	-	10	-
Knirps2	JQ841041	2079	0.99	1	4	-	-	1	3
Snail1	JN858902	1323	0.99	2	7	-	-	6	1
Snail2	JN858903	730	0.99	2	10	-	-	7	3
Snail3	JN858904	459	1	1	0	-	-	-	-
Twist	DQ827719	879	0.98	2	17	-	-	11	6
Delta	DQ917570	2496	0.99	2	19	6 (insertion)	-	17	2
Notch	DQ917572	7469	0.99	2	58	-	-	50	8
Odd-skipped2	DQ917573	855	0.99	2	7	-	-	5	2
Nanos	EU289288	1710	0.96	2	78	6 (deletion)	-	44	34
Vasa	EU289291	2040	0.98	2	37	6 (insertion)	-	30	7
Beta-catenin	EU726765	2577	0.99	1	6	-	-	4	2
Optix	EU908055	1633	0.98	2	40	-	-	28	12
Distalless	FJ617569 and transcriptome	1179	0.99	1	11	-	-	11	-
Collier	FN557064	1506	0.99	2	17	3 (insertion)	-	14	3
Sp1-4	FN562991	2400	0.98	2	42	-	-	36	6
Sp6-9	FN562992	1383	0.99	2	20	-	-	20	-
Short gastrulation protein	HM191474	2991	0.99	2	49	-	-	40	9
Hedgehog	HM347084	1620	0.99	2	28	-	-	15	13
Pax3/7-1	HM347085	1461	0.99	2	19	3 (insertion)	-	17	2
Scratch	JN858901	873	0.99	2	8	-	-	8	-
Cap-n-collar	KP129110	575	0.98	2	9	-	-	8	1
Homothorax	AM850852 and transcriptome	1317	0.99	2	4	-	-	4	-
Prospero	HM191476 and transcriptome	2940	0.97	2	16	-	-	15	1
Scalloped protein	FN256248	979	0.99	2	10	-	-	7	3
Single-minded	HM191473	1795	0.98	2	39	3 (insertion)	-	31	8
Suppressor of hairless	DQ917571	474	0.99	2	2	-	-	2	-
Orthodenticle	transcriptome	1191	0.99	2	15	-	-	15	-
Dachshund	transcriptome	2412	0.99	2	15	-	-	12	3
Hox Genes	GenBank ID	Length (bp)	Identity between CDS and genome	Number of contigs per exon	SNP (bp)	Indel (bp)	Frameshift	Synonymous substitution	Non-synonymous substution
Abdominal-A	JQ952572	990	0.99	2	2	-	-	2	-
Abdominal-B	JQ952575	1101	1	1	0	-	-	-	-
Antennapedia	JQ952581	1145	0.98	2	14	6 (insertion)	-	11	3
Deformed	JQ952571	1122	0.99	2	19	3 (deletion)	-	17	2
Hox3	JQ845948	275	0.99	2	2	-	-	2	-
Labial	JQ952576	1095	0.99	1	3	-	-	3	-
Proboscipedia	JQ952587	285	1	1	0	-	-	-	-
Sex-combs reduced	JQ952579	1028	1	1	0	-	-	-	-
Ultrabithorax	FJ628448	906	0.99	1	3	-	-	2	1
