# Supplementary material for: The genome of the crustacean Parhyale hawaiensis, a model for animal development, regeneration, immunity and lignocellulose digestion
Source: eLife. 2016 Nov 16;5:e20062. doi: 10.7554/eLife.20062 (PMC5111886; doi:10.7554/eLife.20062)
Supplement: Figure 8—source data 1. — List of Parhyale transcript IDs for all transcription factors in the proteome, grouped by transcription factor family. DOI: http://dx.doi.org/10.7554/eLife.20062.023 [file elife-20062-fig8-data1.xlsx]

## Sheet: Sheet1
Domains	Number of proteins	Protein IDs
zf-C2H2	699	phaw_30_tra_m.005310,phaw_30_tra_m.005099,phaw_30_tra_m.019677,phaw_30_tra_m.006889,phaw_30_tra_m.023064,phaw_30_tra_m.013824,phaw_30_tra_m.013989,phaw_30_tra_m.005091,phaw_30_tra_m.023848,phaw_30_tra_m.019474,phaw_30_tra_m.003008,phaw_30_tra_m.003887,phaw_30_tra_m.022874,phaw_30_tra_m.024391,phaw_30_tra_m.024393,phaw_30_tra_m.011102,phaw_30_tra_m.008007,phaw_30_tra_m.013821,phaw_30_tra_m.015679,…
Homeobox	95	phaw_30_tra_m.007593,phaw_30_tra_m.024253,phaw_30_tra_m.020904,phaw_30_tra_m.026640,phaw_30_tra_m.024534,phaw_30_tra_m.024538,phaw_30_tra_m.021711,phaw_30_tra_m.015304,phaw_30_tra_m.021487,phaw_30_aug_m.028398,phaw_30_tra_m.001685,phaw_30_tra_m.013007,phaw_30_tra_m.012655,phaw_30_tra_m.004993,phaw_30_tra_m.020753,phaw_30_tra_m.018339,phaw_30_tra_m.023028,phaw_30_tra_m.019965,phaw_30_tra_m.021508,…
HLH	61	phaw_30_tra_m.007172,phaw_30_tra_m.023201,phaw_30_tra_m.010848,phaw_30_tra_m.021746,phaw_30_aug_m.027719,phaw_30_tra_m.023724,phaw_30_tra_m.009836,phaw_30_tra_m.008407,phaw_30_tra_m.003988,phaw_30_tra_m.014521,phaw_30_tra_m.013172,phaw_30_tra_m.019440,phaw_30_tra_m.006918,phaw_30_tra_m.008833,phaw_30_tra_m.023579,phaw_30_tra_m.007040,phaw_30_aug_m.027373,phaw_30_tra_m.018264,phaw_30_tra_m.010335,…
zf-C4	24	phaw_30_aug_m.028071,phaw_30_tra_m.021417,phaw_30_tra_m.000064,phaw_30_tra_m.019084,phaw_30_aug_m.027027,phaw_30_tra_m.004148,phaw_30_tra_m.002821,phaw_30_tra_m.020674,phaw_30_tra_m.003450,phaw_30_tra_m.021251,phaw_30_tra_m.010749,phaw_30_tra_m.003740,phaw_30_tra_m.018129,phaw_30_tra_m.014688,phaw_30_tra_m.011234,phaw_30_tra_m.023487,phaw_30_tra_m.007594,phaw_30_tra_m.024082,phaw_30_tra_m.015401,…
HTH_psq	18	phaw_30_tra_m.014358,phaw_30_tra_m.007545,phaw_30_tra_m.002109,phaw_30_tra_m.002108,phaw_30_tra_m.026594,phaw_30_tra_m.015428,phaw_30_tra_m.012600,phaw_30_tra_m.024660,phaw_30_tra_m.021729,phaw_30_tra_m.025521,phaw_30_tra_m.020738,phaw_30_tra_m.015444,phaw_30_tra_m.018076,phaw_30_tra_m.024608,phaw_30_tra_m.005600,phaw_30_tra_m.018199,phaw_30_tra_m.002500,phaw_30_tra_m.009779
Fork_head	18	phaw_30_aug_m.028558,phaw_30_tra_m.003516,phaw_30_tra_m.026667,phaw_30_tra_m.021102,phaw_30_tra_m.007636,phaw_30_tra_m.015598,phaw_30_tra_m.021309,phaw_30_tra_m.025785,phaw_30_tra_m.008632,phaw_30_tra_m.000790,phaw_30_tra_m.018965,phaw_30_tra_m.011181,phaw_30_tra_m.020734,phaw_30_tra_m.024071,phaw_30_tra_m.000906,phaw_30_tra_m.017663,phaw_30_tra_m.011819,phaw_30_tra_m.021532
Ets	15	phaw_30_tra_m.019119,phaw_30_tra_m.018557,phaw_30_tra_m.022684,phaw_30_tra_m.020157,phaw_30_tra_m.024027,phaw_30_aug_m.026991,phaw_30_tra_m.020941,phaw_30_tra_m.008414,phaw_30_aug_m.027976,phaw_30_tra_m.022066,phaw_30_tra_m.018383,phaw_30_tra_m.004649,phaw_30_tra_m.014464,phaw_30_tra_m.014038,phaw_30_tra_m.023811
GATA	11	phaw_30_tra_m.014636,phaw_30_tra_m.024493,phaw_30_aug_m.027339,phaw_30_aug_m.028040,phaw_30_tra_m.019654,phaw_30_aug_m.027464,phaw_30_tra_m.013167,phaw_30_tra_m.015112,phaw_30_tra_m.021813,phaw_30_tra_m.018116,phaw_30_tra_m.006452
DM	10	phaw_30_aug_m.027033,phaw_30_tra_m.018953,phaw_30_aug_m.026829,phaw_30_tra_m.024296,phaw_30_tra_m.020630,phaw_30_tra_m.005154,phaw_30_tra_m.009463,phaw_30_tra_m.016130,phaw_30_tra_m.013563,phaw_30_tra_m.011028
BESS	10	phaw_30_tra_m.020562,phaw_30_tra_m.005062,phaw_30_tra_m.012838,phaw_30_tra_m.001657,phaw_30_tra_m.025812,phaw_30_tra_m.014418,phaw_30_tra_m.008394,phaw_30_tra_u.021177,phaw_30_tra_m.015140,phaw_30_tra_m.009968
bZIP_1,bZIP_2	8	phaw_30_tra_m.023720,phaw_30_tra_m.000231,phaw_30_tra_m.021028,phaw_30_tra_m.006951,phaw_30_tra_m.024523,phaw_30_tra_m.011942,phaw_30_tra_m.012458,phaw_30_tra_m.000076
bZIP_2	8	phaw_30_tra_m.014746,phaw_30_tra_m.019467,phaw_30_tra_m.022142,phaw_30_tra_m.025294,phaw_30_tra_m.002165,phaw_30_tra_m.015363,phaw_30_tra_m.007843,phaw_30_tra_m.018926
PAX	7	phaw_30_aug_m.028373,phaw_30_aug_m.027335,phaw_30_tra_m.025704,phaw_30_tra_m.010730,phaw_30_tra_m.015655,phaw_30_tra_m.023326,phaw_30_tra_m.011101
CSD	5	phaw_30_tra_m.014537,phaw_30_tra_m.004096,phaw_30_tra_m.018176,phaw_30_tra_m.011179,phaw_30_tra_m.018549
T-box	5	phaw_30_tra_m.021474,phaw_30_tra_m.018494,phaw_30_tra_m.003326,phaw_30_tra_m.017752,phaw_30_tra_m.020096
zf-GRF	4	phaw_30_tra_m.010010,phaw_30_tra_u.016544,phaw_30_tra_m.018898,phaw_30_tra_m.023764
zf-BED	4	phaw_30_tra_m.017815,phaw_30_tra_m.001451,phaw_30_tra_m.001974,phaw_30_tra_m.025328
zf-TAZ	4	phaw_30_tra_m.003989,phaw_30_tra_m.000714,phaw_30_tra_m.003990,phaw_30_tra_m.018772
RHD	4	phaw_30_tra_m.001338,phaw_30_tra_m.014117,phaw_30_tra_m.007213,phaw_30_tra_m.003831
Homeobox,Pou	4	phaw_30_tra_m.025480,phaw_30_tra_m.004798,phaw_30_tra_m.010642,phaw_30_tra_m.019762
RFX_DNA_binding	3	phaw_30_tra_m.001764,phaw_30_tra_m.014948,phaw_30_tra_m.014550
Homeobox,PAX	3	phaw_30_tra_m.006177,phaw_30_tra_m.018089,phaw_30_tra_m.017719
zf-A20	3	phaw_30_tra_m.000119,phaw_30_tra_m.022389,phaw_30_tra_m.024251
DDT	3	phaw_30_tra_m.003554,phaw_30_tra_m.010093,phaw_30_tra_m.003235
zf-C2HC	3	phaw_30_tra_m.018015,phaw_30_tra_m.011649,phaw_30_tra_m.022792
Runt	3	phaw_30_tra_m.018700,phaw_30_tra_m.015430,phaw_30_tra_m.018740
E2F_TDP	3	phaw_30_tra_m.006795,phaw_30_tra_m.020534,phaw_30_tra_m.014195
bZIP_Maf	3	phaw_30_tra_m.017708,phaw_30_tra_m.017487,phaw_30_tra_m.007056
CP2	2	phaw_30_tra_m.014915,phaw_30_tra_m.023142
zf-MIZ	2	phaw_30_tra_m.020432,phaw_30_tra_m.014106
CUT	2	phaw_30_aug_m.027549,phaw_30_aug_m.027946
bZIP_1	2	phaw_30_tra_m.004498,phaw_30_tra_m.006383
P53	2	phaw_30_tra_m.012103,phaw_30_tra_m.018108
CUT,Homeobox	2	phaw_30_tra_m.024522,phaw_30_tra_m.022696
bZIP_1,bZIP_2,bZIP_Maf	2	phaw_30_tra_m.000771,phaw_30_tra_u.007968
Homeobox,zf-C2H2	2	phaw_30_tra_m.000369,phaw_30_tra_m.022027
SRF-TF	2	phaw_30_tra_m.010910,phaw_30_tra_m.010571
CG-1	1	phaw_30_tra_m.022721
GCM	1	phaw_30_tra_m.010967
YL1	1	phaw_30_tra_m.023856
Not1	1	phaw_30_tra_m.018102
HPD	1	phaw_30_tra_m.021946
zf-C5HC2	1	phaw_30_tra_m.020857
TEA	1	phaw_30_tra_m.015044
NDT80_PhoG	1	phaw_30_tra_m.014940
STAT_bind	1	phaw_30_tra_m.017679
TF_AP-2	1	phaw_30_tra_m.019838
SART-1	1	phaw_30_tra_m.012592
CBFB_NFYA	1	phaw_30_tra_m.022095
HTH_3	1	phaw_30_tra_m.000165
bZIP_1,bZIP_Maf	1	phaw_30_tra_m.019483
GCN5L1	1	phaw_30_tra_m.024561
HSF_DNA-bind	1	phaw_30_tra_m.000795
zf-NF-X1	1	phaw_30_tra_m.018888
