# Supplementary material for: The genome of the crustacean Parhyale hawaiensis, a model for animal development, regeneration, immunity and lignocellulose digestion
Source: eLife. 2016 Nov 16;5:e20062. doi: 10.7554/eLife.20062 (PMC5111886; doi:10.7554/eLife.20062)
Supplement: Figure 8—source data 2. — Parhyale transcript IDs for Wnt, Wnt ligand, FGF, FGFR and TGFβ pathway genes. DOI: http://dx.doi.org/10.7554/eLife.20062.024 [file elife-20062-fig8-data2.xlsx]

## Sheet: Sheet1
WNT pathway genes
Gene name	P. hawaiensis gene ID
Wnt1/wingless	phaw_30_tra_m.012090
Wnt4	phaw_30_tra_m.015031
Wnt5	phaw_30_tra_m.023054
Wnt10	phaw_30_tra_m.022810
Wnt11	phaw_30_tra_m.015031
Wnt16	phaw_30_tra_m.021731
Wntless	phaw_30_tra_m.024123
Wnt losses - 7 wnt subfamilies absent
Wnt2/13, wnt3, wnt6, wnt7, wnt8, wnt9/14/15, wntA
WNT ligands (Frizzled and secreted frizzled related proteins)
Gene name	P. hawaiensis gene ID
Secreted frizzled related protein 5	phaw_30_tra_m.004185
Frizzled-10	phaw_30_tra_m.012884
Frizzled-8	phaw_30_tra_m.013818
Frizzled-2/7	phaw_30_tra_m.014673
Frizzled-1	phaw_30_tra_m.016235
FGF receptors (FGFR)
Gene name	P. hawaiensis gene ID
FGFR-1	phaw_30_tra_m.004273
FGF genes
Gene name	P. hawaiensis gene ID
FGF1	phaw_30_tra_m.005461
FGF6	phaw_30_tra_m.021778
TGF beta siganlling pathway
Gene name	P. hawaiensis gene ID
Inhibin beta	phaw_30_tra_m.000330
Inhibin beta	phaw_30_tra_m.001465
TGFB receptor 1	phaw_30_tra_m.019516
activin receptor 1	phaw_30_tra_m.010182
myostatin	phaw_30_tra_m.021826
decapentaplegic	phaw_30_tra_m.011692
BMP4	phaw_30_tra_m.001734
BMP7	phaw_30_tra_m.002537
BMP receptor type 1B	phaw_30_tra_m.006547
BMP receptor type 2	phaw_30_tra_m.023078
BMP7- like	phaw_30_tra_m.022852
BMP10	phaw_30_tra_m.021422
NBL1	phaw_30_tra_m.023522
