# Supplementary material for: The genome of the crustacean Parhyale hawaiensis, a model for animal development, regeneration, immunity and lignocellulose digestion
Source: eLife. 2016 Nov 16;5:e20062. doi: 10.7554/eLife.20062 (PMC5111886; doi:10.7554/eLife.20062)
Supplement: Figure 8—source data 3. — Annotation of homeobox transcription factor genes in Parhyale. DOI: http://dx.doi.org/10.7554/eLife.20062.025 [file elife-20062-fig8-data3.xlsx]

## Sheet: Sheet1
SINE	Families
phaw_30_aug_m.027676	SIX3
phaw_30_tra_m.018595	SIX3
phaw_30_tra_m.019860	SIX1
phaw_30_tra_m.024534	SIX4/5
ANTP NKL subclass
phaw_30_aug_m.028115	BARH
phaw_30_tra_m.001246	BARH
phaw_30_tra_m.002614	BARH
phaw_30_tra_m.019965	BARH1
phaw_30_aug_m.027926	BARH2
phaw_30_tra_m.013058	BSX
phaw_30_aug_m.027617	DBX
phaw_30_tra_m.011711	DBX
phaw_30_tra_m.020471	DLX
phaw_30_tra_m.018171	EMX
phaw_30_tra_m.012676	EMX
phaw_30_tra_m.019606	EN
phaw_30_tra_m.018778	EN
phaw_30_tra_m.004416	HLX
phaw_30_tra_m.013515	HMX
phaw_30_tra_m.021487	LBX
phaw_30_tra_m.024253	LBX
phaw_30_tra_m.011587	MSX
phaw_30_tra_m.015760	MSX
phaw_30_aug_m.027765	MSX
phaw_30_tra_m.005430	MSX
phaw_30_aug_m.027861	MSX
phaw_30_tra_m.014042	MSX
phaw_30_aug_m.028366	MSX2
phaw_30_tra_m.005408	NK1
phaw_30_tra_m.010393	NK2
phaw_30_tra_m.000502	NK2
phaw_30_tra_m.019611	NK2
phaw_30_aug_m.027905	NK2.1
phaw_30_tra_m.001685	NK2.3
phaw_30_tra_m.000879	NK3
phaw_30_tra_m.007609	NK7
phaw_30_tra_m.023028	TLX
phaw_30_tra_m.023242	TLX
phaw_30_tra_m.015491	VAX
phaw_30_aug_m.027698	VAX
PRD
phaw_30_aug_m.027657	ARX
phaw_30_tra_m.021711	ARX
phaw_30_tra_m.021508	ARX
phaw_30_aug_m.027522	ARX
phaw_30_tra_m.000105	ARX
phaw_30_tra_m.005832	GSC
phaw_30_tra_m.007593	HBN
phaw_30_tra_m.024694	OTP
phaw_30_tra_m.014549	OTX
phaw_30_tra_m.002258	OTX
phaw_30_aug_m.027586	OTX
phaw_30_aug_m.027612	OTX
phaw_30_tra_m.018078	PAX3
phaw_30_tra_m.018089	PAX3/7
phaw_30_tra_m.010730	PAX3/7
phaw_30_tra_m.004993	PAX4/6
phaw_30_aug_m.028166	PAX6
phaw_30_tra_m.006177	PAX6
phaw_30_tra_m.016118	PAX6
phaw_30_tra_m.017719	PAX7
phaw_30_aug_m.028112	PAX7
phaw_30_aug_m.027335	PAX9
phaw_30_tra_m.019980	PITX
phaw_30_tra_m.015304	PITX
phaw_30_tra_m.012655	PRRX
phaw_30_tra_m.000227	PRRX
phaw_30_tra_m.009739	RX
phaw_30_tra_m.018601	RX
phaw_30_tra_m.014162	UNCX
phaw_30_tra_m.016662	SHOX
phaw_30_aug_m.027475	SHOX
POU
phaw_30_tra_m.010642	POU6
phaw_30_tra_m.019762	POU
phaw_30_tra_m.025480	POU
phaw_30_tra_m.004798	POU
LIM
phaw_30_aug_m.028022	LHX2
phaw_30_tra_m.020753	LHX3
phaw_30_tra_m.018339	LHX
phaw_30_tra_m.001034	LHX2
phaw_30_tra_m.018587	LHX1
phaw_30_tra_m.004304	LHX
phaw_30_tra_m.023650	LHX1
phaw_30_tra_m.014981	LHX
phaw_30_aug_m.028284	LHX1
phaw_30_tra_m.024925	ISL1
TALE
phaw_30_tra_m.023125	IRX
phaw_30_tra_m.023126	IRX
phaw_30_aug_m.028398	IRX
phaw_30_tra_m.006380	MEIS
phaw_30_tra_m.022108	MKX
phaw_30_tra_m.010457	PBX
phaw_30_tra_m.003830	TGIF
ZF
phaw_30_tra_m.018601	ZAG
phaw_30_tra_m.000369	ZFH4
phaw_30_tra_m.003587	ZFH4
CUT
phaw_30_tra_m.024522	ONECUT
PROS
phaw_30_tra_m.021946	PROS
CERS
phaw_30_tra_m.023117	CERS6
phaw_30_tra_m.017693	CERS6
phaw_30_tra_m.007464	CERS6
phaw_30_tra_m.019737	CERS6
phaw_30_tra_m.020648	CERS1/LAG1
phaw_30_tra_m.017794	CERS6
phaw_30_tra_m.004908	CERS6
phaw_30_tra_m.022323	CERS6
phaw_30_tra_m.014206	CERS1/LAG1
phaw_30_tra_m.011639	CERS6
phaw_30_tra_m.004583	CERS6
phaw_30_tra_m.000422	CERS6
ANTP HOXL subclass
phaw_30_tra_m.013007	CDX
phaw_30_aug_m.027237	CDX
phaw_30_tra_m.011620	EVX
phaw_30_tra_m.012186	EVX
phaw_30_tra_m.001662	EVX
phaw_30_tra_m.004495	GSX
phaw_30_tra_m.010963	HOX1 (labial)
phaw_30_tra_m.012068	HOX2 (proboscipedia)
phaw_30_tra_m.002455	HOX3
phaw_30_tra_m.002006	HOX4 (deformed)
phaw_30_aug_m.026832	HOX5 (scr)
phaw_30_tra_m.004428	HOX6-8 (antp) in same large transcript assembly with ubx
phaw_30_tra_m.004428	HOX6-8 (ubx)
phaw_30_tra_m.021966	HOX6-8 (abda)
phaw_30_tra_m.019412	HOX9-13 (abdb)
phaw_30_aug_m.028013	MEOX
phaw_30_tra_m.026640	MNX
