# Supplementary material for: The genome of the crustacean Parhyale hawaiensis, a model for animal development, regeneration, immunity and lignocellulose digestion
Source: eLife. 2016 Nov 16;5:e20062. doi: 10.7554/eLife.20062 (PMC5111886; doi:10.7554/eLife.20062)
Supplement: Figure 12—source data 1.﻿ — IDs of all Parhyale GH genes and analyis of GH family membership across available malacostracan data sets. DOI: http://dx.doi.org/10.7554/eLife.20062.032 [file elife-20062-fig12-data1.xlsx]

## Sheet: Sheet1
P. hawaiensis GH gene IDs
Family	Phaw ID
Glyco_hydro_47	phaw_30_tra_m.021775
Glyco_hydro_47	phaw_30_tra_m.021800
Glyco_hydro_2_C	phaw_30_tra_m.021982
Glyco_hydro_2_N	phaw_30_tra_m.021982
Glyco_hydro_2	phaw_30_tra_m.021982
Glyco_hydro_2_C	phaw_30_tra_m.021983
Glyco_hydro_2_N	phaw_30_tra_m.021983
Glyco_hydro_2	phaw_30_tra_m.021983
Glyco_hydro_38	phaw_30_tra_m.022795
Glyco_hydro_38C	phaw_30_tra_m.022795
Glyco_hydro_9	phaw_30_tra_m.023317
Glyco_hydro_31	phaw_30_tra_m.023788
Glyco_hydro_15	phaw_30_tra_m.024429
Glyco_hydro_56	phaw_30_tra_m.025230
Glyco_hydro_18	phaw_30_aug_m.026866
Glyco_hydro_31	phaw_30_aug_m.027374
Glyco_hydro_9	phaw_30_aug_m.028129
Glyco_hydro_18	phaw_30_tra_m.000008
Glyco_hydro_18	phaw_30_tra_m.000008
Glyco_hydro_18	phaw_30_tra_m.000166
Glyco_hydro_30	phaw_30_tra_m.000424
Glyco_hydro_18	phaw_30_tra_m.000426
Glyco_hydro_30	phaw_30_tra_m.000910
Glyco_hydro_7	phaw_30_tra_m.001645
Glyco_hydro_20	phaw_30_tra_m.001656
Glyco_hydro_7	phaw_30_tra_m.001919
Glyco_hydro_30	phaw_30_tra_m.002226
Glyco_hydro_18	phaw_30_tra_m.002914
Glyco_hydro_18	phaw_30_tra_m.003755
Glyco_hydro_18	phaw_30_tra_m.003755
Glyco_hydro_2_N	phaw_30_tra_m.004004
Glyco_hydro_2	phaw_30_tra_m.004004
Glyco_hydro_20	phaw_30_tra_m.004256
Glyco_hydro_47	phaw_30_tra_m.004388
Glyco_hydro_30	phaw_30_tra_m.004590
Glyco_hydro_15	phaw_30_tra_m.004644
Glyco_hydro_30	phaw_30_tra_m.004670
Glyco_hydro_30	phaw_30_tra_m.004919
Glyco_hydro_18	phaw_30_tra_m.006040
Glyco_hydro_20	phaw_30_tra_m.006745
Glyco_hydro_38	phaw_30_tra_m.007709
Glyco_hydro_38C	phaw_30_tra_m.007709
Glyco_hydro_35	phaw_30_tra_m.009313
Glyco_hydro_18	phaw_30_tra_m.010417
Glyco_hydro_31	phaw_30_tra_m.010583
Glyco_hydro_35	phaw_30_tra_m.010729
Glyco_hydro_9	phaw_30_tra_m.010785
Glyco_hydro_35	phaw_30_tra_m.011282
Glyco_hydro_31	phaw_30_tra_m.011441
Glyco_hydro_31	phaw_30_tra_m.012219
Glyco_hydro_63	phaw_30_tra_m.012709
Glyco_hydro_20	phaw_30_tra_m.012773
Glyco_hydro_18	phaw_30_tra_m.012871
Glyco_hydro_18	phaw_30_tra_m.012936
Glyco_hydro_18	phaw_30_tra_m.014085
Glyco_hydro_38	phaw_30_tra_m.014194
Glyco_hydro_38C	phaw_30_tra_m.014194
Glyco_hydro_18	phaw_30_tra_m.014291
Glyco_hydro_30	phaw_30_tra_m.014880
Glyco_hydro_47	phaw_30_tra_m.015203
Glyco_hydro_7	phaw_30_tra_m.015209
Glyco_hydro_31	phaw_30_tra_m.015318
Glyco_hydro_20	phaw_30_tra_m.015372
Glyco_hydro_18	phaw_30_tra_m.017458
Glyco_hydro_38C	phaw_30_tra_m.017610
Glyco_hydro_35	phaw_30_tra_m.017919
Glyco_hydro_47	phaw_30_tra_m.018132
Glyco_hydro_18	phaw_30_tra_m.019436
Glyco_hydro_18	phaw_30_tra_m.019436
Glyco_hydro_38	phaw_30_tra_m.020386
Glyco_hydro_38C	phaw_30_tra_m.020386
Glyco_hydro_28	phaw_30_tra_u.020701
Glyco_hydro_18	phaw_30_tra_m.020989
	Echinogammarus veneris (malacostraca)	Eucyclops serrulatus (copepod)	Calanus finmarchicus (copepod)	Parhyale hawaiensis (malacostraca)	Daphnia pulex (Branchipod)	Litopenaeus vannamei (malacostraca)
GH65m	0	0	1	0	1	0
GH20b	0	0	1	0	1	0
GH81	0	0	1	0	0	0
GH85	0	1	1	0	1	1
GH25	0	1	0	0	0	0
GH38C	0	4	6	5	7	6
GH20	1	3	10	5	5	6
GH47	0	6	14	5	6	15
GH28	0	0	0	1	0	0
GH43	0	1	10	0	0	0
GH1	0	1	8	0	3	0
GH2	0	0	5	3	3	0
GH7	1	2	2	3	1	0
GH9	2	3	8	3	4	3
GH32C	0	0	1	0	0	0
GH56	0	0	0	1	0	1
GH32N	0	0	2	0	0	0
GH2_N	0	0	0	3	0	0
GH2_C	0	0	0	2	0	0
GH10	0	0	7	0	0	0
GH39	0	0	1	0	0	0
GH38	0	2	9	4	8	6
GH15	0	5	10	2	2	16
GH17	0	1	0	0	0	0
GH16	1	1	1	0	0	1
GH19	0	3	12	0	0	0
GH18	1	8	26	18	22	28
GH31	1	2	23	6	8	8
GH30	1	1	1	7	1	6
GH35	0	2	6	4	3	4
GH63	0	1	1	1	1	2
