# Supplementary material for: The genome of the crustacean Parhyale hawaiensis, a model for animal development, regeneration, immunity and lignocellulose digestion
Source: eLife. 2016 Nov 16;5:e20062. doi: 10.7554/eLife.20062 (PMC5111886; doi:10.7554/eLife.20062)
Supplement: Figure 13—source data 1. — Parhyale IDs and numbers of immune related genes in comparison to other species. DOI: http://dx.doi.org/10.7554/eLife.20062.035 [file elife-20062-fig13-data1.xlsx]

## Sheet: Sheet1
		amphipod	copepod	amphipod	copepod	decapod	remipedia	branchiopoda	hexapod
ImmunoDB category	Description	P. hawaiensis	C. finmarchicus	E. veneris	E. serrulatus	L. vannamei	S. tulumensis	D. pulex	D. melanogaster	A.gambiae	S. maritima	M. martensii	S. mimosarum	I. scapularis	H.dujardini	S. mediterranea	C. elegans	B. floridae	H. sapiens
CLIP	Clip-domain Serine Proteases	54	239	9	24	78	34	96	41	53	12	38	25	35	47	4	1	17	20
CASPA	Caspase activators	0	1	0	1	0	0	1	5	2	1	0	2	1	1	0	0	0	0
TOLLPATH	Toll pathway members	6 (plus 10 toll-like receptors)	5	0	7	6	0	6	6	5	5	8	7	4	0	4	3	6	24
CAT	Catalases	1	2	3	4	3	1	1	2	1	1	1	1	1	6	3	4	2	1
REL	Relish-like proteins	2	13	0	3	2	0	4	2	2	1	5	5	2	0	0	0	0	11
BGBP or LGBP	1,3-beta-D glucan binding proteins	1	5	4	5	2	0	10	3	7	3	0	0	0	4	0	0	6	0
CTL	C-type lectins	48	250	9	55	88	20	26	31	24	25	24	24	17	22	32	27	428	92
SPZ	Spaetzle-like proteins	13	48	0	4	9	0	41	6	6	5	14	10	8	5	0	0	0	0
SOD	Superoxide Dismutase	10	18	5	14	10	5	10	3	4	6	6	4	9	10	6	5	6	13
LYS	Lysozymes	8	4	2	0	2	4	1	13	8	5	9	3	4	0	0	0	2	14
PPO	Prophenoloxidases	7	12	2	0	12	14	1	3	8	1	9	7	0	0	0	0	0	0
PGRP	Peptidoglycan recognition protens	0	0	0	0	0	1	0	12	5	18	0	7	3	3	5	0	14	4
APHAG	Autophagy genes	19	35	7	30	39	20	19	15	16	21	31	29	15	30	23	21	25	116
CASP	Caspases	22	95	6	17	67	3	15	6	13	7	0	5	6	8	13	7	32	31
TOLL	Toll-like receptors	10	26	1	15	10	0	7	9	10	37	17	15	10	3	2	4	98	29
TEP	Theioester-containing proteins	5	12	4	4	52	2	11	5	11	7	31	26	12	11	1	5	6	19
PRDX	Peroxidases	40	119	8	43	49	30	75	20	22	25	46	45	36	51	20	22	68	79
SCR	Scavenger receptors	17	141	2	40	49	3	20	18	18	21	24	22	22	20	8	5	137	91
IMDPATH	IMD Pathway members	7	3	1	5	14	1	7	8	6	7	3	5	3	15	7	7	6	26
JAKSTAT	Jak-stat signal transduction	25	10	0	6	11	1	4	2	4	5	4	9	3	4	2	4	6	25
GALE	Galactoside-binding lectins	2	5	1	1	4	6	7	6	8	2	6	5	5	3	2	30	9	34
FREP	Fibrinogen-related proteins	17	19	1	3	38	8	5	11	39	10	19	17	25	1	4	4	178	35
IAP	Inhibitors of apoptosis	10	12	5	12	34	0	9	4	8	13	3	4	6	16	51	3	17	29
ML	MD2-Like receptors	7	5	5	4	10	42	6	8	14	4	2	10	12	5	3	1	3	9
SRRP	Small RNA regulatory pathway members	26	59	8	47	48	8	60	12	18	22	58	42	26	35	34	47	27	69
SRPN	Serine protease inhibitors	5	30	1	15	32	3	4	28	15	11	28	14	37	23	11	10	6	84
APHAG (autophagy genes)			CLT (c-type lectins)					LYS (lysozyme)				SPZ (Spaetzle-like proteins)
P. hawaiensis ID	ImmunoDB ID		P. hawaiensis ID	ImmunoDB ID				P. hawaiensis ID	ImmunoDB ID			P. hawaiensis ID	ImmunoDB ID
phaw_30_tra_m.010506	APHAG1_Aaeg_ESTdv333633		phaw_30_tra_m.015982	CTL1_Agam_CTLMA(Agam_N14685)				phaw_30_tra_m.002557	LYS1_Agam_Agam_N23062			phaw_30_tra_m.004792	SPZ1_Aaeg_Aaeg_N22040
phaw_30_tra_m.014946	APHAG1_Flyb_CG8866		phaw_30_tra_m.017092	CTL10_Aaeg_Aaeg_N43240				phaw_30_tra_m.020281	LYS1_Agam_Agam_N23062			phaw_30_tra_m.004654	SPZ1_Cpip_CPIJ006792
phaw_30_tra_m.000713	APHAG11_Aaeg_AAEL009105		phaw_30_tra_m.007930	CTL10_Aaeg_Aaeg_N43240				phaw_30_tra_m.003443	LYS1_Flyb_Flyb_N12318			phaw_30_tra_m.003356	SPZ2_Aaeg_Aaeg_N23942
phaw_30_tra_m.005178	APHAG12_Aaeg_AAEL013815		phaw_30_tra_m.024453	CTL10_Aaeg_Aaeg_N43240				phaw_30_tra_m.000739	LYS2_Agam_ENSANGG00000027898			phaw_30_tra_m.000524	SPZ2_Aaeg_Aaeg_N23942
phaw_30_tra_m.010794	APHAG13_Aaeg_AAEL009089		phaw_30_tra_m.007371	CTL10_Flyb_CG14500-PA				phaw_30_tra_m.002953	LYS2_Agam_ENSANGG00000027898			phaw_30_tra_m.008441	SPZ2_Flyb_Flyb_N7496
phaw_30_tra_m.023984	APHAG17_Aaeg_AAEL000693		phaw_30_tra_m.017738	CTL10_Flyb_CG14500-PA				phaw_30_tra_m.002952	LYS5_Aaeg_AAEL003712			phaw_30_tra_m.006144	SPZ2_Flyb_Flyb_N7496
phaw_30_tra_m.022282	APHAG19_Aaeg_AaXP_001659565		phaw_30_tra_m.019727	CTL11_Agam_CTL9				phaw_30_tra_m.011758	LYS5_Aaeg_AAEL003712			phaw_30_tra_m.010408	SPZ2_Flyb_Flyb_N7496
phaw_30_tra_m.010676	APHAG2_Agam_AGAP004092		phaw_30_tra_m.025565	CTL12_Cpip_CPIJ001323				phaw_30_tra_u.005818	LYS6_Flyb_Flyb_N12792			phaw_30_tra_m.025501	SPZ2_Flyb_Flyb_N7496
phaw_30_tra_m.006871	APHAG20_Flyb_CG7986		phaw_30_tra_m.017811	CTL12_Flyb_CG12111-PA								phaw_30_tra_m.001609	SPZ2_Flyb_Flyb_N7496
phaw_30_tra_m.007066	APHAG23_Flyb_Buffy		phaw_30_tra_m.011779	CTL12_Flyb_CG12111-PA								phaw_30_tra_m.004647	SPZ3_Flyb_Flyb_N12851
phaw_30_tra_m.023073	APHAG3_Cpip_CPIJ001235		phaw_30_tra_m.012830	CTL12_Flyb_CG12111-PA				ML (MD2-like receptors)				phaw_30_tra_m.010495	SPZ4_Agam_Agam_N22133
phaw_30_tra_m.017868	APHAG4_Aaeg_AAEL010516		phaw_30_tra_m.000980	CTL12_Flyb_CG12111-PA				P. hawaiensis ID	ImmunoDB ID			phaw_30_tra_m.021200	SPZ4_Flyb_Flyb_N13428
phaw_30_tra_m.020475	APHAG6_Agam_AGAP010939		phaw_30_tra_m.026025	CTL12_Flyb_CG12111-PA				phaw_30_tra_m.021219	ML1_Flyb_CG7291-PA			phaw_30_tra_m.010279	SPZ5_Agam_Agam_N15891
phaw_30_tra_m.003566	APHAG6_Cpip_CPIJ011087		phaw_30_tra_m.018946	CTL12_Flyb_CG12111-PA				phaw_30_tra_m.023437	ML1_Flyb_CG7291-PA
phaw_30_tra_m.014041	APHAG8_Aaeg_AAEL010641		phaw_30_tra_m.007886	CTL12_Flyb_CG12111-PA				phaw_30_tra_m.000504	ML1_Flyb_CG7291-PA
phaw_30_aug_m.028328	APHAG8_Cpip_CPIJ002897		phaw_30_tra_m.024732	CTL13_Flyb_CG13686-PA				phaw_30_tra_m.024446	ML10_Agam_ENSANGP00000019434			SRPN (Serine protease inhibitors)
phaw_30_tra_m.004111	APHAG8_Cpip_CPIJ002897		phaw_30_tra_m.014192	CTL14_Flyb_CG6055-PA				phaw_30_tra_m.004024	ML2_Agam_ENSANGP00000016963			P. hawaiensis ID	ImmunoDB ID
phaw_30_tra_m.023949	APHAG9_Aaeg_AAEL012306		phaw_30_tra_m.003743	CTL14_Flyb_CG6055-PA				phaw_30_tra_m.024201	ML3_Aaeg_AAEL004120-RA			phaw_30_tra_m.016796	SRPN14_Agam_Agam_N7866
phaw_30_tra_m.012255	APHAG9_Flyb_CG5489		phaw_30_tra_m.008501	CTL18_Cpip_CPIJ004339				phaw_30_tra_m.002227	ML8_Aaeg_AAEL009557-RA			phaw_30_tra_m.022351	SRPN18_Flyb_Flyb_N3304
			phaw_30_tra_m.013047	CTL21_Flyb_CG15358-PA								phaw_30_tra_m.026559	SRPN32_Cpip_CqSRPN9
BGBP or LGBP 1,3-beta-D glucan binding proteins			phaw_30_tra_m.011544	CTL22_Aaeg_AAEL011455-RA								phaw_30_tra_m.024707	SRPN34_Cpip_CqSRPN6
P. hawaiensis ID	ImmunoDB ID		phaw_30_tra_m.003599	CTL24_Flyb_CG1656-PA				PPO (prophenoloxidases)				phaw_30_tra_m.024876	SRPN60_Cpip_CqSRPN10Bb
phaw_30_tra_m.007430	BGBP5_Aaeg_Aaeg_N44756		phaw_30_tra_m.003600	CTL24_Flyb_CG1656-PA				P. hawaiensis ID	ImmunoDB ID
			phaw_30_tra_m.011694	CTL25_Agam_Agam_N11744				phaw_30_tra_m.016060	PPO1_Agam_Agam_N24427
			phaw_30_tra_m.010887	CTL27_Aaeg_AAEL011402-RA				phaw_30_tra_m.025876	PPO1_Flyb_Flyb_N6051			SRRP (Small RNA regulatory pathway members)
CASP caspases			phaw_30_tra_m.022321	CTL28_Flyb_CG6014-PA				phaw_30_aug_m.028635	PPO2_Flyb_Flyb_N10216			P. hawaiensis ID	ImmunoDB ID
P. hawaiensis ID	ImmunoDB ID		phaw_30_tra_m.012981	CTL28_Flyb_CG6014-PA				phaw_30_tra_m.009689	PPO2_Flyb_Flyb_N10216			phaw_30_aug_m.027933	SRRP1_Aaeg_AAEL001612
phaw_30_tra_m.019156	CASP11_Aaeg_new		phaw_30_tra_m.018835	CTL30_Flyb_CG9134-PB				phaw_30_tra_m.023727	PPO3_Flyb_Flyb_N12081			phaw_30_tra_m.007425	SRRP10_Cpip_CPIJ008595
phaw_30_tra_m.022406	CASP2_Agam_Agam_N19020		phaw_30_aug_m.027228	CTL30_Flyb_CG9134-PB				phaw_30_tra_m.011345	PPO5_Cpip_CPIJ016564			phaw_30_tra_m.006391	SRRP10_Cpip_CPIJ008595
phaw_30_tra_m.003439	CASP2_Agam_Agam_N19020		phaw_30_tra_m.020398	CTL30_Flyb_CG9134-PB				phaw_30_tra_m.008766	PPO6_Cpip_CPIJ007275			phaw_30_tra_m.000091	SRRP11_Aaeg_AAEL000293
phaw_30_tra_m.016809	CASP2_Agam_Agam_N19020		phaw_30_tra_m.020829	CTL30_Flyb_CG9134-PB								phaw_30_tra_m.018110	SRRP11_Cpip_CPIJ010675
phaw_30_tra_m.017334	CASP2_Cpip_CPIJ002923		phaw_30_tra_m.021406	CTL31_Aaeg_AAEL006456-RA								phaw_30_tra_m.014329	SRRP12_Agam_AGAP005652
phaw_30_tra_m.026152	CASP3_Agam_Agam_N21196		phaw_30_tra_m.013427	CTL31_Aaeg_AAEL006456-RA				PRDX (peroxidases)				phaw_30_tra_m.012297	SRRP13_Aaeg_AAEL009326
phaw_30_tra_m.006664	CASP3_Cpip_CPIJ000671		phaw_30_tra_m.007597	CTL31_Aaeg_AAEL006456-RA				P. hawaiensis ID	ImmunoDB ID			phaw_30_tra_m.021900	SRRP17_Aaeg_AAEL001317
phaw_30_tra_m.008934	CASP3_Flyb_Flyb_N9898		phaw_30_tra_m.023941	CTL35_Aaeg_AAEL002524-RA				phaw_30_tra_m.004200	PRDX10_Agam_Agam_N12633			phaw_30_tra_m.012605	SRRP18_Aaeg_AAEL001769
phaw_30_tra_m.000665	CASP4_Agam_Agam_N23016		phaw_30_tra_m.000890	CTL38_Aaeg_AAEL003119-RA				phaw_30_tra_m.022124	PRDX11_Cpip_CPIJ016742			phaw_30_tra_m.004444	SRRP18_Aaeg_AAEL001769
phaw_30_tra_m.013910	CASP4_Flyb_Flyb_N11768		phaw_30_tra_m.012243	CTL40_Cpip_CPIJ007868				phaw_30_aug_m.027829	PRDX11_Cpip_CPIJ016742			phaw_30_tra_m.001849	SRRP18_Cpip_CPIJ017541
phaw_30_tra_m.007500	CASP5_Flyb_Flyb_N12006		phaw_30_tra_m.008329	CTL43_Cpip_CPIJ007999				phaw_30_aug_m.027131	PRDX11_Cpip_CPIJ016742			phaw_30_tra_m.006860	SRRP19_Aaeg_AAEL002083
phaw_30_tra_m.022492	CASP6_Aaeg_Aaeg_N34795		phaw_30_tra_m.009342	CTL5_Agam_CTL8				phaw_30_tra_m.005298	PRDX11_Flyb_Flyb_N164			phaw_30_tra_m.006468	SRRP19_Aaeg_AAEL002083
phaw_30_tra_m.001495	CASP6_Aaeg_Aaeg_N34795		phaw_30_tra_m.010230	CTL5_Cpip_CPIJ000440				phaw_30_tra_m.000786	PRDX12_Agam_Agam_N20809			phaw_30_tra_m.021619	SRRP2_Aaeg_AAEL006794
phaw_30_tra_m.000784	CASP6_Aaeg_Aaeg_N34795		phaw_30_tra_m.026116	CTL7_Aaeg_Aaeg_N33235				phaw_30_tra_m.021206	PRDX12_Agam_Agam_N20809			phaw_30_tra_m.015270	SRRP2_Agam_AGAP012289
phaw_30_tra_m.020828	CASP6_Aaeg_Aaeg_N34795		phaw_30_tra_m.004125	CTL7_Aaeg_Aaeg_N33235				phaw_30_tra_m.024634	PRDX12_Agam_Agam_N20809			phaw_30_tra_m.023485	SRRP20_Cpip_CPIJ005545
phaw_30_tra_m.020709	CASP6_Agam_Agam_N20956		phaw_30_tra_m.018200	CTL77_Cpip_CPIJ017075				phaw_30_tra_m.012604	PRDX12_Cpip_CPIJ018105			phaw_30_tra_m.014234	SRRP26_Cpip_CPIJ014935
phaw_30_tra_m.015829	CASP6_Agam_Agam_N20956		phaw_30_tra_m.024530	CTL8_Aaeg_Aaeg_N25668				phaw_30_tra_m.011808	PRDX12_Cpip_CPIJ018105			phaw_30_tra_m.018276	SRRP3_Aaeg_AAEL015246
phaw_30_tra_m.021960	CASP7_Aaeg_Aaeg_N48875		phaw_30_tra_m.022024	CTL8_Aaeg_Aaeg_N25668				phaw_30_tra_m.015488	PRDX12_Cpip_CPIJ018105			phaw_30_tra_m.012367	SRRP3_Aaeg_AAEL015246
phaw_30_tra_m.001353	CASP7_Agam_Agam_N13779		phaw_30_tra_m.025146	CTL85_Cpip_CPIJ018418				phaw_30_tra_m.021205	PRDX13_Aaeg_Aaeg_N33247			phaw_30_tra_m.006642	SRRP4_Aaeg_AAEL012410
phaw_30_tra_m.015330	CASP8_Agam_Agam_N13805		phaw_30_tra_m.007194	CTL9_Agam_CTLSE1				phaw_30_tra_m.021772	PRDX13_Aaeg_Aaeg_N33247			phaw_30_tra_m.001257	SRRP4_Cpip_CPIJ003169
phaw_30_tra_m.015615	CASP8_Cpip_CPIJ008252		phaw_30_tra_m.021891	CTL9_Flyb_CG9095-PA				phaw_30_tra_m.025114	PRDX13_Aaeg_Aaeg_N33247			phaw_30_tra_m.000281	SRRP6_Aaeg_AAEL007823
phaw_30_tra_m.006683	CASP8_Cpip_CPIJ008252							phaw_30_tra_m.001127	PRDX13_Aaeg_Aaeg_N33247			phaw_30_tra_m.001661	SRRP6_Aaeg_AAEL007823
								phaw_30_tra_m.017639	PRDX15_Flyb_Flyb_N1440			phaw_30_tra_m.016012	SRRP6_Aaeg_AAEL007823
			FREP (fibrinogen related proteins)					phaw_30_tra_m.012244	PRDX16_Agam_Agam_N24576			phaw_30_tra_m.000074	SRRP7_Flyb_CG1800
CAT (catalase)			P. hawaiensis ID	ImmunoDB ID				phaw_30_tra_m.023037	PRDX16_Agam_Agam_N24576			phaw_30_tra_m.015433	SRRP8_Aaeg_AAEL008592
P. hawaiensis ID	ImmunoDB ID		phaw_30_tra_m.020788	FREP11_Agam_Agam_N22125				phaw_30_tra_m.007278	PRDX16_Flyb_Flyb_N10292
phaw_30_tra_m.014220	CAT2_Aaeg_Aaeg_N41501		phaw_30_tra_m.014626	FREP11_Agam_Agam_N22125				phaw_30_tra_m.020289	PRDX17_Flyb_Flyb_N11675
			phaw_30_tra_m.026562	FREP11_Cpip_CPIJ001260				phaw_30_tra_m.011300	PRDX17_Flyb_Flyb_N11675			TEP (thioester containing proteins)
CLIP (Clip-domain Serine Proteases)			phaw_30_tra_m.023902	FREP14_Flyb_Flyb_N12440				phaw_30_tra_m.015392	PRDX18_Aaeg_Aaeg_N38124			P. hawaiensis ID	ImmunoDB ID
P. hawaiensis ID	ImmunoDB ID		phaw_30_tra_m.024959	FREP15_Aaeg_Aaeg_N42927				phaw_30_tra_m.011266	PRDX18_Cpip_CPIJ003399			phaw_30_tra_m.007143	TEP1_Aaeg_Aaeg_N37326
phaw_30_tra_m.017758	CLIP10_Agam_gPB1		phaw_30_tra_m.001698	FREP15_Cpip_CPIJ005841				phaw_30_tra_m.021328	PRDX19_Cpip_CPIJ011413			phaw_30_tra_m.019407	TEP1_Aaeg_Aaeg_N37326
phaw_30_aug_m.028379	CLIP10_Cpip_CPIJ017792		phaw_30_tra_m.005980	FREP16_Agam_Agam_N999				phaw_30_tra_m.023582	PRDX2_Flyb_Flyb_N6484			phaw_30_tra_m.014739	TEP3_Agam_Agam_N3785
phaw_30_tra_m.018025	CLIP10_Flyb_Flyb_N9556		phaw_30_tra_m.013200	FREP2_Aaeg_Aaeg_N27908				phaw_30_aug_m.028110	PRDX21_Aaeg_Aaeg_N20739			phaw_30_tra_m.013844	TEP3_Flyb_Flyb_N11618
phaw_30_tra_m.018236	CLIP11_Agam_gPD1		phaw_30_tra_m.010945	FREP24_Agam_Agam_N13972				phaw_30_tra_u.017111	PRDX21_Cpip_CPIJ008450			phaw_30_tra_m.018255	TEP9_Flyb_Flyb_N11200
phaw_30_tra_m.024206	CLIP11_Cpip_CPIJ017793		phaw_30_tra_m.021500	FREP25_Aaeg_Aaeg_N27509				phaw_30_aug_m.027470	PRDX24_Agam_Agam_N15209
phaw_30_tra_m.007082	CLIP11_Cpip_CPIJ017793		phaw_30_tra_m.015777	FREP26_Agam_Agam_N3028				phaw_30_aug_m.027471	PRDX24_Agam_Agam_N15209
phaw_30_tra_m.018878	CLIP14_Cpip_CPIJ016160		phaw_30_tra_m.015541	FREP28_Agam_Agam_N3050				phaw_30_tra_m.023440	PRDX24_Agam_Agam_N15209			TOLL (toll like receptors)
phaw_30_tra_m.004196	CLIP15_Aaeg_aH15		phaw_30_tra_m.023774	FREP42_Agam_Agam_N17051				phaw_30_aug_m.028100	PRDX24_Agam_Agam_N15209			P. hawaiensis ID	ImmunoDB ID
phaw_30_tra_m.006342	CLIP15_Aaeg_aH15		phaw_30_tra_m.003298	FREP44_Agam_Agam_N22583				phaw_30_tra_m.014283	PRDX3_Aaeg_Aaeg_N41981			phaw_30_tra_m.004118	TOLL1_Flyb_Flyb_N9998
phaw_30_tra_m.005289	CLIP15_Agam_gPD6		phaw_30_tra_m.008310	FREP62_Cpip_CPIJ013294				phaw_30_tra_m.010710	PRDX4_Aaeg_Aaeg_N19596			phaw_30_tra_m.012432	TOLL11_Aaeg_TOLL9A
phaw_30_tra_m.011564	CLIP15_Cpip_CPIJ016222		phaw_30_tra_m.003657	FREP65_Agam_ENSANGG00000017827				phaw_30_tra_m.021427	PRDX6_Cpip_CPIJ003117			phaw_30_tra_m.000707	TOLL12_Aaeg_TOLL6
phaw_30_tra_m.015249	CLIP16_Cpip_CPIJ001060		phaw_30_tra_m.001735	FREP66_Cpip_CPIJ014772				phaw_30_tra_m.000145	PRDX7_Aaeg_Aaeg_N36683			phaw_30_tra_m.020616	TOLL2_Aaeg_Aaeg_N35478
phaw_30_tra_m.011384	CLIP16_Cpip_CPIJ001060							phaw_30_tra_m.015289	PRDX8_Agam_Agam_N15234			phaw_30_tra_m.002190	TOLL6_Cpip_CPIJ018343
phaw_30_tra_m.020710	CLIP16_Flyb_Flyb_N12987							phaw_30_tra_m.022750	PRDX8_Agam_Agam_N15234			phaw_30_tra_m.022043	TOLL6_Cpip_CPIJ018343
phaw_30_tra_m.011122	CLIP18_Flyb_Flyb_N7060		GALE (galactoside binding lectins)					phaw_30_tra_m.022209	PRDX8_Agam_Agam_N15234			phaw_30_tra_m.020724	TOLL6_Cpip_CPIJ018343
phaw_30_tra_m.022183	CLIP19_Aaeg_aP19		P. hawaiensis ID	ImmunoDB ID				phaw_30_aug_m.028198	PRDX8_Flyb_Flyb_N4448			phaw_30_tra_m.005934	TOLL7_Aaeg_Aaeg_N21044
phaw_30_tra_m.013177	CLIP19_Cpip_CPIJ016225		phaw_30_tra_m.023833	GALE1_Agam_Agam_N10633				phaw_30_tra_m.024226	PRDX9_Flyb_Flyb_N3839			phaw_30_tra_m.013428	TOLL8_Agam_Agam_N12632
phaw_30_tra_m.011276	CLIP23_Aaeg_aP23		phaw_30_tra_m.004674	GALE4_Aaeg_Aaeg_N44574								phaw_30_tra_m.006870	TOLL9_Agam_Agam_N12613
phaw_30_tra_m.000844	CLIP23_Aaeg_aP23
phaw_30_tra_m.019350	CLIP24_Flyb_Flyb_N9617							REL (relish like proteins)
phaw_30_tra_m.019461	CLIP24_Flyb_Flyb_N9617		IAP (inhibitors of apoptosis)					P. hawaiensis ID	ImmunoDB ID			TOLLPATH (toll pathway members)
phaw_30_tra_m.006817	CLIP25_Flyb_Flyb_N3745		P. hawaiensis ID	ImmunoDB ID				phaw_30_tra_m.007213	REL1_Agam_Agam_N16239			P. hawaiensis ID	ImmunoDB ID
phaw_30_tra_m.012050	CLIP26_Agam_gPD2		phaw_30_tra_m.017869	IAP1_Flyb_Flyb_N12163				phaw_30_tra_m.014117	REL1_Cpip_CPIJ012236			phaw_30_tra_m.005253	TOLLPATH2_Agam_Agam_N26052
phaw_30_tra_m.017630	CLIP26_Agam_gPD2		phaw_30_tra_m.020513	IAP2_Cpip_CPIJ019231								phaw_30_tra_m.021923	TOLLPATH2_Agam_Agam_N26052
phaw_30_tra_m.000141	CLIP26_Agam_gPD2		phaw_30_tra_m.000131	IAP2_Flyb_Flyb_N1660								phaw_30_tra_m.002551	TOLLPATH2_Agam_Agam_N26052
phaw_30_tra_m.020067	CLIP26_Agam_gPD2		phaw_30_tra_m.025240	IAP2_Flyb_Flyb_N1660				SCR (scavenger receptors)				phaw_30_tra_m.019659	TOLLPATH3_Aaeg_Aaeg_N21589
phaw_30_tra_m.016239	CLIP30_Agam_gH30		phaw_30_tra_m.003733	IAP3_Aaeg_Aaeg_N37896				P. hawaiensis ID	ImmunoDB ID			phaw_30_tra_m.021560	TOLLPATH4_Agam_Agam_N16981
phaw_30_tra_m.011079	CLIP30_Flyb_Flyb_N791		phaw_30_tra_m.011364	IAP3_Flyb_Flyb_N10612				phaw_30_tra_m.003150	SCR1_Agam_Agam_N13910			phaw_30_tra_m.007026	TOLLPATH4_Flyb_Flyb_N10272
phaw_30_tra_m.021647	CLIP32_Agam_gH32		phaw_30_aug_m.028131	IAP3_Flyb_Flyb_N10612				phaw_30_tra_m.006776	SCR14_Cpip_CpSCRB9
phaw_30_tra_m.016165	CLIP33_Aaeg_aP33		phaw_30_tra_m.000342	IAP3_Flyb_Flyb_N10612				phaw_30_tra_m.007729	SCR15_Agam_Agam_N24877
phaw_30_tra_m.010105	CLIP37_Agam_gHA10		phaw_30_tra_m.004673	IAP5_Agam_Agam_N14059				phaw_30_tra_m.019345	SCR16_Agam_Agam_N15197
phaw_30_tra_m.020931	CLIP37_Cpip_CPIJ013430		phaw_30_tra_m.014493	IAP5_Cpip_CPIJ006694				phaw_30_tra_m.022970	SCR16_Cpip_CPIJ003102
phaw_30_tra_m.001838	CLIP38_Flyb_CSP32							phaw_30_tra_m.019518	SCR17_Aaeg_Aaeg_N26652
phaw_30_tra_m.004741	CLIP39_Agam_gPB16							phaw_30_tra_m.017531	SCR17_Aaeg_Aaeg_N26652
phaw_30_tra_m.003132	CLIP4_Cpip_CPIJ006013		IMDPATH (IMD pathway members)					phaw_30_tra_m.024521	SCR17_Aaeg_Aaeg_N26652
phaw_30_tra_m.018069	CLIP40_Agam_gPB6		P. hawaiensis ID	ImmunoDB ID				phaw_30_tra_m.020877	SCR2_Aaeg_Aaeg_N52797
phaw_30_tra_m.000703	CLIP40_Agam_gPB6		phaw_30_tra_m.020018	IMDPATH1_Flyb_Flyb_N10064				phaw_30_tra_m.023533	SCR2_Aaeg_Aaeg_N52797
phaw_30_tra_m.001441	CLIP40_Agam_gPB6		phaw_30_tra_m.024399	IMDPATH2_Aaeg_Aaeg_N18998				phaw_30_tra_m.021515	SCR21_Aaeg_AAEL014367(cut)
phaw_30_tra_m.000404	CLIP40_Flyb_Flyb_N12100		phaw_30_tra_m.014696	IMDPATH2_Cpip_CPIJ006370				phaw_30_tra_m.021516	SCR21_Aaeg_AAEL014367(cut)
phaw_30_tra_m.020740	CLIP46_Agam_gPD7		phaw_30_tra_m.015370	IMDPATH3_Aaeg_Aaeg_N38178				phaw_30_tra_m.002266	SCR22_Cpip_CPIJ005244
phaw_30_tra_m.017769	CLIP47_Cpip_CPIJ010298		phaw_30_tra_m.001667	IMDPATH4_Cpip_CPIJ015672				phaw_30_tra_m.004788	SCR3_Cpip_CPIJ007535
phaw_30_tra_m.020175	CLIP50_Aaeg_aP50		phaw_30_tra_m.026119	IMDPATH8_Aaeg_CASPAR1				phaw_30_tra_m.023907	SCR6_Aaeg_SCRB17
phaw_30_tra_m.021881	CLIP58_Aaeg_aP58		phaw_30_tra_m.007388	IMDPATH8_Flyb_TAB2				phaw_30_tra_m.023268	SCR9_Aaeg_Aaeg_N27779
phaw_30_tra_m.004967	CLIP58_Aaeg_aP58							phaw_30_tra_m.008358	SCR9_Aaeg_Aaeg_N27779
phaw_30_tra_m.011590	CLIP6_Agam_gPB2
phaw_30_tra_m.006490	CLIP65_Cpip_CPIJ009480		JAKSTAT (jak-stat signal transduction)
phaw_30_tra_m.019714	CLIP66_Cpip_CPIJ009894		P. hawaiensis ID	ImmunoDB ID				SOD (superoxide dismutase)
phaw_30_tra_m.000570	CLIP68_Cpip_CPIJ006430		phaw_30_tra_m.004356	JAKSTAT1_Aaeg_Aaeg_N38108				P. hawaiensis ID	ImmunoDB ID
phaw_30_tra_m.025122	CLIP7_Agam_gPC2		phaw_30_tra_m.022909	JAKSTAT2_Flyb_Flyb_N4423				phaw_30_tra_m.014364	SOD1_Flyb_Flyb_N12624
phaw_30_tra_m.023198	CLIP7_Agam_gPC2		phaw_30_tra_m.017679	JAKSTAT3_Aaeg_Aaeg_N28569				phaw_30_tra_u.013400	SOD1_Flyb_Flyb_N12624
phaw_30_tra_m.025699	CLIP7_Flyb_Flyb_N8524		phaw_30_tra_m.000974	JAKSTAT3_Aaeg_Aaeg_N28569				phaw_30_tra_m.020474	SOD3_Aaeg_Aaeg_N31871(supercontig_1.5_1342653-1363914)=Aaeg_N34696(supercontig_1.584_422035-422496)=AAEL011498-RA=AAEL000274-RA
phaw_30_tra_m.015051	CLIP70_Cpip_CPIJ004304							phaw_30_tra_m.023585	SOD3_Aaeg_Aaeg_N31871(supercontig_1.5_1342653-1363914)=Aaeg_N34696(supercontig_1.584_422035-422496)=AAEL011498-RA=AAEL000274-RA
phaw_30_tra_m.014784	CLIP70_Cpip_CPIJ004304		JAKSTAT (jak-stat signal transduction)					phaw_30_tra_m.000508	SOD3_Aaeg_Aaeg_N31871(supercontig_1.5_1342653-1363914)=Aaeg_N34696(supercontig_1.584_422035-422496)=AAEL011498-RA=AAEL000274-RA
phaw_30_tra_m.003267	CLIP9_Flyb_Flyb_N2134		P. hawaiensis ID	KEGG ID	Gene names			phaw_30_tra_m.012670	SOD3_Aaeg_Aaeg_N31871(supercontig_1.5_1342653-1363914)=Aaeg_N34696(supercontig_1.584_422035-422496)=AAEL011498-RA=AAEL000274-RA
			phaw_30_tra_m.018731	K04456	AKT			phaw_30_tra_m.010789	SOD3_Cpip_CPIJ016031
			phaw_30_tra_m.023362	K04707	CBL			phaw_30_tra_m.006493	SOD3_Cpip_CPIJ016031
			phaw_30_tra_m.017821	K10151	CCND2			phaw_30_tra_m.014032	SOD4_Aaeg_Aaeg_N52358
			phaw_30_tra_m.020193	K10151	CCND2			phaw_30_tra_m.006573	SOD6_Cpip_CPIJ004719
			phaw_30_tra_m.004356	K19599	DOME
			phaw_30_tra_m.018772	K04498	EP300, CREBBP, KAT3
			phaw_30_tra_m.014454	K04364	GRB2
			phaw_30_tra_m.014106	K04706	PIAS1
			phaw_30_tra_m.014434	K00922	PIK3C
			phaw_30_tra_m.012298	K02649	PIK3R
			phaw_30_tra_m.000818	K04702	PIM1
			phaw_30_tra_m.023912	K07293	PTPN11
			phaw_30_tra_m.021615	K18026	PTPN2, PTPT
			phaw_30_tra_m.019745	K04695	SOCS2, CIS2
			phaw_30_tra_m.019821	K04695	SOCS2, CIS2
			phaw_30_tra_m.011035	K04698	SOCS5
			phaw_30_tra_m.010394	K04699	SOCS6_7
			phaw_30_tra_m.024157	K03099	SOS
			phaw_30_tra_m.006433	K04703	SPRED
			phaw_30_tra_m.023657	K04705	STAM
			phaw_30_tra_m.017679	K11224	STAT5B
