# Supplementary material for: The genome of the crustacean Parhyale hawaiensis, a model for animal development, regeneration, immunity and lignocellulose digestion
Source: eLife. 2016 Nov 16;5:e20062. doi: 10.7554/eLife.20062 (PMC5111886; doi:10.7554/eLife.20062)
Supplement: Figure 14—source data 1. — RFAM annotation of the Parhyale genome. DOI: http://dx.doi.org/10.7554/eLife.20062.039 [file elife-20062-fig14-data1.xlsx]

## Sheet: phaw.3.0.rfam.mirna.seq
phaw_30.0031180	6777-6822	RF00032	Histone3	Gene	Cis-reg	AAAAGCGGCAATTTTTACAAATGTGGCCATTAAAATGGCCATTTT
phaw_30.0054252	23405-23449	RF00032	Histone3	Gene	Cis-reg	AAACGGCTCCTCTAGGAGCCACCAATTCTTCGGAAATGTACTCT
phaw_30.0030483	20267-20312	RF00032	Histone3	Gene	Cis-reg	AAACGGCTCCTCTAGGAGCCACCTATTCTTCGGAAATGTACTCGT
phaw_30.0027360	18339-18383	RF00032	Histone3	Gene	Cis-reg	AAACGGCTCCTCTAGGAGCCACCTATTCTTCGGAAATGTACTCT
phaw_30.0038284	69-113	RF00032	Histone3	Gene	Cis-reg	AAACGGCTCCTCTAGGAGCCACCTATTCTTCGGAAATGTACTCT
phaw_30.0080030	126-170	RF00032	Histone3	Gene	Cis-reg	AAACGGCTCCTCTAGGAGCCACCTATTCTTCGGAAATGTACTCT
phaw_30.0022788	20030-20074	RF00032	Histone3	Gene	Cis-reg	AAACGGCTCCTCTAGGAGCCACCTATTCTTCTGAAATGTACTCT
phaw_30.0014020	18080-18125	RF00032	Histone3	Gene	Cis-reg	AAACGGCTCCTCTTGGAGCCACCACTATTCTGGAAAATACTTTGT
phaw_30.0031265	14750-14795	RF00032	Histone3	Gene	Cis-reg	AAACGGCTCCTCTTGGAGCCACCACTATTCTGGAAAATACTTTGT
phaw_30.0037292	20374-20419	RF00032	Histone3	Gene	Cis-reg	AAAGTACATTTCCGAAGAATAGGTGGCTCCTAGAGGAGCCGTTTT
phaw_30.0003252	125614-125644	RF02253	IRE_II	Gene	Cis-reg	AAATATCCTGTACAGTGATACATATATTTA
phaw_30.0005385	16072	RF00032	Histone3	Gene	Cis-reg	AACGGCTCCTCTAGGAGCCACCTATTCTTCGGAAATGTACTCT
phaw_30.0006591	60231-60280	RF02253	IRE_II	Gene	Cis-reg	AACTATGGCGAGCGACCGCTAGTGACGTCATTGCTGTCGCCGATAATTT
phaw_30.0025616	32957-33002	RF00032	Histone3	Gene	Cis-reg	AAGAATCATCTTCAGAATAGTGGTGGCTCCAAGAGGAGCCGGTGG
phaw_30.0051280	1970-2015	RF00032	Histone3	Gene	Cis-reg	AAGACCTTCTCGTGAAATAAAGGTGGACCTAAAAAGGTCCGAGTC
phaw_30.0083793	433-478	RF00032	Histone3	Gene	Cis-reg	AAGCACTTCTCTTAAAACATATGTGGCTCCAAGAGGAGCCGGTGG
phaw_30.0030483	17205-17250	RF00032	Histone3	Gene	Cis-reg	AAGCATCATCTTCAGAATAGTGGTGGCTCCAAGAGGAGCCGGAGT
phaw_30.0027360	17000-17045	RF00032	Histone3	Gene	Cis-reg	AAGCATCATTTTCAGAATAGTGGTGGCTCCAAGAGGAGCCGGTGG
phaw_30.0009383	89716-89761	RF00032	Histone3	Gene	Cis-reg	AAGCATTCCTTTCAGAATAGTGGTGGCTCCAAGAGGAGCCGGGTT
phaw_30.0006629	31024-31069	RF00032	Histone3	Gene	Cis-reg	AAGGAGTAAATTTCATAAATAGGTGGCTCCTAGAGGAGCCGTTAG
phaw_30.0021262	17147-17192	RF00032	Histone3	Gene	Cis-reg	AAGGAGTCGCTGGTTACCAAAAATGGCTCTGAAAAGAGCCATTGT
phaw_30.0006629	5760-5805	RF00032	Histone3	Gene	Cis-reg	AAGTATCACTTCCAGAATAGTGGTGGCTCCAAGAGGAGCCGTTTA
phaw_30.0014020	38898-38943	RF00032	Histone3	Gene	Cis-reg	AAGTATCACTTTCGGAATAGTGGTGGCTCCAAGAGGAGCCGGTAG
phaw_30.0019893	63814-63859	RF00032	Histone3	Gene	Cis-reg	AATAGGATTTTCTTAAATCCATTCTAATGATACCTATAAAAGATG
phaw_30.0008109	8912-8942	RF02253	IRE_II	Gene	Cis-reg	AATTTTAGTAACCGCTGCTACTGAAAATTC
phaw_30.0047959	29-73	RF00032	Histone3	Gene	Cis-reg	ACCCGGCCCTACTTAGGGCCACCACCTCTTATGAAATGGTACTC
phaw_30.0029834	11907-11952	RF00032	Histone3	Gene	Cis-reg	ACCCGGCCCTACTTAGGGCCACTACCTCTTATGAAATGGTACTTG
phaw_30.0010362	23627-23671	RF00032	Histone3	Gene	Cis-reg	AGTACATTTCATAAGAAATAGGTGGCTCCTAGAGGAGCCGTATA
phaw_30.0014020	12810-12854	RF00032	Histone3	Gene	Cis-reg	AGTACATTTCATAAGGTAAAGGTGGCTCCGAGAGGAGCCGTATG
phaw_30.0031265	906-950	RF00032	Histone3	Gene	Cis-reg	ATACGGCTCCTCTCGGAGCCACCTTTACCTTATGAAATGTACTA
phaw_30.0014020	47040-47085	RF00032	Histone3	Gene	Cis-reg	ATCCGGCTCCTCTTGGAGCCACCACTATTCTGAAAGGAATGCTTT
phaw_30.0011417	46330-46375	RF00032	Histone3	Gene	Cis-reg	ATCTTTTAACGGCATCATTAGGATGGATTTAAGAAAATCCTATTA
phaw_30.0006307	36907-36951	RF00032	Histone3	Gene	Cis-reg	ATGAGGCTTCTTTTGAAGCCATCACTAAATACTAAATTAGGATA
phaw_30.0009383	101496-101541	RF00032	Histone3	Gene	Cis-reg	ATGTATCACTTTCAAAATAGTGGTGGCTCCAAGAGGAGCCGGTAG
phaw_30.0031265	20943-20988	RF00032	Histone3	Gene	Cis-reg	CAACGGCCCTTTTGAGGGCCACCTAATTAGTCAAGAGAAACTACT
phaw_30.0014020	22888-22933	RF00032	Histone3	Gene	Cis-reg	CAACGGCCCTTTTGAGGGCCACCTAATTCGTCAAGAAAAACTACC
phaw_30.0006629	14253-14298	RF00032	Histone3	Gene	Cis-reg	CAACGGCCCTTTTGAGGGCCACCTGATGCGTCAAGAGAAATTACT
phaw_30.0072000	534-579	RF00032	Histone3	Gene	Cis-reg	CACCGGCTCCTCTTGGAGCCACCACTAATCTGAAGATGATACTTT
phaw_30.0080472	71-116	RF00032	Histone3	Gene	Cis-reg	CACCGGCTCCTCTTGGAGCCACCACTATTCTGAAGATGATGCTTT
phaw_30.0088887	146-191	RF00032	Histone3	Gene	Cis-reg	CACCGGCTCCTCTTGGAGCCACCACTATTCTGAAGATGATGCTTT
phaw_30.0103554	70-115	RF00032	Histone3	Gene	Cis-reg	CACCGGCTCCTCTTGGAGCCACCACTATTCTGAAGATGATGCTTT
phaw_30.0012101	62286-62331	RF00032	Histone3	Gene	Cis-reg	GAGAACTTTTATTGACCGTGAGAGGGCGCTGAATAGCGCCTTATG
phaw_30.0005616	4189-4234	RF00032	Histone3	Gene	Cis-reg	GAGACCTCTATTCGTAATATGCATAGCTTTCAAAAAAGCTTTTGA
phaw_30.0022788	23551-23596	RF00032	Histone3	Gene	Cis-reg	GAGCATCATCTTCAGAATAGTGGTGGCTCCAAGAGGAGCCGGTGG
phaw_30.0064496	5554-5599	RF00032	Histone3	Gene	Cis-reg	GAGTAAATTTCACAAGGAACAGGTGGCTCCAAGAGGAGCCGTTTT
phaw_30.0006355	4345-4389	RF00032	Histone3	Gene	Cis-reg	GTCCTTTAGTTCACTATTTTTATGGTGTTGAAAAACACCTTAGT
phaw_30.0077363	490-573	RF02046	Sphinx_1	Gene	lncRNA	CTCTTCCCATAGAAGACTGAAGGATCATAAGGCCCATGAACTTTGGGGTTATAATCCGCAGGATATTCGCCCCAAACCATTTC
phaw_30.0000374	178420-178463	RF00163	Hammerhead_1	Gene	ribozyme	CCCACCTGATGAGCCGAGGTACGGCGAAACGCGCGTCGTGGGA
phaw_30.0000533	68993-69036	RF00163	Hammerhead_1	Gene	ribozyme	CCCACGACGCTCGTTTCGCCTTACTTCGGCTCATCAGGTGGGA
phaw_30.0001108	41537-41580	RF00163	Hammerhead_1	Gene	ribozyme	CCCACCTGATGAGCCGAGGTACGGCGAAACGCGCGTCGTGGGA
phaw_30.0001837	112975-113018	RF00163	Hammerhead_1	Gene	ribozyme	CCCACCTGATGAGCTCAAGAACAGCGAAACGCGCGTCGTGGGT
phaw_30.0002798	39252-39295	RF00163	Hammerhead_1	Gene	ribozyme	ATTACCTGATGAGCTGCAGAACAGCGAAACGCGCGTCGTGGGT
phaw_30.0003657	85553-85598	RF00163	Hammerhead_1	Gene	ribozyme	CCCACGACGCGCGTTTCGCGCTGTTCTTCAGCTCATCAGGTGGGA
phaw_30.0003797	139591-139634	RF00163	Hammerhead_1	Gene	ribozyme	TCCACCTGATGAGCTGGAGAACAGCGAAACGCGCGTCGTGGGT
phaw_30.0004095	91431-91474	RF00163	Hammerhead_1	Gene	ribozyme	CCCACCTGATGAGCCAAGGTACGGCGAAACGCGCGTCGTGGGA
phaw_30.0004632	122783-122826	RF00163	Hammerhead_1	Gene	ribozyme	GCCACCTGATGAGCTGGGGAACAGCGAAACGCGCGTCGTGGGT
phaw_30.0004746	10546-10589	RF00163	Hammerhead_1	Gene	ribozyme	CCCACCTGATGAGCCGAGGTAAGGCGAAACGCGCGTCGTGGGT
phaw_30.0004784	271672-271715	RF00163	Hammerhead_1	Gene	ribozyme	CCCACGACGCGCGTTTCGCCATACCTCGGCTCATCAGGTGGGA
phaw_30.0005398	69715-69758	RF00163	Hammerhead_1	Gene	ribozyme	CCCACGACGCGCGTTTCGCTGTTCTCCAGCTCATCAGGTGGGT
phaw_30.0005951	122316-122359	RF00163	Hammerhead_1	Gene	ribozyme	CCCACGACGCGCGTTTCGCTGTTCTCCAGCTCATCAGGTGGGT
phaw_30.0006371	142991-143034	RF00163	Hammerhead_1	Gene	ribozyme	CCCACCTGAAGAGCTGAAGAACAGCGAAACGCGCGTCGTGGGT
phaw_30.0009040	71372-71415	RF00163	Hammerhead_1	Gene	ribozyme	TCCACCTGATGAGCTGGAGAACAGCGAAACGCGCGTCGTGGGT
phaw_30.0009655	60068-60111	RF00163	Hammerhead_1	Gene	ribozyme	TCCACCTGAAGAGCTCATGAACAGCGAAACGCGCGTCGTGGAT
phaw_30.0009842	23409-23452	RF00163	Hammerhead_1	Gene	ribozyme	CCCACGACGCGCGTTTCGCTGTTCTCAAGCTCATCAGGTGGGA
phaw_30.0010526	145927-145970	RF00163	Hammerhead_1	Gene	ribozyme	CCCACCTGATGAGCTGGAGAACAGCGAAACGCGCGTCGTGGGT
phaw_30.0010884	102606-102649	RF00163	Hammerhead_1	Gene	ribozyme	CCCACGACGCGCGTTTCGCCGTATCTCGGCTCATCAGGTGGGA
phaw_30.0011957	102365-102408	RF00163	Hammerhead_1	Gene	ribozyme	CCCACCTGATGAGTTGAAGAACAGCGAAACGCGCGTCGTGGGT
phaw_30.0015037	86309-86352	RF00163	Hammerhead_1	Gene	ribozyme	CCCACGACGCGCGTTTCGCCGTATTTCGGCTCATCAGGTGGGA
phaw_30.0015537	15580-15623	RF00163	Hammerhead_1	Gene	ribozyme	TCCACCTGATGAGCTGGAGAACAGCGAAACGCGCGTCGTGGGT
phaw_30.0015600	15290-15333	RF00163	Hammerhead_1	Gene	ribozyme	TCCACGACGCGCGTTTCGCCGTACCTCGGCTCATCAGGTGGAA
phaw_30.0017186	44401-44444	RF00163	Hammerhead_1	Gene	ribozyme	CCCACGACGCGCGTTTCGCTGTTCTCCAGCTCATCAGGTGGGT
phaw_30.0017186	44905-44948	RF00163	Hammerhead_1	Gene	ribozyme	CCCACCTGATGAGCTGGAGAACAGCGAAACGCGCGTCGTGGGT
phaw_30.0021960	53786-53829	RF00163	Hammerhead_1	Gene	ribozyme	TCCACCTGATGAGCTGGAGAACAGCGAAACGCGCGTCGTGGGT
phaw_30.0022913	8925-8968	RF00163	Hammerhead_1	Gene	ribozyme	CCCACCTGATGAGCTGGAGAACAGCGAAACGCGCGTCGTGGGT
phaw_30.0028387	4874-4917	RF00163	Hammerhead_1	Gene	ribozyme	CCCACGACGCGCGTTTCGCTGTTCTCCAGCTCATCAGGTGGGT
phaw_30.0028966	13347-13390	RF00163	Hammerhead_1	Gene	ribozyme	CCCACGACGCGCGTTTCGCCGTACCTCAGCTCATCAGGTGGGT
phaw_30.0039985	16703-16746	RF00163	Hammerhead_1	Gene	ribozyme	CCCACCTGATGAGCCGAGATACGGCGAAACGCGCGTCGTGGGT
phaw_30.0043096	15858-15901	RF00163	Hammerhead_1	Gene	ribozyme	CCCACCTGATGAGCTGGAGAACAGCGAAACGCGCGTCGTGGGT
phaw_30.0060821	3483-3526	RF00163	Hammerhead_1	Gene	ribozyme	CCCACGACGCGCGTTTCGCCTTACCTCGGCTCATCAGGTGGGA
phaw_30.0104225	1170-1213	RF00163	Hammerhead_1	Gene	ribozyme	CCCACGACGCGCGTTTCGCTGTTCTCCAGCTCATCAGGTGGGT
phaw_30.0119245	869-912	RF00163	Hammerhead_1	Gene	ribozyme	CCCACGACGCGCGTTTCGCCGTATCTCGGCTCATCAGGTGGGA
phaw_30.0227008	66-109	RF00163	Hammerhead_1	Gene	ribozyme	CCCACGACGCGCGTTTCGCCGTACCTCGGCTCGTCAGGTGGTC
phaw_30.0294805	137-180	RF00163	Hammerhead_1	Gene	ribozyme	CCCACGACGCGCGTTTCGCTGTTCTCCAGCTCATCAGGTGGGT
phaw_30.0357524	20029	RF00163	Hammerhead_1	Gene	ribozyme	CCCACGACGCGCGTTTCGCTGTTCTCCAGCTCATCAGGTGGGT
phaw_30.0004151	262948-263008	RF00008	Hammerhead_3	Gene	ribozyme	ATGCGTTTCGCTGTAACCTCAGCTCATCAGGTGGGAGGATCGATCCTCCCACGACGCGTT
phaw_30.0004151	263054-263114	RF00008	Hammerhead_3	Gene	ribozyme	ATGCGTTTCGCTGTAACCTCAGCTCATCAGGTGGGAGGATCGATCCTCCCACGACGCGTT
phaw_30.0004720	475726-475940	RF00030	RNase_MRP	Gene	ribozyme	TCTGAAGGAGTGTAACCCCCATTGAGTTATTCACGAGGAATATTCGCATATCTTTGACTGTGACAGAGCGCTGTCAAGCACGCTGACTCGGATCGTTCCAAGTAAGTGTCAGCGGCCACTGACAACACTACAGTGTCAGCACTGAGCACTCGCTGCCGTAGTCTGGGGATTTTCCCTGGGACCTCAGCCCCAATAGCGAATCGTCCCACAGAAC
phaw_30.0088821	1144-1356	RF00030	RNase_MRP	Gene	ribozyme	AACTGTGGGACGATTCGCAATTGGGGCCGAGGTCCCAGGGAAAATCCCCAGACTACGGCAGCGAGTGCTCAGTGCTGACACTGTAGCGTTGTCAGTGGCCGCTGACACACTTGGAATGATCTGAGTCAGCGTGCTTGACAGCGCTCTGTCACAGTCAAAGATATGCGAATATTCCTCGTGAATAACTCAATGGGGGTTACACTCCTTCAGGT
phaw_30.0003546	1446-1725	RF00009	RNaseP_nuc	Gene	ribozyme	CCAGAGGAGAGTAGTCTGAATTGAGTTATGGTTACACCACCTCACTCATCCAACTTAACTATGCTAGGCAAGGGATCTTCCAGCCAAACCTGCTACCAACACCTCCTGCTGGAGCTAGGAAGCATCCAGCAGTCACAGGCATGGGGTGGCAGGCAGGGCACAGTATTTTCTGATGTCCCCCTACTCTTTTCAGANNNNNNNNNNNNNNNNNNNNNTTGCTGCCTCTTCTCTCAGACCTTCCCAAGGACCACAGCCCCTCATGGGTGAGATTCCTCTGGC
phaw_30.0000952	156890-157010	RF00001	5S_rRNA	Gene	rRNA	TCTAAAAGAAGCCTGGGTGTTTCCAGGCGGTCACCCATCCAAGTACTTACGAGACCCAACGTTGCTTAACTTCGCTGATCGGACGAGAGGCGGTGCATTCAACGTGGTATGGCCGTTGGA
phaw_30.0004121	23003-23121	RF00001	5S_rRNA	Gene	rRNA	GCCAACAGCATCTGGTGTTCCCAGGCGGTCACCCATCCAAGTACTAACCAGACCCAACGTTGCTTAACTTCGCTGATCGGACGAGAAGCGGTGCATTCAACGTGGTATGGCCGTTGGC
phaw_30.0005015	124694-124814	RF00001	5S_rRNA	Gene	rRNA	GAGTACTACATGCGAATTCTGTCGGGGAAGTCACCCAACCAAGTACTAACCAGACCCAACGAAACTTAACTTTGCTGATCGAAAGAAATGAAGCGCATTTTACCTGGTATGGCTGTTGGC
phaw_30.0005816	83946-84069	RF00001	5S_rRNA	Gene	rRNA	GAACACAGCCAATCGATGTGAGTTGAAGGCACCGCTTCTCGTCCGATCAGCGAAGTTAAGCAACTTTGGGTCTGGTTAGTACTTGGATGGATGACTGCCTGGGAACACCAGGTCTATGAAATT
phaw_30.0006983	161045-161163	RF00001	5S_rRNA	Gene	rRNA	GCCATTATCACATGGTGTTCCCAGGAGGTCACCCATCCAATTACAAACGAAATTCAACGTTGCTTAATTTTGCTGATCGAATGAGAAGCGGTTCATTCAGCGTGCTATGGACGCTGAC
phaw_30.0007427	8980-9098	RF00001	5S_rRNA	Gene	rRNA	CCCAACAGCATCTGGTGTTCCCAGGCGGTCACCCATCCAAGTCCTAACCAGACCCAACGTTGCTTAACTTCGCTGATCGGACGAGAAGTGGTGCATTCAACGTGGTATGGCCGTTGGC
phaw_30.0007427	9718-9844	RF00001	5S_rRNA	Gene	rRNA	CCAACGGCCATACCACGTTGAATGCACCGCTTCTCGTCCGATCGTCCGATCAGCGAAGTTAAGCAACGTTGGGTCTGGTTAGCACTTGGATGGGTGACCGCCTGGGAACACCAGATGCTGTTGGCT
phaw_30.0008008	17774-17892	RF00001	5S_rRNA	Gene	rRNA	GCCAACAGCATCTGGTGTTCCCAGGCGGTCACCCATTCAAGAACTAACCAGACCCAACGTTGCTTAACTTCGCTGATCGGACGAGAAGCAGTGCATTCAACGTGACATGGCCGCTGCC
phaw_30.0008672	88993-89165	RF00001	5S_rRNA	Gene	rRNA	CTAACGGCCATACCGCATTAAATGCACCGCTTCTCGTTCGATCAGCGAAGTTATGCAACGTGGGTCTGGTGTTCCCAGGCGGTCACCCATCCAAATACTAACCAGACCCGACGTTGCATAACTTCGCTGATCGAACAAGAAGCGTTTCATTCAATGTGGTATGGCCGTTAGC
phaw_30.0013027	7331-7436	RF00001	5S_rRNA	Gene	rRNA	CCAACGGCCATACCACGTTGAATGCACCGCTTCTCGTCCGACAGCAAAGTTAAGCAACGTTGGGTCTGGTTAGTACTTGGATGGGTGACCCATTCACTTTTGTCA
phaw_30.0014451	38278-38396	RF00001	5S_rRNA	Gene	rRNA	CCAACGGCCATACCACGTTGAATGCACCGCTTCTCGTCCGATCAGCGAAGTTAAGCAACGTTGGGTCTGGTTAGTACTTGGATGGGTGACCGCCTGGGAACACCAGATGCTGTTGGCT
phaw_30.0017232	37483-37590	RF00001	5S_rRNA	Gene	rRNA	GACCACAAGGGTCCGCCAGTGGGTAGGTTCTACTAACCAGACCCAACGTTGCTTAACTTCGCTGATCGGACGAGAAGCGGTGCATTCAACGTGGTATGGCCGTTGGC
phaw_30.0017232	42132-42250	RF00001	5S_rRNA	Gene	rRNA	GCCAACAGCATCTGGTGTTCCCAGGCGGTCACCCATCCAAGTACTAACCAGACCCAACGTTGCTTAACTTCGCTGATCGGACGAGAAGCGGTGCTTTCAACGTGGTAAGGCCGTTGGC
phaw_30.0017232	43352-43470	RF00001	5S_rRNA	Gene	rRNA	GCCAACAGCATCTGGTGTTCCCAGGCGGTCACCCATCCAAGTACTAACCAGACCCAACGTTGCTTAACTTCGCTGATCGGACGAGAAGCGGTGCATTCAACGTGGTATGGCCGTTGGC
phaw_30.0017232	48308-48425	RF00001	5S_rRNA	Gene	rRNA	GCCAACAGCATCTGGTGTTCCCAGGCGGTCACCCATCCAAGTACTAACCAGACCCAACGTTGCTTAGCTTCGCTGATCGGACGAGAAGCGGTGCATTCAACGTGGTAGGCCGTTGGC
phaw_30.0019501	26377-26497	RF00001	5S_rRNA	Gene	rRNA	CCAACGGCCATACCACGTTGAATGCACCGCTTCTCGTCCAATCAGCAAAGTTAAGCAACGTCGGGTCTGGTGTTCTCAGGCGGTCACCCATCCAAGTACAAACCAGACCCAACGCTGCTT
phaw_30.0020283	21032-21146	RF00001	5S_rRNA	Gene	rRNA	CATAGACCTGGTGTTCCCAGGCGGTTATCCATCCAAGTACTAACCGGACCCAACGTTGCTTAACTTCGCTGATCGGACGAAAGCGGTACCTTCAACTCACATCGATTGGCTATA
phaw_30.0021223	40532-40650	RF00001	5S_rRNA	Gene	rRNA	GCCAACAGCATCTGACATTCCCGGGCAAACACCCATCCAAGTGCTGACCACACCCAACGTTGCTTTACTGCGCTGATCGGACGAAAATCGGTACATTCATCGTAGTACGGCCGTTGGC
phaw_30.0021473	1-119	RF00001	5S_rRNA	Gene	rRNA	GCCAACAGCATCTGGTGTTCCCAGGCGGTCACCCATCCAAGTACTAACCAGACCCAACGTTGCTTAACTTCGCTGATCGGACGAGAAGCGGTGCATTCAACGTGGTATGGCCGTTGGC
phaw_30.0059859	314-434	RF00001	5S_rRNA	Gene	rRNA	GTTGCGGCCATATCTACCAGAAAGCACCGTTTCCCGTCCGATCAACTGTAGTTAAGCTGGTAAGAGCCTGACCGAGTAGTGTAGTGGGTGACCATACGCGAAACTCAGGTGCTGCAATCT
phaw_30.0079262	35-150	RF00001	5S_rRNA	Gene	rRNA	CCTGGCAGTTCCCTACTCTCGCATGGGGAGACCCCACACTACCATCGGCGCTACGGCGTTTCACTTCTGAGTTCGGCATGGGGTCAGGTGGGACCACCGCGCTACGGCCGCCAGG
phaw_30.0087005	178-298	RF00001	5S_rRNA	Gene	rRNA	TCAGCTTTCATACCAAGCTGAAAATGCACCGCTTCTCATTCGATCAGCAAAGTTAAGCAACGTTGGGTTTGGTTTGTATTTGGATGGGTGACCGCCTGGGAACACCATATGATATTGGCT
phaw_30.0324303	90-205	RF00001	5S_rRNA	Gene	rRNA	TTCAAAGGAATAGAACTCAATGAGTTTTCCCATCCAAGTACTAACCAGACCCAACGTTGCTTAACTTCGCTGATCGGACGAGAAGCGGTGCATTCAACGTGGTATGGCCGTTGGC
phaw_30.0001058	27927-28097	RF02543	LSU_rRNA_eukarya	Gene	rRNA	TGCCCAGGGTGGTGCATCTGTCAAACAATAATGCAGGTGTCCCAAGGCCAGCTCCACGAGAAGAGAAATCTCGTGTGGAGAATTAGGGCCTATGCTGGCTTGATCTCGACTCCCAGTATGAGTATGGGCAGTGAAAGCCAGGCCTCACGACCCTTCTGTTGTCAAAGGAG
phaw_30.0003622	34255-34935	RF02543	LSU_rRNA_eukarya	Gene	rRNA	ACCACGTAGGTAAGGGAAATCGGCAAGCTCGATCCCTAACTTCGGAAGAAGTATTGGCTCTGAGGGTCGAATGCAGGCCGACACCCCACAGTTTGCTCGCGCACACCAATGTCTGGCGAATTGTTTGTAGCCAGACGGTGTTTGCGTGTGTGGGGCGTGCCGCTGTCGCCGCTTGTGCCTTCGTGCTCTTGCGTGCGAGCGCCGTGGGCCAGCGAGTGTCGGGCTTTTGGAGGGACTCTGGCGTNNNNNNNNNNNNNNNNNNNNNTGTGGTGCGTGGCTTCCCCTGCACTTCTGTGTGGGTGTGTCGCTGCCTCCCGCGCTGGGTCTTTCTTCCCGCGCTTGCTTTGGCAGTGCCTGCGTGCGTGGCGTGTCCTTGTGTCCTTGCTCCGCGTGCTCCTT…
phaw_30.0004021	82579-82689	RF02543	LSU_rRNA_eukarya	Gene	rRNA	AGCGCTCCCAAGGCCCAGCCTCCACCTCGCTAAGGGAATTACATAGGCCGACATTGAAGGATCAAAAAGCGACGTCGCTAAGGACGCTTGGCCGCCACAAGCCAGCTATC
phaw_30.0005147	110557-110707	RF02543	LSU_rRNA_eukarya	Gene	rRNA	ACCATGGTCAGAAAACGCAACGCGTCAACACCCAGTAGACGAACAATCCAACCCTATGGGCAGGTTGCCACTCAACGGTAGTAGGAGCCGACATCGAAGGATCCAAAAGGGACGTCACCATGGACGCTTGGTCGCCACAAGCCAGTTATC
phaw_30.0005692	128968-129137	RF02543	LSU_rRNA_eukarya	Gene	rRNA	TTACTATAACAACAAAAGGATCGTGAGGCCTGGCTTTCACCGTCCATACTCTTACTGGGAGTCGGGATCAAGCCAGCATAGGCCCTTATGCTCCACACGAGATTTGCGTTCTCGTTGAGCTGGCCTTGGGACACCTGCGTTATCGTTTGACAGATGTACCGCCCCAGTC
phaw_30.0005986	121686-121836	RF02543	LSU_rRNA_eukarya	Gene	rRNA	ACTGGGGCGGTGCATCTGTCAAACGATAACGTAGGTGTCCCAAGGCCGGCTCAACGAGAACGAAAATCTTGTGTGGAGCATAAGTGAGATCTTGGGACAAACCGTGGTTTGACGATTAGTGTCGTTTAGCTTTCGAAGCTAAACAAGCGG
phaw_30.0007324	1-679	RF02543	LSU_rRNA_eukarya	Gene	rRNA	CGGGGGTCGGTAGGGACTTGTCCCAACTCGCCCGGAATCTTCTCCTCCTCCCGGCGGCCCCTACTCTAAATGATGACACGTTTCTTCGCAAGCCGTGTTGCCAGTTGGCCCCTTGTTGGTGCAGCGAGAAACTAGTTCTGATAGCCAAATGTCTCGTCATCTAATTATTGACGCGCATGAAGGATTAATGAGATTCCCACTGTCCCTATCTACATTCTGGTGAACCCACAGGCAAGGGAATGGACTTGCATGAACACAGCGGGGAAAGAAGACCCTGTTGAGCTTGACTCTCGTCTGAATTTGTGCGGAGACATCGGAGGTGCAGCCTAAGTGGGAGGTAGGCTCGTCGTGCCGGCACATGAGATACCACTACTCCCTTCGTCTCCGCACTCTACTCTG…
phaw_30.0008737	55369-55448	RF02543	LSU_rRNA_eukarya	Gene	rRNA	CATTCATGCGCGTCACTAATTAGATGACGAGGCATTTGGCTACCTTAAGAGAGTCATAGTACAGCTCGTACGTGTTAGA
phaw_30.0017401	42465-42710	RF02543	LSU_rRNA_eukarya	Gene	rRNA	GTCGGGGCTTTGAGACTTAGAGCATTATGGTGATGCCAAGAAGTATTTACTGCCACCGACGGTCATGCATCGGGAGAGAGCTTTAGTGCCATCCATTTTCAGGGTTGCTCGCTTTGACAGGATTAGTTGTTACACTCTACTTAGCGGATGTCAACTTCCATGACCACCGTCCTGCTGTCTTCAGCCAGCAGCACCCTTCCAATGGGATTAAGAGAGAGCTGTCTTTAGGCCCCTTAGCATAATGT
phaw_30.0034472	21854-22889	RF02543	LSU_rRNA_eukarya	Gene	rRNA	CCGCGGAGCACACATGCTATGACCCGAAAGATAGTGAACTATGCCTGACGAGGGTGAAGCCCCAGGAAACTGGGGTGGAGGCCCGTAGCCGTTGTGACGTGCAAATCCATGGCGTCAGTTGGGCATAGGGGCGAAAGACCAATCGAACTATCTAGTAGCTAGTTCCACCCGAAGTTTCTCTCAGGATAGCTGATCCGCTGCAAGTTACTTGCTCTGGTGGGCGGCTCCTGCCTCTGCTCTTGCCTGCACGCGCACGGGGATTTGACTTTGGTTTGGAGTGAAACAGTTTCAACTGGCAAAGAGAATGACAATAGCTACTGGGCTGTGCACGCACGCACCTCATGGTGTATGTCTGTGTAAGCACGTTGGGGCAGGGATGTGTAACACCATGCACTATAC…
phaw_30.0035174	15862-15967	RF02543	LSU_rRNA_eukarya	Gene	rRNA	TTAGTGCCATCCATTTTCAGGGTTGCTCGCTTCGGCAGGATTAGTAGTTACACCTACTTAGCGGATGTCAACTTCCATGACCACCGTCCTGCTGTCTTCAGCCGT
phaw_30.0085757	1-170	RF02543	LSU_rRNA_eukarya	Gene	rRNA	TTAGCGACGTCGCTTTTTGATCCTTCGATGTCGGCTCTTCCTACCGTTGAGTGGCAATCTGCCCCTAGGGTTGGATTGTTCACCCGCTGCAGGGAACGTGAGCTGGGTTTAGACCGTCTCTGGACAACCGCTACATCGGGCTTACTAGGATGACGCTGCAAAATAGGTT
phaw_30.0097374	731-1665	RF02543	LSU_rRNA_eukarya	Gene	rRNA	ACTAAGCGCTCCCAAGGCCCAGCCTCCACCTCGCTAAGGGAATTACATAGGCCGACATCGAAGGATCAAAAAGCGACGCCGCTAAGGACGCTTGGCCGCCACAAGCCAGCTATCCCTGTGATAACTTTTCTGATACCACTTGCTAGAAACTCACTATAACAACAAAAGGATTAGCATGAAGCAAATTACAGACCTATTGCCCAGGCCTTCTCAGGTTGCCGGGTAGCTGATATGCGGATGTTGTCATTTCAGGAGTGTTACAGCTTGTTTCTTGGTGTGGTGTAGGACTGGTTGACTTCTATGTTCCAGTGATCGAGGGTGAGAGGAGCCCCGTGGAGGGTTGCAACCACCTTGGAGGCTTTATTGGGATCATGCACAGACGTGAAGAGATGACAAGCA…
phaw_30.0106796	1-1004	RF02543	LSU_rRNA_eukarya	Gene	rRNA	AGGGTTGCTCGCTTCGGCAGGCTTAGTTGTTACACACTACTTAGCGGATGCCAACTTCCATGACCACCGACCTGCTGTCTTCAGCCAGCAGCACCCTTCCAATGGTATCAAGAGAGAGAGCTGTCTTTAGGCCCCTTAGCATGACGTGAGGTTCATCCCTCATAATCAGTCCTGCTTACCAGAACAGACCCACTGAATCCGCCACTTCTGATCAGGCGACACACTTATGCCTTGTCGAGCCATGCACATTCCCAAGCGCAGGAGGCAACCAGGAGCAAAACAGAAACAACAGAGATATGAGGCCAAGCTTGCACGAGGGGACGGGTTCTCCAACCAGCACACTCAAAAAAGAGAGTGGAGCCCGGGACACTCTGATCATTCAACGTTTGAGTATAGTGC…
phaw_30.0111235	1-1322	RF02543	LSU_rRNA_eukarya	Gene	rRNA	GAACTCTTGATCAACTGATTATTTATAATAATCACTGTTAAAGCTTTCCGGAGTGCGGCGGTGCATGACCACTTGCTACATGGAAATTTTCAGAATTTTCTGAGGCTTAGTTTTTGGAGTAAGGGAAGTGCAGTACTTCACTGGAATTTTCCAAGCTATTGGGAACTAAATACACTGTTAGTTCGTTCTTTCTACTAGTACTAAGGTACGGTACTTAAAGAATATCCTGACCTTTCGCCTTTCGAGACAGTACGAAATAATTGTACTGTCTACCTTTGGCGGCCACTCTTAGACTAAGGCCGCTAACTGACTTACAGAGGTCCAGGGTCTTACCCCTGGAAGCTCAGAAGATACATGGTTGCCGTGAACTCAACGAGTCGAAAGGCCCTAGCAGAGTAT…
phaw_30.0137305	1-981	RF02543	LSU_rRNA_eukarya	Gene	rRNA	AGTGCAGGGGGAAGCCACGCACCACACGCCAGAGTCCCTCCAAAAGCCCGACACTCGCTGGCCCACGGCGCTCGCACGCAAGAGCACGAAGGCACAAGCGGCAACAGCGGCACGCCCCACACACGCAAACACCACCTGGCTACAAACAATTCTCCGGGCATTGGTGCTCGCGAGCGAACTGCGGGGTGTCGGCCTGCATTCGACCCTCAGAGCCAATACTTCTTCCGAAGTTAAGGATCGAGCTTGCCGACTTTCCTTGCCTACGTGGTTCTGATTATGCAGAGGCTACGAACCTTGGAGACTGGATGCGGATGTGGGTACGATTCGTCTCGATCATGTCGGACGTTTCAGACCATTCATTCAACAACACAAAGGGCACGCGCGCGCGCGCAAGTGGGC…
phaw_30.0160533	1-801	RF02543	LSU_rRNA_eukarya	Gene	rRNA	GAGCCGCCGGTAATGCAGATCTTGGTGGTAGTAGCTAATGCCTCAGTGAGTAACCTGGGGCTGTGAGGCGGATAAGGGTTCCATGTCAACAGCAGTTGAATATGGTGTAGTCGTACCTGAGCCAGCTGTGAAAGCAGTGGCAGATCGTAAACGGAGCGAAAAGTGTGCGTGGGCTTATGCGCGCACGTCTCTTCTTTGTATGTGTCGTGGCTTGGCTTTGCATATATGCACACGTGTCTTGGCTTTGGAGACACGCAGGGTGTGTCGTGTTAATGTTTGAATGATCTATACCTGTAATATGCGTAAGACCTGGTCGCCATGCCAGGCCGCTAGCAGTGTTACACACACACACACCTCTGTCTCTGGGACCGCGTGCGAGAGTATATGCGCCACGTGAGA…
phaw_30.0204976	1-594	RF02543	LSU_rRNA_eukarya	Gene	rRNA	ACTCTGGGGAATCGAGAGAAGTCTTGGACAAACATTGCCCAATTCCCTTTCGCCAGGTAGATCGAGTTCGGTGTGAATATCATTCAAACAATGTGCGAGCGCGCGCACAGACGTCTCAGTGGCGCACACACACACGCGCGCTTCGAGAGAGAGCTGTGTAACACTGCTAGCAGCCTGGCATGGCGACCAGGTCTTACGCATACTACAGGTAGATCATTCAAACATTTAACACCACAATCTCTCTCCATTGCCAAAACACGTGCATATATGCAATGCCAAGCCACGATACACACAAGAGACGTGCGCGCGCGCATGCCCACGCACTTTTCGCTCCGTTTACGATCTGCCACTGCTTTCACCTGCTGGCACAGGTACGAGTTCACCATGCACAACTGCTGT…
phaw_30.0229555	1-514	RF02543	LSU_rRNA_eukarya	Gene	rRNA	CCCGACACTCGCTGGCCCACGGCGCTCGCACGCAAGAGCACGAAGGCACAAGCGGCGACAGCGGCACGCCCCACACACGCAAACACCGCCTGGCTACAAACAATTCGTCAGGCATTGGCGTGCGCGAGCAAACTGTGGGGTGTCGGCCTGCATTCGACCCTCAGAGCCAATACTTCTTCCGAAGTTAGGGATCGAGCTTGCCGACTTCCCTTACCTACGTGGTTCTGATTATACAGAGGCTACGGACCTTGGAGACTGGATGCGGATGTGGGAACGATTCGTCTCGATCATGTCGGACGTTTCAGAGGCCATTCATTCAACAACACAAAGGGCACACGCGCGCGCGCAAGCGTGCACACACACACCCTCGTGAAACCTTCAGAACAACTTTCCCCGAGT…
phaw_30.0274998	1-405	RF02543	LSU_rRNA_eukarya	Gene	rRNA	AAAACAAAGCGTCGCGACGGCCCCTGTTGGGTGTTGACGCGACGTGATTTCTGCCCAGTGCTCTGAATGTCAAAGTGAAGAAATTCATCGAAGCGCGGGTTAACGGCGGGTGTAACTAAAGTCTAAATTTGAGTTAATTGTTCTCCTATATTCTGTCGCCGTTGAAGGATCCGTAGCCCGTCCGTCTCTGTAATAGTATGGCACCCAAAATTATTAACGGAGCTTGCAGCAGCATAGCAGTTGGTATTGGATAATGGTTTACAAGAGCTGCGAGCAATACTCTCGACCAAGTACTAATGTCATAACTTTTTTTTGGTCAAATACTTTTGTCCCTCATTACTTCTGCTTGTGTTAAATTTTCTTGTTATCAGTGCACATTTGACTATTCTGTTTAAACAT…
phaw_30.0321639	1-327	RF02543	LSU_rRNA_eukarya	Gene	rRNA	GAGAGCTGTGTAACACTGCTAGCAGCCTGGCATGGCGACCAGGTTTCCCGCATATTACAGGTAGATCATTCAAACATTTAACACCACACTCTCTGTCCATTGCCAAAACACGTGCATATATGCAATGCCAAGCCACGTTACACACAAACAAGAGACGTGCGCGCACGCATGCCCACGCACTTTTCGCTCCGTTTACGATCTGCCACTGCTTTCACAGCTGGCACAGGTACTATTTCACCATGCACAACTGCTGTTGACATGGAACCCTTATCCACCTCACAGCCCCAGGTTACTCACTGAGGTATTAGCTACTACCACCAAGATCT
phaw_30.0341814	243-297	RF02543	LSU_rRNA_eukarya	Gene	rRNA	CCGTTAACCCGCGCTTCGATGAATTTCTTCACTTTGACATTCAGAGCACTGGGC
phaw_30.0003622	27493-27622	RF01960	SSU_rRNA_eukarya	Gene	rRNA	CGCCCGTCGCTACTACCGATTGGGTGTACCAGTGAGAACCTTGGACTGGCGTCCAGTGCCTTGCGCACCTGGGTCTGACGGAAAGAGGCTCGAACTGGTGCACTTAGAGGAAGTAAAAGTTGTAACAAG
phaw_30.0004527	162900	RF01960	SSU_rRNA_eukarya	Gene	rRNA	TTCAATCGGTACTAGCGACGGGCGGTGTGTACAAAGGGCAGGGACGTAATCAATGCGAGTTAATGACTCACACTTACTGGGAATTCCAAGTTCATGTGAACAGTTTCAGTTCACAATCCCAAGCATGAAAGTGGTTCAGCGGTTTACCCGGACCTCTCGGTCTAGGAAATACACGTTGATACTTTCATTGTAGCGCGCGTGCAGCCCAGGACATCTAAGGGCATCACAGACCTGTTATTGCTCAATCTCATTATTGCTAGACGCAATTTGTCCATTTAAGAAGCTAGTGTCCTTATAATGGGACAAACCAACAGGTACGGCTCCACTTACATAAACACATTCAAACACAATAAGCATTTTNNNNNNNNNNNNNNNNNNNNNNNNNNNNNNNNNNNNNNN…
phaw_30.0004808	195737-195855	RF01960	SSU_rRNA_eukarya	Gene	rRNA	TAACGATGCAGGCGCTTTTTTGGAGCCCGCAATCAGCATGAGTATGTCTTAAATAACCCGACGAGAACCCACTGAAGGGCAAGTCTGGTGCCAGCGGCCGCGGTAATTCCAGCTTCAT
phaw_30.0011719	42745-43136	RF01960	SSU_rRNA_eukarya	Gene	rRNA	TCTTACTAGGACAGCACTCAGGCATGATTGACAGATTGAGAGCTCTTTCTCGATTCAGTGGACGGTGGTGCATGGTCGTTCTTAGTTGGTGGAGCGAGCTGTCTGGTTAATTCCCATAAGGAACGAGACTCTCCTCTGCTAATAGTCGGCTGGATCTTCAATTGCTGAGTCGCTCATTGCCTCTTGTAGTGCGCCCGCCGTTTCTAGGTTATCCCCTGAAGTAGTTGTGATAGTTATTTAAACGGCACTGTGTATACGGTTTTGGCCCAGGTGATGGACGATGGCGGTTGACCTGTTTCAAGTTTTGTATTCAGACCAATGCTGCAAGCAGAGATTCTGCCGGAAGATAATATATCTCAGCCACGGGCATACACAATAAGCCCTATTTTCG
phaw_30.0018692	53186-54327	RF01960	SSU_rRNA_eukarya	Gene	rRNA	CATGATTCTTCTGCAGCTTCACTCACGGAAACCGTGTTACGACTCTTACATCCTCTGCGTGCCCCAGTTCGAACCTCTTTCCGTCAGACCCAGATGCGCAAGGCACCGGACACCAGTCCAAGGTTCTCACTGGTACTCCCAATCAGTAATAGTGGCTTCTAGAGCCGTCAATTATCACGATTGATGAACACGTCATTGGCAGACGCCTNNNNNNNNNNNNNNNNNNNNNCTCTTTCCGTCAGACCCAGATGCGCCAGGCACCGGACGCCAGTCCAAGGTTCTCACTGGTACTCCCAATCAGTAATAGTGGCTTCTAGAGCCGTCAATTATCACGATTGGTGAACACGTCATTGGCAGACGCCTTCGCTTTAGGAGGTTTTGCGGGGGTCGCAGAATTTC…
phaw_30.0034243	18718-19051	RF01960	SSU_rRNA_eukarya	Gene	rRNA	TCTAAGTACGAGCTGTGTTTAGATGGCGATACCGCGGACGGCTCATTAAATCAGTCGTGGTCTAAATGGGTCAGTTCTCAAGGTATACTTGAATAACCGTGGTAATTCCAGAGCTAATACATGCAACTCACATCCCGAGGGGCTTGGCGCTCGCGCGTTCTTGTTCCCGACGGAAGCACTTAGTAGAGCAAGAATTGTTGAGAATTACTGACGACAATAAAAGTGATTGAGGGCAATGGTCTCGAGCAAAAAGGTAGAAAACTTCTGGTTCGAGCAAAATGCTTTGTATATCCACGATATCGAGCAAAAATTGTGAGAGCTACTGTTTTCGAG
phaw_30.0085262	1-939	RF01960	SSU_rRNA_eukarya	Gene	rRNA	CCTGTGGCTGAGTCCGACACCGGAGCCTGTGGCAAAGTCACGTTTGAGTGTTTGCTCGATGTGGCTGTGGGTGTTTGACGCCCGAGACCTTGTCTTAAGACAGAGGGCGAAAATGAGATCGTGGCTCAAATGCCTGGCTTTGCATGGTCGTTTGACGGTCTGGGCGTCCTGTGAACCCTAGGTATAGGGTTCCGAATGGCGGCAAAGTCGGCGCTGGTCCCGCCTTGGCATGACTTTCCCCCCAATCCCGCTGTGCTGAATCGTTCTTATGCACATGGAATGTTGATTTGGAAGGTTTTGCCTCACGTGGGGCATGAGGCAAACCTACTCTGGTAAGCAAATGGCAGTACCGAGGCTCTCATATCTGGCAAAGACGTGAGGGAAGATTCTCACACTGGT…
phaw_30.0120336	829-1080	RF01960	SSU_rRNA_eukarya	Gene	rRNA	CATGATTCTTCTGCAGCTTCACTCACGGAAACCGTGTTACGACTCTTACATCCTCTGCGTGCCCCAGTTCGAACCTCTTTCCGTCAGACCCAGATGCGCCAGACACCGGACGCCAGTCCAAGGTTCTCACTGGTACTCCCAATCAGTAATAGTGGCTTCTAGAGCCGTCAATTATCACGATTAGTGAACACGTCATTGGCAGACGCCTTCGCTTTAGGAGGTTTTGCGGGGGTCGCAGAATTTCACCTCTC
phaw_30.0165550	1-115	RF01960	SSU_rRNA_eukarya	Gene	rRNA	ACGACTGATTTAATGAGCCGTCCGCGGTATCGCCGTGTAAACACAGCTCGTACTTAGACATGCATGGCTTAGCCTTTGAAACAAGCATATGCTACTGGCAGGATCAACCAGGCA
phaw_30.0255994	2-445	RF01960	SSU_rRNA_eukarya	Gene	rRNA	CATGATTCTTCTGCAGCTTCACTCACGGAAACCGTGTTACGACTCTTACATCCTCTGCGTGCCCCAGTTCGAACCTCTTTCCGTCAGACCCAGATGCGCCAGGCACCGGACGCCAGTACAAGGTTCTCACTGGTACTCCCAATCAGTAATAGTGGCTTCTGGAGCCGTCAATTATCACGATTAGTGAACACGTCATTGGCAGACGTCTTCGCTTTAGGAGGTTTTGCGGGGGTCGCAGAATTTCACCTCTCGCCGCGCAATACCAATGCCAGCTAGTCTTCATTGATCATTACGTCACTATTGGCACGTGTTTCCGATACACAACAGCCGGTAACATGGGGTAACGTGTGTGTGTGTGTGTGTGTGGAAGAGAGTCAAAGCACGGACGTGTAAAAGCCC…
phaw_30.0001167	17557-17751	RF01848	ACEA_U3	Gene	snRNA	snoRNA	CD-box	|RF00012	U3	Gene	snRNA	snoRNA	CD-box	ACCACTCGGCCGGCGAACAGCCACTCCCCGCCGCGAGAGCGGGGAACGGTCATCAGATTCACAGAGTATAAACTCAGTGAACAGTTTCCCGCTCACGACTGCCCGCTGAACTCGTCATCGTGGTGTAGGGTTAGAGTCTTAGCTCTAGGTTAATGACAACATACTATAGAAATGATCCTTTGAAGTATGGTCAT
phaw_30.0003986	81356-81555	RF01848	ACEA_U3	Gene	snRNA	snoRNA	CD-box	|RF00012	U3	Gene	snRNA	snoRNA	CD-box	TGACCATACTTCAAAGGATCATTTCTATAGTATGTTGTCATAAACCTAAGAGCTAATACTCTTACCCTACCCCACGATGACGAGTTCTGCGGACAGTCTTGAGCGGGAAACTGCTTACAGAGCGTTTGCTTTGTGAGTCTGATGACCGTCTCTGTTCTCAGTAAAGAGAGAGGGAGGGGCTGTTCGCCGGCCGAGTGGT
phaw_30.0011991	8975-9174	RF01848	ACEA_U3	Gene	snRNA	snoRNA	CD-box	|RF00012	U3	Gene	snRNA	snoRNA	CD-box	TGACCATACTTCAAAGGATCATTTCTATAGTATGTTGTCATTAACCTAAGAGCTAACACTCTTACCCTACCCCACGATGACGAGTTCAGCGGGTAGTCTTGAGCGGGAAACTGCTCTCAGGGTGACTGCTCTGTGAGTCTGATGACCGTCTCTGGTCTCAGTAATGAGGCAGGGAAGGACTACTCGCCGGCTGAGTGGT
phaw_30.0012926	27085-27284	RF01848	ACEA_U3	Gene	snRNA	snoRNA	CD-box	|RF00012	U3	Gene	snRNA	snoRNA	CD-box	TGACCATACTTCAAAGGATCATTTCTATAGTATGTTGTCATTAACCTAAGAGCTAACACTCTTACCCTACCCCACGATGACGAGTTCAGCGGGTGGTCTTGAGCGGGAAACTGCTCTCAGGGCGCCTGCTCTGTGAGTCTGATGACCGTCTTTGTCCTCAGTGATGAGGCAGGGAAGGACTACTCGCCGGCTGAGTGGT
phaw_30.0022579	6233-6432	RF01848	ACEA_U3	Gene	snRNA	snoRNA	CD-box	|RF00012	U3	Gene	snRNA	snoRNA	CD-box	TGACCATACTTCAAAGGATCATTTCTATAGTATGTTGTCATTAACCTAGAGCTACGACTCTAACCCTACTCCACGATGACGAGTTCAGCGGGCAGTCGTGAGCGGGAAACTGTTCACTGAGTGCATGCTCTGTGAATCTGATGACCGTTCCTCGCTCTCGGTGACGAGGCGAGGAGTGGCTGTTCGCCGGCCGAGTGGT
phaw_30.0026260	27027-27226	RF01848	ACEA_U3	Gene	snRNA	snoRNA	CD-box	|RF00012	U3	Gene	snRNA	snoRNA	CD-box	CCACTCGGCCGGCGAACAGTCCTTCCCTGCCTCATTGCTGAGAACAGGGACGGTCATCAGACTCGCAAAGCTGACGCTCTGTAAGCAGTTTCCCGCTCAAGTCTGTCCGCTGAACTCGTCATCGTGGGGTAGGGTAAGAGTGTTAGCTCTTAGGTTTATGACAACATACTATAGAAATGATCCTTTGAAGTATGGTCAT
phaw_30.0004239	107315-107439	RF00286	SCARNA8	Gene	snRNA	snoRNA	scaRNA	ATTGTCAGCTCCGTATCTGTCCGCATTCATAACTCGTAGAAATGCAGTCATCAGAGAGCATATTTTTATCTATGGACTCCAAGTAACATGATATGGCTTGCCATACATGTGTATCATAGCCCAG
phaw_30.0004239	114022-114146	RF00286	SCARNA8	Gene	snRNA	snoRNA	scaRNA	ATTGTCAGCTCCGTATCTGTCCGCATTCATAACTCGTAGAAATGCAGTCATCAGAAAGCATGTTTTTATCTATGGACTCCAAGTAACATGATATGGCTTGCCATACATGTGTATCATAGCCCAA
phaw_30.0025188	43967-44091	RF00286	SCARNA8	Gene	snRNA	snoRNA	scaRNA	ATTGTCAGCTCCGTATCTGTCCGCATTCATAACTCGTAGAAATGCAGTCATCAGAAAGCATGTTTTTATCTATGGACTCCAAGTAACACGATATGGCTTGCCATACATGCGTATCATAGCCCAA
phaw_30.0025188	48755-48879	RF00286	SCARNA8	Gene	snRNA	snoRNA	scaRNA	ATTGTCAGCTCCGTATCTGTCCGCATTCATAACTCGTAGAAATGCAGTCATCAGAAAGCATGTTTTTATCTATGGACTCCAAGTAACATGATATGGCTTGCCATACATGTGTATCATAGCCCAA
phaw_30.0085211	56-179	RF00190	SNORA16	Gene	snRNA	snoRNA	HACA-box	ATGGCTCATATCGAAGCTGTGGTGTCCTCGGATGGCCATGGTCAAAATTGAGCCATAGTAAACATGCATCTGACGGTCGCTAAGGTTCATATGAACTACGGCATACTATAGATGCTTACATTT
phaw_30.0000269	385249-385454	RF00563	SNORA53	Gene	snRNA	snoRNA	HACA-box	GCCCGCTCCTTAGATCCACTGTCGGGGTCGCCACAGACCCGCCAGCTTTATGGCTGGATCAGGCAGTGCTTGAGTCATTGGTGGGCGAGAGCAGCAAACTGGTAGTGGTGCTTTGGGTCTGCAGCAGGCAGCCTTTCGGTGGTTCTGCCGCCGGAGGGCGACTGGCATCAGTCAAGCCCCAGAGCTCAGCCCGTGTACCGCTACC
phaw_30.0011980	49326-49532	RF00563	SNORA53	Gene	snRNA	snoRNA	HACA-box	GCCCGCTCCTTAGATCCACTGTCGGGGTCGCCACAGACCCGCCAGCTTTATGGCTGGTATCAGGCAGTGCTTGAGTCATTGGTGGGCGAGAGCAGCAAACTGGTAGTGGTGCTTTGGGTCTGCAGCAGGCAGCCCTTCGGTGGCTCTGCCGCCGGAGGGCGACTGGCATCAGTCAAGCCCCAGAGCTCAGCCCGTGTACCGCTACC
phaw_30.0004712	333775-333842	RF00093	SNORD18	Gene	snRNA	snoRNA	CD-box	TTCGATGATGATTACCATATTTGGTCCGTGTTTATGATCACCTTGATTTTAACAAGTTGCTGATACT
phaw_30.0004712	334345-334412	RF00093	SNORD18	Gene	snRNA	snoRNA	CD-box	TGTTGTGATGATTACCATATTTGGTCCGTGTTTATGATCACCTTGATTTTAGAAAGTTGCTGATTAA
phaw_30.0039745	11347-11416	RF00089	SNORD31	Gene	snRNA	snoRNA	CD-box	CAGTTTCAGCATAACCGAATCATTCACGGAGAAGTCAGACTGGGGCGGTAAACAATCATCAGAAACAAG
phaw_30.0003840	6336-6498	RF00003	U1	Gene	snRNA	splicing	GGGGGATAGCGCGAACGCAGTCCCCCGCTACCAAAAATTACGCACCCGAGTTACCCACATTTGGGGTAATCGCAAGGGTCAGCAACACCGAAGTGCAATGGTGAGCCTCGCCCTGGGGGAACCGCCTTCATGATCACGGTCTCCCCTGTGCCAGGTAAGTAT
phaw_30.0003840	10780-10942	RF00003	U1	Gene	snRNA	splicing	GGGGGATAGCGCGAACGCAGTCCCCCGCTACCAAAAATTACGCACCCGAGTTACCCACATTTGGGGTAATCGCAAGGGTCAGCAACACCGGAGTGCAATGGTGAGCCTCGCCCTGGGGGAACCGCCTTCATGATCACGGTCTCCCCTGTGCCAGGTAAGTAT
phaw_30.0003840	13072-13234	RF00003	U1	Gene	snRNA	splicing	GGGGGATAGCGCGAACGCAGTCCCCCGCTACCAAAAATTACGCACCCGAGTTACCCACATTTGGGGTAATCGCAAGGGTCAGCAACACCGGAGTGCAATGGTGAGCCTCGCCCTGGGGGAACCGCCTTCTTGATCACGGTCTCCCCTGTGCCAGGTAAGTAT
phaw_30.0003840	18862-19019	RF00003	U1	Gene	snRNA	splicing	AGGAGAGCGTTAAAACACTCCCCCGGCTAACAAAAACTACACACCGGCGTTAGCCCAGGGTGCTACAACACCTTACAATTGCGAAATGGCGAGTAACACCCTGGAGGAAGGCCGCCTTCTTGATCACGGCACGTAGTCCTCGGTGTGATCCAAGCAT
phaw_30.0003840	40227-40389	RF00003	U1	Gene	snRNA	splicing	TACTTACCTGGCACAGGGGAGACCGTGATCAAGAAGGCGGTTCCCCCAGGGCGAGGCTCACCATTGCACTCCGGTGTTGCTGACCCTTGCGAATACCCCAAATGTGGGTAACTCGGGTGCGTAATTTTTGGTAGCGGGGGACTGCGTTCGCGCTATCCCCCT
phaw_30.0003840	47670-47832	RF00003	U1	Gene	snRNA	splicing	GGGGGATAGCGCGAACGCAGTCCCCCGCTACCAAAAATTACGCACCCGAGTTACCCACATTTGGGGTAATCGCAAGGGTCAGCAACACCGGAGTGCAATGGTGAGCCTCGCCCTGGGGGAACCGCCTTCATGATCACGGTCTCCCCTGTGCCAGGTAAGTAT
phaw_30.0003840	55179-55355	RF00003	U1	Gene	snRNA	splicing	GGGGGATAGCGCGAACGCAGTCCCCCGCTACCAAAAATTACGCACCCGAGTTACCCACATTTGGGGTAATCGCANNNNNNNNNNNNNNNNNNNNNGCAACACCGGAGTGCAATGGTGAGCCTCGCCCTGGGGGAACCGCCTTCATGATCACGGTCTCCCCTGTGCCAGGTAAGTAT
phaw_30.0003840	57152-57309	RF00003	U1	Gene	snRNA	splicing	GGGGGATAGCGCGAACGCAGTCCCCCGCTACCAAAAATTACGCACCCGAGTTACCCACATTTGGGGTAATCGCAAGGGTCAGCAACACCGGAGTGCAATGGTNNNNNNNNNNNNNNNNNNNNNCATGATCACGGTCTCCCCTGTGCCAGGTAAGTAT
phaw_30.0006573	48706-48868	RF00003	U1	Gene	snRNA	splicing	AGGGGATAGCGCGAACGCAGTCCCCCGCTACCAAAAATTACGCACCCGAGTTACCCACATTTGAGGTAATCGCAAGGGTCAGCAACACCGGAGTGCAATGGTGAGCCTCGCCCTGGGGGAACCGCCTTCATGATCACGGTCTCCCCTGTGCCAGGTAAGTAT
phaw_30.0006573	59203-59304	RF00003	U1	Gene	snRNA	splicing	NNNNNNAATCGCAAGGGTCAGCAACACCGGAGTGCAATGGTGAGCCTCGCCCTGGGGGAACCGCCTTCATGATCACGGTCTCCCCTGTGCCAGGTAAGTAT
phaw_30.0006573	72514-72666	RF00003	U1	Gene	snRNA	splicing	AGGGGATAGCACAAACGCAGTCCCCCGCTACCAAAAATGATGCACCCGAGTTACCCAAATTTGGGGTAATCGCAGGATTCAGCAACACCGGAGTGAGCCTCGCCCTGGAGGAACCGCCGTCATGATCACGGTCCCCCTGTGCAGCTAAGTAT
phaw_30.0007039	57173-57335	RF00003	U1	Gene	snRNA	splicing	TACTTACCTGGCACAGGGGAGACCGTGATCAAGAAGGCGGTTCCCCCAGGGCGAGGCTCACCATTGCACTCCGGTGTTGCTGACCCTTGCGATTACCCCAAATGTGGGTAACTCGGGTGCGTAATTTTTGGTAGCGGGGGACTGCGTTCGCGCTATCCCCCT
phaw_30.0007039	64218-64341	RF00003	U1	Gene	snRNA	splicing	TACTTACCTGGCACAGGGGAGACCGTGNNNNNNNNNNNNNNNNNNNNNTGCGATTACCCCAAATGTGGGTAACTCGGGTGCGTAATTTTTGGTAGCGGGGGACTGCGTTCGCGCTATCCCCCA
phaw_30.0007039	67415-67577	RF00003	U1	Gene	snRNA	splicing	TACTTACCTGGCACAGGGGAGACCGTGATCATGAAGGCGGTTCCCCCAGGGCGAGGCTCACCATTGCACTCCGGTGTTGCTGACCCTTGCGATTACCCCAAATGTGGGTAACTCGGGTGCGTAATTTTTGGTAGCGGGGGACTGCGTTCGCGCTATCCCCCT
phaw_30.0007039	68718-68897	RF00003	U1	Gene	snRNA	splicing	TGTTTTCAGAGAGCGGAGNNNNNNNNNNNNNNNNNNNNNNNNNNNNNNNNNNNNNNNNNNNNNNNNNNNNNNNNTCACCATTGCACTCCGGTGTTGCTGACCCTTGCGATTACCCCAAATGTGGGTAACTCGGGTGCGTAATTTTTGGTAGCGGGGGACTGCGTTCGCGCTATCCCCCA
phaw_30.0007039	79364-79526	RF00003	U1	Gene	snRNA	splicing	TACTTACCTGGCACAGGGGAGACCGTGATCAAGAAGGCGGTTCCCCCAGGGCGAGGCTCACCATTGCACTCCGGTGTTGCTGACCCTTGCGATTACCCCAAATGTGGGTAACTCGGGTGCGTAATTTTTGTTAGCGGGGGACTGCGTTCGCGCTATCCCCCT
phaw_30.0007039	95326-95488	RF00003	U1	Gene	snRNA	splicing	TACTTACCTGGCACAGGGGAGACCGTGATCATGAAGGCGGTTCCCCCAGGGCGAGGCTCACCATTGCACTCCGGTGTTGCTGACCCTTGCGATTACCCCAAATGTGGGTAACTCGGGTGCGTAATTTTTGGTAGCGGGGGACTGCGTTCGCGCTATCCCCTT
phaw_30.0007039	112002-112164	RF00003	U1	Gene	snRNA	splicing	TACTTACCTGGCACAGGGGAGACCGTGATCATGAAGGCGGTTCCCCCAGCCGCTCCGAGTGGTAACGTGAGGCCACAACGACTGGGAACGCTAATGGGGTTTACACCCATTGAGCGGTGCGTAATTTTTGGTAGCGGGGGACTGCGTTCGCGCTATCCCCCT
phaw_30.0007039	112976-113132	RF00003	U1	Gene	snRNA	splicing	TGCTTGGATCACACCGAGGACTACGTGCCGTGATCAAGAAGGCCGCCTTCCTCCAGGGTGTTGCTCACCATTCGCAATTGTAAGGTGTTGCAGCACCCTGGGCTAACGCCGGTGTGTAGTTTTTGTTAGCCGGGGGAGTGTTTTAACGCTCTCCTC
phaw_30.0007039	121362-121524	RF00003	U1	Gene	snRNA	splicing	TACTTACCTGGCACAGGGGAGACCGTGATCATGAAGGCGGTTCCCCCAGGGCGAGGCTCACCATTGCACTCCGGTGTTGCTGACCCTTGCGATTACCCCAAATGTGGGTAACTCGGGTGCGTAATTTTTGGTAGCGGGGGACTGCGTTCGCGCTATCCCCCA
phaw_30.0007039	130829-130965	RF00003	U1	Gene	snRNA	splicing	TACTTACCTGGCACAGGGGAAACCGTGATCATGAAGGCGGTTCCCCCAGGGCGAGGCTCACCATTGCACTCCGGTGTTGCTGACCCTTGCGATTACCCCAAATGTGGGTAACTCGGGTGCGTAATTTTTGNNNNNN
phaw_30.0007039	131099-131231	RF00003	U1	Gene	snRNA	splicing	NNNNNNNNNNNNNNNNNNNNNNNNNGCTCACCATTGCACTCCGGTGTTGCTGACCCTTGCGATTACCCCAAATGTGGGTAACTCGGGTGCGTAATTTTTGGTAGCGGGGGACTGCGTTCGCGCTATCCCCCA
phaw_30.0007039	143574-143736	RF00003	U1	Gene	snRNA	splicing	TACTTACCTGGCACAGGGGAGACCGTGATCATGAAGGCGGTTCCCCCAGGGCGAGGCTCACCATTGCACTCCGGTGTTGCTGACCCTTGCGATTACCCCAAATGTGGGTAACTCGGGTGCGTAATTTTTGGTAGCGGGGGACTGCGTTCGCGCTATCCCCCT
phaw_30.0007039	153748-153910	RF00003	U1	Gene	snRNA	splicing	TACTTACCTGGCACAGGGGAGACCGTGATCATGAAGGCGGTTCCCCCAGGGCGAGGCTCACCATTGCACTCCGGTGTTGCTGACCCTTGCGATTACCCCAAATGTGGGTAACTCGGGTGCGTAATTTTTGGTAGCGGGGGACTGCGTTCGCGCTATCCCCCT
phaw_30.0007039	155302-155464	RF00003	U1	Gene	snRNA	splicing	TACCTACCATGTACAGGGGATACCATGATCAAGAAGGCGGTTCCCCCAAGGCTAAGCTCACCATTGCACTCCGGTGTGGCTGACCCTTGCGATTACCCCAAATGTGGGTAACTCGGGTGCGTAATTTTTGGTAGCGGGGGACTGCGTTCGCGCTATCCCCCT
phaw_30.0007591	54935-55087	RF00003	U1	Gene	snRNA	splicing	TACTTATCTTGCACAGGGTGACCGTGATCACGAAGGCGGTTCCCCCAGGGCGAGGCTCGCTCCGGTGATGCTGACCCCTGCGGTTGCCCCAAATTGGGTAACTCGGGTGTGCACTTTTTGGTAGCGGGGGACGGCGTATGTGCCATCCCCTT
phaw_30.0007591	61051-61197	RF00003	U1	Gene	snRNA	splicing	TACTTATCGCACAGGGTGACCGTGATCATGAAGGCGGTTCCCCCAGGGCGAGGCTCACCCCGGTGTTGCTGACCCCTGCGAGTACCCCAAATTGGGTGTTCGGGTGTTAAGTTTTTGTTAGCGGGGACTGCAAAGAGCTGTCCCCT
phaw_30.0025586	29542-29694	RF00003	U1	Gene	snRNA	splicing	AGGGGACAGCGCGTCCACAGTCCCCCGCTAACAAAAACTTCGCACCCGGAGCTACCCAATTTGGGGCAGCCGCAGAGTTCAGCAACACCGGAGTGAGCCTCACCCTGGGGGAACCGTCTTCATGATCACGGTCACCCTGTGCAGTTAAGTAT
phaw_30.0058488	9697-9809	RF00003	U1	Gene	snRNA	splicing	GGGGGATAGCGCGAACGCAGTCCCCCGCTACCAAAAATTACGCACCCGAGTTACCCACATTTGGGGTAATCGCAAGGGTCAGCAACACCGGAGTGCAATGGTGAGCCTCGCC
phaw_30.0072518	1170-1271	RF00003	U1	Gene	snRNA	splicing	TACTTACCTGGCACAGGGGAGACCGTGATCAAGAAGGCGGTTCCCCCAGGGCGAGGCTCACCATTGCACTCCGGTGTTGCTGACCCTTGCGATTNNNNNNN
phaw_30.0096703	1575-1688	RF00003	U1	Gene	snRNA	splicing	GGGGGATAGCGCGAACGCAGTCCCCCGCTACCAAAAATTACGCACCCGAGTTACCCACATTTGGGGTAATCGCAAGGGTCAGCAACACCGGAGTGCAATGGTGAGCCTCGCCC
phaw_30.0108716	107-266	RF00003	U1	Gene	snRNA	splicing	TACTGTGGCACAGGGGAGACCGTGATCATGAAGGCGGTTCCCCCAGGGCGAGGCTCACCATTGCACTCCGGTGTAGCTGACCCTTGCGATTACCCCAAATGTGGGTAACTCGGGTGCGTAATTTTTGGTAGCGGGGGACTGCGTTCGCGCTATCCCCCT
phaw_30.0162279	683-791	RF00003	U1	Gene	snRNA	splicing	GGGGGATAGCGCGAACGCAGTCCCCCGCTACCAAAAATTACGCACCCGAGTTACCCACATTTGGGGTAATCGCAAGGGTCAGCAACACCGGAGTGCAATGGTGAGCCT
phaw_30.0372817	33-174	RF00003	U1	Gene	snRNA	splicing	TAGGCCTCTAAACCACGCCCATCAGCCAAATGTTGCGCTAATTTACCCCTTAGAAGTTTCCCTACTTCCTTTACTGTACTGTGGCCTCGCCCTGGGGGAACCGCCTTTATGATCACGGTCTCCCCTGTGCCAGGTAAGTAT
phaw_30.0006050	33961-34089	RF00548	U11	Gene	snRNA	splicing	AAGGTGTCCAGGACAATCGTCTACCGAACTTCCTTCTATTCTAAAGATTGCATGCTGGGTATGTCTTGATGGCCATACCCCACAGGAACGAGCCCTGTGTCCCATGTAGTACGGGAAACACCCTTTAT
phaw_30.0002718	160886-161032	RF00007	U12	Gene	snRNA	splicing	GGGCAGATTGCTCACTCCTAGCCCGCCAGCAAAGTAGGCTGGCAGGCCTGGGACAACCTGGACCCTTACAAACATTCCAACTGATGTTGTCATCAGCTGAGCGAAGCGTTACCAACGCTCGGTAATTTTCCTTACTCATTAGNNNN
phaw_30.0002718	161182-161284	RF00007	U12	Gene	snRNA	splicing	GGACAACCTGGACCCTTACAAACATTCCAACTGATGTTGTCATCAGCTGAGCGAAGCGTTACCAACGCTCGGTAATTTTCCTTACTCATTAGTTTGAGGCAC
phaw_30.0002559	5212-5308	RF00004	U2	Gene	snRNA	splicing	GACCGATCCCGGAGGTAGTGCAATACCGGGCCGATCCGCGGCAAAGGTGGAGCAAGCTCCTAGCACTTCGCCATGATCCAAAAATCAGATTAATAT
phaw_30.0002559	5522-5621	RF00004	U2	Gene	snRNA	splicing	NNNNNNNNNNNNNNNNNCCCACATGGGGATCGTATCAGATATTAAGCTGATAAGAACAGATACTACACTTTGATCTTAGCCAAAAGGCCGAGAAGCGAT
phaw_30.0002559	49804-49996	RF00004	U2	Gene	snRNA	splicing	TTTCGTGGACCGATCCCGGAGGTAGTGCAATACCGGGCCGATCCGCGGCAAAGGTGGAGCAAGCTCCTAGCACTTCGCCATGATCCAAAAATCAGATTAATATCGTTGATCCCACATGGGGATCGTATCAGATATTAAGCTGATAAGAACAGATACTACACTTTGATCTTAGCCAAAAGGCCGAGAAGCGAT
phaw_30.0002702	6350-6555	RF00004	U2	Gene	snRNA	splicing	TTTCGTGGACCGATCCCGGAGGTAGTGCAATACCGGGCCGATCCGCGGCAAAGGTGGAGCAAGCTCCTAGCACTTCGCCATGNNNNNNNNNNNNNNNNNNNNNATCAGATTAATATCGTTGATCCCACATGGGGATCGTATCAGATATTAAGCTGATAAGAACAGATACTACACTTTGATCTTAGCCAAAAGGCCGAGAAGCGAT
phaw_30.0002702	12725-12917	RF00004	U2	Gene	snRNA	splicing	TTTCGTGGACCGATCCCGGAGGTAGTGCAATACCGGGTCGATCCGCGGCAAAGGTGGAGCAAGCTTCTCGCTCTTCGCCATGATCCAAAATTCAGATTAATATCGTTGATCCCACATGGGGATCATATCAGATTTTAAGCTGATAAGAACAGATACTACACTTTGATCTTAGCCAAAAGGCCGAGAAGCGAT
phaw_30.0004230	19628-19821	RF00004	U2	Gene	snRNA	splicing	TTTCGTGGACCGATCCCGGAGGCAGTGCAATACCGGGCCGATCCGTGGCAAAGGTGGAGCAAGCTCCTAGCACTTCGCCATGCTCTAAAAATCAGATTAAATATCGCTCATCCCACGTGGGGGTTGGATCAGATATTAAACTGACAAGAACAGGGACGATAGTTTGATCTTGGCCACAAGGCCGAGAAGCGAT
phaw_30.0006287	22647-22839	RF00004	U2	Gene	snRNA	splicing	TTTCGTGGACCGATCCCGGAGGTAGTGCAATACCGGGCCGATCCGCGGCAAAGGTGGAGCAAGCTCCTAGCACTTCGGGTACTAGGTTTTTAGTCTAATTATAGCAACTAGGGTCATGGGGATCGTATCAGATATTAAGCTGATAAGAACAGATACTACACTTTGATCTTAGCCAAAAGGCCGAGAAGCGAT
phaw_30.0007333	56455-56551	RF00004	U2	Gene	snRNA	splicing	TATTAATCTGAGTTTTGGATCATGGCGAAGTGCTAGGAGCTTGCTCCACCTTTGCCGCGGATCGGCCCGGTAATGCACTACCTCCGGGATCGGTCC
phaw_30.0007333	93249-93343	RF00004	U2	Gene	snRNA	splicing	TTAATCTGATTTTTGGATCATGGCGAAGTGCTAGGAGCTTGCTCCACCTTTGCCACGGATCGGCCCGGTATTGCACTACCTCCGGGATCGGTCC
phaw_30.0007333	98471-98663	RF00004	U2	Gene	snRNA	splicing	TCGCTTCTCGGCCTTTTGGCTAAGATCAAAGTGTAGTATCTGTTCTTATCAGCTTAATATCTGATACGATTCCCATGTGGGATCTACGATATTAATCTGATTTTTGGATCATAGCGAAGTGCTAGGAGCTTGCTCCACCTTTGCCACGGATCGGCCTGGTATTGCACTACCTCCGGGATCGGTCCACGAAAA
phaw_30.0007333	99550-99742	RF00004	U2	Gene	snRNA	splicing	TCGCTTCTCGGCCTTTTGGCTAAGATCAAAGTGTAGTATCTGTTCTTATCAGCTTAATATCTGATACGATCCCCATGCGGGATCAACGATATTAATCTGATTTTTGGATAATGGCGAAGTGCTAGGAGCTTGCTCCACCTTTGCCGCGGATCGGCCCGGTATTGCACTACCTCCGGGATCGGTCCACGAAAA
phaw_30.0007333	104204-104396	RF00004	U2	Gene	snRNA	splicing	TCGCTTCTCGGCCTTTTGGCTAAGATCAAAGTGTAGTATCTGTTCTTATCAGCTTAATATCTGATACGATCCCCATGTGGGATCAACGATATTAATCTGATTTTTGGATCATGGCGAAGTGCTAGGAGCTTGCTCCACTTTAGCCGCGGATCGGCCCGGTATTGCACTACCTCCGGGATCGGTCCACGTAAA
phaw_30.0007333	115623-115815	RF00004	U2	Gene	snRNA	splicing	TTTCGTGGACCGATCCCGGAGATAGTGCAAAACCGGGCCGATCCGCGGCAAACGTGGAGCAAGCTCCTAGCACTTCGTCATGATCCAAAAATCAGATTAATATCGTTGATCCCACATGGGGATCGTATCAGATATTTAGCTGATAAGAACAGATACTACACTTTGATCTTAGCCAAAAGGCCGAGAAGCGAT
phaw_30.0010966	32751-32857	RF00004	U2	Gene	snRNA	splicing	TCGCTTCTCGGCCTTTTGGCCAAGATCAAAGTATAGCATCTGTTGTTATCAGCGAGGCTATAAGGATACTTCGTACCTATGACATCACCCCCATTTCACACTTCAT
phaw_30.0012173	39265-39457	RF00004	U2	Gene	snRNA	splicing	TTTCGTGGACCGATCCCGGAGGTAGTGCAATACCGGGCCGATCCGCGGCAAAGGTGGAGCAAGCTCCTAGCACTTCGCCATGATCCAAAAATCAGATTAATATCNNNNNNNNNNNNNNNNNNNNNTATCAGATATTAAGCTGATAAGAACAGATACTACACTTTGATCTTAGCCAAAAGGCCGAGAAGCGAT
phaw_30.0012173	45594-45786	RF00004	U2	Gene	snRNA	splicing	TCGCTTCTCGGCCTTTTGGCTAAGATCAAAGTGTAGTATCTGTTCTTATCAGCTTAATATCTGATACGATCCCCATGTGGGTAGTTGCTATAATTAGACTAAATTGGATCATGGCGAAGTGCTAGGAGCTTGCTCCACCTTTGCCGCGGATCGGCCCGGTATTGCACTACCTCCGGGATCGGTCCACGAAAA
phaw_30.0012173	59843-59949	RF00004	U2	Gene	snRNA	splicing	TCGCTTCTCGGCCTTTTGGCTAAGATCAAAGTGTAGTATCTGTTCTTATCAGCTTAATATCTGATACGATCCCCATGTGGGATCAACGATATTAATCTGANNNNNN
phaw_30.0012173	64030-64233	RF00004	U2	Gene	snRNA	splicing	TTTCGTGGACCGATCCCGGAGGTAGTGCAATACCGGGCCGATCCGCGGCAAAGGTGGAGCAAGCTCCTAGCACTTCGCCATGATCCAAAAATCAGNNNNNNNNNNNNNNNNNNNNNTTGATCCCACATGGGGATCGTATCAGATATTAAGCTGATAAGAACAGATACTACACTTTGATCTTAGCCAAAAGGCCGAGAAGCGAT
phaw_30.0012173	70541-70733	RF00004	U2	Gene	snRNA	splicing	TTTCGTGGACCGATCCCGGAGGTAGTGCAATACCGGGCCGATCCGCGGCAAAGGTGGAGCAAGCTCCTAGCACTTCGCCATGATCCAAAAATCAGTAATTATAGCAACTAGGGACATGGGGATCGTATCAGATATTAAGCTGATAAGAACAGATACTACACTTTGATCTTAGCCAAAAGGCCGAGAAGCGAT
phaw_30.0012173	89830-90022	RF00004	U2	Gene	snRNA	splicing	TCGCTTCTCGGCCTTTTGGCTAAGATCAAAGTGTAGTATCTGTTCTTATCAGCTTAATATCTGATACGATCCCGTACACCCTAGTTGCTATAATTAGACTAAAAACCTAGTTGGCGAAGTGCTAGGAGCTTGCTCCACCTTTGCCGCGGATCGGCCCGGTATTGCACTACCTCCGGGATCGGTCCACGAAAA
phaw_30.0014691	31682-31805	RF00004	U2	Gene	snRNA	splicing	TCGCCTCTCGGCCTTTTGCATAAGATCAAAGTGTAGTATCTGTTCTTATCAGCTTGATGTCTGATATGATCCCCATGTGTGATCACCTATCATAACTTGATTTTGGGATCATAGCGAAGTGCT
phaw_30.0014691	35029-35220	RF00004	U2	Gene	snRNA	splicing	TCGCTTCTCGGCCTTTTGGCTAAGATCAAAGTGTAGTACTGTTCTTATCAGCTTAATATCTGATACGATCCCCATGTGGGATCAACGATATTAATCTGAATTTTGGATCATGGCGAAGTGCGAGAAGCTTACTCCACCTTTGCCGCGGATCGGCCGGTATTGCACTACCTCCAGGGATCGGTCCACGAAAA
phaw_30.0014691	45946-46149	RF00004	U2	Gene	snRNA	splicing	TCGCTTCTCGGCCTTTTGGCTAAGATCAAAGTGTAGTATCTGTTCTTATCAGCTTAATATCTGATACGATCCCCATGTGGGATCAACGATATTAATCTGNNNNNNNNNNNNNNNNNNNNNCATGGCGAAGTGCTAGGAGCTTGCTCCACCTTTGCCGCGGATCGGCCCGGTATTGCACTACCTCCGGGATCGGTCCACGAAAA
phaw_30.0014691	54390-54582	RF00004	U2	Gene	snRNA	splicing	TCGCTTCTCGGCCTTTTGGCTAAGATCAAAGTGTAGTATCTGTTCTTATCAGCTTAATATCTGATACGATCCCCATGTGGGGTCAACGATATTAATCTGATTTTTGGATCATGGCGAAGTGCTAGGAGCTTGCTCCACCTTTGCCGCGGATCGGCCCGGTATTGCACTACCTCCGGGATCGGTCCACGAAAN
phaw_30.0014691	68325-68421	RF00004	U2	Gene	snRNA	splicing	TATTAATCTGATTTTTGGATCATGGCGAAGTGCTAGGAGCTTGCTCCACCTTTGCCGCGGATCGGCCCGGTATTGCACTACCTCCGGGATCGGTCC
phaw_30.0024000	48957-49149	RF00004	U2	Gene	snRNA	splicing	TTTCGTGGACCGATCCCGGAGGTAGTGCAATACCGGGCCGATCCGCGGCAAAAGTGGAGCAAGCTCCTAGCACTTCGCCATGATCCAAAAATCAGATTAATATCATTGATCCCACATGGGGATCGTATCAGATATTAAGCTGATAAGAACAGATACTACACTTTGATCTTAGCCAAAAGGCCGAGAAGCGAT
phaw_30.0028155	180-374	RF00004	U2	Gene	snRNA	splicing	TTTCGTGGACCGATCTCGGAGGTAGTGCAATACCGTGCCGATCCGCGGCAAAGATGGAGCAAGCTCGTATAGCACTTCGCCATCATCCAAATATCAGATTTATATCATTGATCCCACATGGGGATCGTATCAGATAATAAGCTGATAAAATCAGATACTACACTTTAATCTTAGCCAAAAGGCTGAGAAGCGAT
phaw_30.0028906	21472-21657	RF00004	U2	Gene	snRNA	splicing	TTTCGTGGACCGATCCCGGAGGTAGTGCAATACCGGGCCGATCCGCGGCAAAGGTGGAGCAAGCTCCTAGCACTTCGCCATGATNNNNNNNNNNNNNNNNNNNNNCACATGGGGATCGTATCAGATATTAAGCTGATAAGAACAGATACTACACTTTGATCTTAGCCAAAAGGCCGAGAAGCGAT
phaw_30.0038716	2128-2320	RF00004	U2	Gene	snRNA	splicing	TCGCTTCTCGGCCTTTTGGCTAAGATCAAAGTGTAGTATCTGTTCTTATCAGCTTAATATCTGATACGATCCCCATGTGGGATCTATGATATTAATCTGATTTTTGGATCATGGCGAAGTACTAGGAGCTTGCTCCACCTTTGCCACGGATCGGCCCGGTATTGCACTACCTCCGGGATCGGTCCACGAAAA
phaw_30.0038716	12060-12252	RF00004	U2	Gene	snRNA	splicing	TCGCTTCTCGGCCTTTTGGCTAAGATCAAAGTGTAGTATCTGTTCTTATCAGCTTAATATCTGATACGATCCCCATGTGGGATCAACGATATTAATCTGATTTTTGGTTCCAGGCGAAGTGGTAGGAGCTTGCTCCACCTTTGCCGCGGATCGGCCCGGTATTGCACTACCTCCGGGATCGGTCCACGAAAA
phaw_30.0038716	17189-17285	RF00004	U2	Gene	snRNA	splicing	TATTAATCTGATTTTTGGATCATGGCGAAGTGCTAGGAGCTTGCTCCACCTTTGCCGCGGATCGGCCCGGTATTGCACTACCTCCGGGATCGGTCC
phaw_30.0038866	4923-5051	RF00004	U2	Gene	snRNA	splicing	TACGATCCCCATGTGGGATCAACGATATTAATCTGATTTTTGGATCATGGCGAAGTGCTAGGAGCTTGCTCCACCTTTGCCGCGGATCGGCCCGGTATTGCACTTCCTCCCGGATCGGTCCACGAAAA
phaw_30.0038866	18159-18351	RF00004	U2	Gene	snRNA	splicing	TTTCGTGGACCGATCCCGGAGGTAGTGCAATACCGGGCCGATCCGCGGCAAAGGTGGAGCAAGCTCCTAGCACTTCGCCATGATCCAAAAATCAGATTAATATCGTTGATCCCACATGGGGATCGTATCAGATATTAAGCTGATAAGAACAGATACTACACTTTGATCTTAGCCAAAAGGCCGAGAAGCGAT
phaw_30.0046246	14592-14711	RF00004	U2	Gene	snRNA	splicing	TCGCTTCTCGGCCTTTTGGCTAAGATCAAAGTGTAGTATCTGTTCTTATCAGCTTAATATCTGATACGATCCCCATGTGGGATCAACGATATTAATCTGATTTTTNNNNNNNNNNNNNN
phaw_30.0081298	13762-13956	RF00004	U2	Gene	snRNA	splicing	TTTCGTGGACCGATCCCGGAGGTAGCGCAATACCGGGCCGATCCGCGGCAAAGGTGGAGCAAGCTCGTATGGCACTTCGCCATGATCCAAATATCAAATTTATATCATTGATCCCACATGGGGATCGTATCAGATATTAAGCTGATAAGAACAGATACTACACTTTAATCTTAGCCAAAAGGCTGAGAAGCGAT
phaw_30.0120531	542-699	RF00004	U2	Gene	snRNA	splicing	TCGCTTCTCGGCCTTTTGGCTAAGATCAAAGTGTAGTATCTGTTCTTATCAGCTTAATATCTGATACGATCCCCATGTGGGATCAACGATATTAATCTGATNNNNNNNNNNNNNNNNNNCCCGGTATTGCACTACCTCCGGGATCGGTCCACGAAAA
phaw_30.0134324	516-639	RF00004	U2	Gene	snRNA	splicing	TCGCCTCTCGGCTTTTTGCATAAGATTAAAGTGTAGTATCTGTTCTTATCAGCTTGATGTCTGATATGATCCCCATGTGGGATCACCTATAATAACTTGATTTTGGGATCATAGCGAAGTGCT
phaw_30.0153027	160-312	RF00004	U2	Gene	snRNA	splicing	TTTCGTGGACCGATCCCGGAGGTAGTGCAATACCGGGCCGATCCGCGGCAAAGGTGGAGCAAGCTCCTAGCACTTCNNNNNNNNNNNNNNNNNNNNNAGCTGATAAGAACAGATACTACACTTTGATCTTAGCCAAAAGGCCGAGAAGCGAT
phaw_30.0202023	118-216	RF00004	U2	Gene	snRNA	splicing	TCGCTTCTCGGCCTTTTGGCCAAGATCAAACTATCGTCCCTGTTCTTGTCAGTTTAATTTCTGATACAACAACGACAGCCGCCATTAGGGCAGCCTTT
phaw_30.0260194	1-114	RF00004	U2	Gene	snRNA	splicing	ATGATCCAAAAATCAGATTAATATCGTTGATCCCACATGGGGATCGTATCAGATATTAAGCTGATAAGAACAGATACTACACTTTGATCTTAGCCAAAAGGCCGAGAAGCGAT
phaw_30.0262137	319-431	RF00004	U2	Gene	snRNA	splicing	TTTCGTGGACCGATCCCGGAGGTAGTGCAATACCGGGCCGATCCGCGGCAAAGGTGGAGCAAGCTCCTAGCACTTCGCCATGATCCAAAAATCAGATTAATATCGTTGATCC
phaw_30.0001167	7606-7712	RF00012	U3	Gene	snRNA	snoRNA	CD-box	CCGCTCACGACTGCCCGCTGAACTCGTCATCGTGGCGTAGGGTTAGAGTCTTAGCTCTAGGTTAATGACAACATACTATAGAAATGATCCTTTGAAGTATGGTCAT
phaw_30.0001167	23905-24096	RF00012	U3	Gene	snRNA	snoRNA	CD-box	CCACTCGGCCGGCGAACAGCCACTCCTCGCCACCAGAGCGGGGAACGGTCATCAGATTCAGAGTATAAACTCTGTGAACAGTTTCCCGCTCACGACTGCCCGCTGAACTCGTCATCGTGGTGTAGGGTTAGAGTCTTTCGAGATCCAATTACTGTTGTATGATATCTTTACTAGGAAGCTTGTATGGTCAT
phaw_30.0003986	81073-81187	RF00012	U3	Gene	snRNA	snoRNA	CD-box	TGACCATACTTGAAAGGATCATTTCTATAGTATGTTGTCATAAACCTAAGAGCTAATACTCTTACCCTACCCCACGATGACGAGTTCAGAAAACAATATATTTTAATAAGTTGT
phaw_30.0005294	189500-189703	RF00012	U3	Gene	snRNA	snoRNA	CD-box	TGATCGTACTTTAGAGGGTCAGTCCTATTGTATGTGGTCATTAACGTGCGTAGAGCTTCGACTCAAACCGTACACCACGATGACGAGTTCAGCTGACAGTCATGAGCGGGAAACTGCTTACCGAGGGCATGCTAAGTGAATCTGATAACCATTCATCGTTTTCGATTACGAGGCGGGGAGAGACTGTTCGCCGGCAGAGTAGT
phaw_30.0005549	8970-9059	RF00012	U3	Gene	snRNA	snoRNA	CD-box	AGACCATACTTCAAAGGATCATTTCTATAGTATGTTGTCATTAACCTAGAGCTACGACTCTAACGGTACCTTATGAGAAAAATAAATGA
phaw_30.0006033	85767-85902	RF00012	U3	Gene	snRNA	snoRNA	CD-box	GGACCATACTTCAAAGGATCATTTCTATAGTATGTTGTCATTAACGTAGAGCTAAGACTCTAAGACGTGCGGTGGAGAACCAGGAGCGCTAATCCAGGGTCCTTTGGGACTGAGCGGATGCCTACTAGTACTGGT
phaw_30.0006218	114289-114491	RF00012	U3	Gene	snRNA	snoRNA	CD-box	CTACTCTGCCGGCGAACAGTCTCTCCCCGCCTCGTAATCGAAAACGATGAATGGTTATCAGATTCATTTAGCATGCCCTCGCTAAACAGTTTCCCGCTCATGACTGTCAGCTGAACTCGTCATCGTGGTGTACGGTTAGAGTTGAAGCTCTAGTACGTTAATGACAACATACAATAGAACTGACCCTTTGAAGTACGGTCAT
phaw_30.0011915	34010-34195	RF00012	U3	Gene	snRNA	snoRNA	CD-box	TAACTACTATACTAAGTGAACTGTGGTTAATACTGTGAAGCCTAACTCACGATGACGAGTTCAGCGGACATTCTGAGCGGGAAACTGCTTACGGAGAGCTGTCTCGCCTAGAGTCACTTCGTCAGTCTATGACTGTCTCTGTTCTATACAGTAGAAGGTGAAGAGCTGTTCGCAGGCTGAGTGTG
phaw_30.0011975	26832-26955	RF00012	U3	Gene	snRNA	snoRNA	CD-box	TGGCCATACTTCAAAGGATCATTTCTATAGTATGTTGTCATTAACCTAGAGCTAATACTCTGGTTACCTGCATGGAAGAATGGAGAAATAGACCATCAAGTGAATGTGAAAAGTTAATTTCCA
phaw_30.0012731	43439-43638	RF00012	U3	Gene	snRNA	snoRNA	CD-box	CCACTCGGCCGGCGAACAGCCACTCCTCGCCTCGTCACCAAGAGCGGGGAACGGTCATCAGATTCACAGAGCATACACTCAGTGAACAGTTTCCCGCTCACGACTGCCCGCTGAACTCGTCATCGACCTCATCCCAATCTCAGCATCGAGATCCAATTAGACAACATACTATAGAAATGATCCTTTGAAGTATGGTCAT
phaw_30.0024905	9952-10036	RF00012	U3	Gene	snRNA	snoRNA	CD-box	CTATTAGATCTTGGCACATTCATTAATCTGCGGAATATGTTAATGACAACATACTATAGAAATGATCCTTTGAAGTATGGTCAT
phaw_30.0028808	641-828	RF00012	U3	Gene	snRNA	snoRNA	CD-box	ACACTAGGCCTGCGAACAGCTCTTCCCCTTCTACTGTACTGTAGAACAGGGACGGTCATAGACCCACGGAGTGACTCTAGGCGAGACAGCTCTCCGTAAGCAGTTTCCCGCTCAGAATGTCCGCTGAACTCGTCATCGTGAGTTAGGCTTCACAGTATTAACCACAGTTCACTTACTATAGTAGTTA
phaw_30.0051678	1-117	RF00012	U3	Gene	snRNA	snoRNA	CD-box	AGCAGTTTCCCGCTCAAGACTGTCCGCTGAACTCGTCATCGTGGGGTAGGGTAAGAGTATTAGCTCTTAGGTTTATGACAACATACTATAGAAATGATCCTTTGAAGTATGGTCAT
phaw_30.0063717	21394-21500	RF00012	U3	Gene	snRNA	snoRNA	CD-box	CCGCTCACGACTGCCCGCTGAACTCGTCATCGTGGTGTAGGGTTAGAGTCTTAGCTCTAGGTTAATGACAACATACTATAGAAATGATCCATTGAAGTATGGTCAT
phaw_30.0082779	15342	RF00012	U3	Gene	snRNA	snoRNA	CD-box	TGACAACATACTATAGAAATGATCCTTTGAAGTATGGTCAT
phaw_30.0101026	1372-1456	RF00012	U3	Gene	snRNA	snoRNA	CD-box	GCATTCATACTTCAAAGGATCATTTCTATAGTATGTTGTCATTAACCTAGAGCTAAGACTCTAACGGCTGACAATCAATTTGGT
phaw_30.0142691	470-596	RF00012	U3	Gene	snRNA	snoRNA	CD-box	CACGATGACGAGTTCAGCGGGCAGTCGTGAGCGGGAAACTGTTCACTGAGTGTATGCTCTGTGAATCTGATGACCGTTCCCCGCTTCGTTGACGAGGCGAGGAGTGGCTGTTCGCCGGCCGAGTGG
phaw_30.0205713	104-288	RF00012	U3	Gene	snRNA	snoRNA	CD-box	GCTGCACACTCCAAGTATGTTGTCATAAACCTAAGAGCTAATACTCGTACCCTACCCCACGATGACGAGTTCAGCGGACAGTCTTGAGCGGGAAACTGCTTACAGAGCGGTTGCTTTGTGAGTCTGATGACCGTCTCTGTTCTCAGTAATGAGACAGGGAGGGGCTGTTCGCCGGCCGAGTGGT
phaw_30.0296103	1-117	RF00012	U3	Gene	snRNA	snoRNA	CD-box	AGCAGTTTCCCGCTCAAGACTGTCCGCTGAACTCGTCATCGTGGGGTAGGGTAAGAGTATTAGCTCTTAGGTTTATGACAACATACTATAGAAATGATCCTTTGAAGTATGGTCAT
phaw_30.0337443	1-188	RF00012	U3	Gene	snRNA	snoRNA	CD-box	AAAGGATCATTTCTATAGTATGTTGTCATTAACCTAGAGCTACGACTCTAACCCTACTCCACGATGACGAGTTCAGCGGGCAGTCGTGAGCGGGAAACTGTTCACTGAGTGTATGCTCGGTGAATCTGATGACCGTTCCCCGCTCTCGGTGACGAGGCGAGGAGTGGCTGTTCGCCGGCTGAGTGGT
phaw_30.0338988	1-178	RF00012	U3	Gene	snRNA	snoRNA	CD-box	AGGATCATTTCTATAGTATGTTGTCATTAACCTAGAGCTAAGACTCTAACCCTACACCACGATGACGAGTTCAGCGGGCAGTCGTGAGCGGGAAGCTGTTCACTGAGTTTATACTCTGAATCTGATGACCGTTCCCCGCTCTCGAGGCGGGGAGTGGCTGTTCGCCGGCCGAGTGGT
phaw_30.0369119	1-100	RF00012	U3	Gene	snRNA	snoRNA	CD-box	CGACTGCCCGCTGAACTCGTCATCGTGGTGTAGGGTTAGAGTCTTAGCTCTAGGTTAATGACAACATACTATAGAAATGATCCTTTGAAGTATGGTCAT
phaw_30.0009078	21440-21581	RF00015	U4	Gene	snRNA	splicing	CCTGAAGCGGGCTTTCACAAATTGCCGTAGCCGACGGTATTTCACGTCGTCATGGCGGGGTATTGGTTAAAGTTTTCAACTAGCAATAATCGCACCTCGGACGAATCCTCATTGGTTACGATATTGCCTCTGCGCAAAGCT
phaw_30.0009078	26378-26519	RF00015	U4	Gene	snRNA	splicing	CCTGAAGCGGGCTTTCACAAATTGCCGTAGCCGACGGTATTTCACGTCGTCATGGCGGGGTATTGGTTAAAGTTTTCAACTAGCAATAATCGCACCTCGGACGAATCCTCATTGGTTACGATATTGCCTCTGCGCAAAGCT
phaw_30.0009078	33126-33267	RF00015	U4	Gene	snRNA	splicing	CCTGAAGCGGGCTTTCACAAATTCGGCATCGGCTGCCATAAAGTGCAGCAGTACCGCCCCTATTGGTTAAAGTTTTCAACTAGCAATAATCGCACCTCGGACGAATCCTCATTGGTTACGATATTGCCTCTGCGCAAAGCT
phaw_30.0011883	58023-58164	RF00015	U4	Gene	snRNA	splicing	TCTTTGCGCAGAGGCAATATCGTAACCAATGAGGATTCGTCCGAGGTGCGATTATTCCTAGTTGAAAACTATAACCAACACCCTGCTATGACGACGTGAAATACCGTCGGCTACGGCAATTTGTGAGAGCCCGTGTCAGGG
phaw_30.0018020	83856-83997	RF00015	U4	Gene	snRNA	splicing	GCTTTGCGCAGAGGCAATATCGTAACCAATGAGGATTCATCCGAGGTGCGATTATTGCTAGTTGAAAACTTTAACCAATACCCCGCCATGACGACGTGAAATACCGTCGGCTACGGCAATTTGTGAAAGCCCGCTTCAGGG
phaw_30.0018020	87370-87495	RF00015	U4	Gene	snRNA	splicing	CCTGAAACGGGCCTTCACAAATTGCCGTAGCCGACGGTATTTCACGTCGTCATGGCGGGGTATTGGTTAAAGTTTTCAACTAGCAATAATCGCACCTCGGACGAATCCTCATTGGTTACGATNNN
phaw_30.0018020	87515-87656	RF00015	U4	Gene	snRNA	splicing	CCTGAAGCGGGCTTTCACAAATTGCCGTAGCCGACGGTATTTCACGTCGTCATGGCGGGGGATTGGTTAAAGTTTTCAACTAGCAATAATCGCACCTCGGACGAATCCTCATTGGTTACGATATTGCCTCTGCGCAAAGCT
phaw_30.0021608	42283-42424	RF00015	U4	Gene	snRNA	splicing	GCTTTGCGCAGAGGCAATATCGTAACCAATGAGGATTCGTCCGAGGTGTGATTATTGCTAGTTGAAAACTTGAACCAATACCCTGCTATGACGACGTGAAATACCGTCGGCTACGGCAATTTGTGAGAGCCCGTGTCAGGG
phaw_30.0026749	22229-22383	RF00015	U4	Gene	snRNA	splicing	GCTATGCGCAGAGGCAATATCGTAACCAATCAGGATTGATAGGAGGTGCGATGATTGCTAATTGAAAAAAAAAATGGAGGAACTGTGGGAAATCTTACGACCAGTTTTTAGTAATAATATTTCAGTCCGTATTTTTTTATTTTATTTTATTCTA
phaw_30.0026749	24926-25008	RF00015	U4	Gene	snRNA	splicing	GCTATGCGCAGAGGCAATATCGTAACCAATGAGGATTGATAGGAGGTGCGATGATTGCTAGTTGAAAAAAAAAATAAATGGA
phaw_30.0040050	12212-12376	RF00015	U4	Gene	snRNA	splicing	GCTTTGCGCAGAGGCAATATCGTAACCAATGAGGATATTCGTCTGAGGTGCGATTATTGCTAGTTGAAAGTACGTCGGTGTTTTCAGTTGCGTAGGCAAGGAGATTCATGTCAACGCGACAATCACAAATATTTGTGGTTGTTGCACGGTAACTCGAACTTCGA
phaw_30.0041349	6280-6469	RF00015	U4	Gene	snRNA	splicing	CGGTATATAGCAATCTAAAGAGATCCTCAAGCCCTCATATTGGGGGAACTGTACATCCATGGAGCAGAGATAATGAGAGGAGGGTTGGAGTGGGTCTTTACAAAATTCCCTAGGGGAAGGTTTTCAACTAGCAATAACCGTACTTCGAACGAATCCTCATTGGTTCCGATATTGCCGCGGCCCAAAGCT
phaw_30.0064391	163-351	RF00015	U4	Gene	snRNA	splicing	GCTTTGGGCCGCGGCAATATCGGAACCAATGAGGATTCGTTCGAAGTGCGGTTATTGCTAGTTGAAAACCTTCCCCTAGGGAATTTTGTAAAGACCCACTCCAACCCTCCTCTCATTATCTCTGCTCCATGGATGTACAGTTCCCCAATATGAGGGCTTGAGGATCTCTTTAGATTGCTATATACCGT
phaw_30.0369179	1-118	RF00015	U4	Gene	snRNA	splicing	CCGTAGCCGACGGTATTTCACGTCGTCATGGCGGGGTATTGGTTAAAGTTTTCAACTAGCAATAATCGCACCTCGGACGAATCCTCATTGGTTACGATATTGCCTCTGCGCAAAGCT
phaw_30.0007039	109703-109812	RF00618	U4atac	Gene	snRNA	splicing	CTTCCAGAAATTGCAACCGTAGTTGCGATATTATTGATATCTTTGTGTTAGCACGACAGAGGCTCTCATACGATCATTGACTCTGCGTCTCACCCAAGACAAGGACGGT
phaw_30.0002559	10363-10478	RF00020	U5	Gene	snRNA	splicing	NNNNNNNNNTTCCCTTCAGAACGCATAAATCTTTCGCCTTTTACTAAAGATTTCCGTGGAGGGGAGCAACTCAATGAGTCTTAATAAATTTGTTTGAGGCTTGCTTTTGCAGGCC
phaw_30.0002559	33895-34010	RF00020	U5	Gene	snRNA	splicing	GCCTGCTGAAGCAAGCCTCAAACAAATTTATTAAGACTCATTGAGTTGCTCCCCTCCACGGAAATCTTTAGTAAAAGGCGAAAGATTTATGCGTTCTGAAGGGAAGCCAGAGCAA
phaw_30.0002702	7263-7379	RF00020	U5	Gene	snRNA	splicing	TGCTCTGGCTTCCCTTCAGAACGCATAAATCTTTCGCCTTTTACTAAAGAATTCCGTGGAGGGGAGCAACCCAATGAGTCTTAATTGATTTCTTTGAGGCTTGTCTTAGCAAGCCG
phaw_30.0002732	67455-67564	RF00020	U5	Gene	snRNA	splicing	AATGTAGCTTCCCTTCAGAACGCATAAATCTTTCGCCTTTTACGAAAGAATTCCGTGGAGGGGAGCAACTCAATAAAAAAAAAAGCTACATGGACTGCTGATAGACCAT
phaw_30.0004665	52845-52957	RF00020	U5	Gene	snRNA	splicing	CCGGCCCTCTATGAGCTATTTCCATAAAAAAAGACTCATTGAGTTGCTCCCCTCCACGGAAATCTTTAGTAAAAGGCGAAAGATTTATGCGTTTTGAAGGAAGCCGTGAAGA
phaw_30.0006287	5525-5641	RF00020	U5	Gene	snRNA	splicing	GGCCTGCTGAAGCAAGCCTCAAACAAATTTATTAAGACTCATTGAGTTGCTCCCCTCCACGGAAATCTTTAGTAAAAGGCGAAAGATTTATGCGTTNNNNNNNNNNNNNNNNNNNN
phaw_30.0007333	51557-51673	RF00020	U5	Gene	snRNA	splicing	GGCTTGCTAAGAGAAGCCTCAAAGAAATTTATGAAGACTCATTGAGTTGCTCCCCTCCACGGAAATCTTTAGTAAAAGGCGAAAGATTTATGCGTTCTGAAGGGAAGCCAGAGCAA
phaw_30.0007333	89237-89345	RF00020	U5	Gene	snRNA	splicing	CTTGTCAGACAAACCTCAAGCAGATATTGAAGACTCATAGAGTTGCTCTTCCACGGAAATCTTAAGTAAAGGGCGAAAGATTTATGCGTTCTGAAGGGAAGCCAGCTA
phaw_30.0007333	96232-96347	RF00020	U5	Gene	snRNA	splicing	GCCTGCTAAAGCAAGCCTCAAACAAATTTTTAAAGACTCATTGAGTTGCTCCCCTCCACGGAAATCTTTAGTAAAAGGCGAAAGATTTATGCGTTCTGAAGGGAAGCCAGAGCAA
phaw_30.0007333	119425-119540	RF00020	U5	Gene	snRNA	splicing	TGCTCTGGCTTCCCTTCAGAACGCATAAATCTTTCGCCTTTTACTAAAGATTTCCGTGGAGGGGAGCAACTCAATGAGTCTTTAAAAATTTGTTTGAGGCTTGCTTTAGCAGGCC
phaw_30.0012173	40778-40893	RF00020	U5	Gene	snRNA	splicing	CGCTCTGGCTTCCCTTCAGAACGCATAAATCTTTCGCCTTTTACTAAAGATTTCCGTGGAGGGGAGCAACTCAATGAGTCTTAATAAATTTGTTTGAGGCTTGCTTTTGCAGGCC
phaw_30.0012173	43998-44113	RF00020	U5	Gene	snRNA	splicing	GCCCGCAAAAGCAAGCCTCAAACAAATTTTTAAAGACTCATTGAGTTGCTCCCCTCCACGGAAATCTTTAGTAAAAGGCGAAAGATTTATGCGTTCTGAAGGGAAGCCAGAGCNN
phaw_30.0012173	56474-56589	RF00020	U5	Gene	snRNA	splicing	CGCTCTGGCTTCCCTTCAGAACGCATAAATCTTTCGCCTTTTACTAAAGATTTCCGTGGAGGGGAGCAACTCAATGAGTCTTTAAAAATTTGTTTGAGGCTTGCTTATGCAGGCC
phaw_30.0012173	66039-66154	RF00020	U5	Gene	snRNA	splicing	TGCTCTGGCTTCCCTTCAGAACGCATAAATCTTTCGCCTTTTACTAAAGATTTCCGTGGAGGGGAGCAACTCAATGAGTCTTTGAAAATTTGTTTGAGGCTTGCTTTTGCAGGCC
phaw_30.0014691	45426-45542	RF00020	U5	Gene	snRNA	splicing	GGCTTGCTAAGACAAGCCTCAAAGAAATCAATGAAGACTCATTGAGTTGCTCCCCTCCACGGAAATCTTTAGTAAAAGGCGAAAGATTTATGCGTTCTGAAGGGAAGCCAGAGCAA
phaw_30.0038716	28-136	RF00020	U5	Gene	snRNA	splicing	CTTGTCAGACAAACCTCAAGCAGATATTGAAGACTCATAGAGTTGCTCTTCCACGGAAATCTTCAGTATAAGGCGAAAGATTTATGCGTTCTGAAGGGAAGCCAGCTA
phaw_30.0038716	4823-4938	RF00020	U5	Gene	snRNA	splicing	GCCTGCTGAAGCAAGCCTCAAACAAATTTTCAAAGACTCATTGAGTTGCTCCCCTCCACGGAAATCTTTAGTAAAAGGCGAAAGATTTATGCGTTCTGAAGGGAAGCCAGAGCAA
phaw_30.0038716	17520-17635	RF00020	U5	Gene	snRNA	splicing	GCCTGCTAAAGCAAGCCTCAAACAAATTTTTAAAGACTCATTGAGTTGCTCCCCTCCACGGAAATCTTTAGTAAAAGGCGAAAGATTTATGCGTTCTGAAGGGAAGCCAGAGCAA
phaw_30.0042222	431-470	RF00020	U5	Gene	snRNA	splicing	GAACGCATAAATCTTTCGCCTTTTACTAAAGATTTCCGT
phaw_30.0046246	13516-13631	RF00020	U5	Gene	snRNA	splicing	GCTTGCAAAAGCAAGCCTCAAACAAATTTATTAAGACTCATTGAGTTGCTCCCCTCCACGGAAATCTTTAGTAAAAGGCGAAAGATTTATGCGTTCTGAAGGGAAGCCAGAGCGA
phaw_30.0047847	12638-12753	RF00020	U5	Gene	snRNA	splicing	GCCTGCTAAAGCAGGCCTCAAACAAATTTTTAAAGACTCATTGAGTTGCTCCCCTCCACGGAAATCTTTAGTAAAAGGCGAAAGATTTATGCGTTCTGAAGGGAAGCCAGAGCGA
phaw_30.0049349	2478-2593	RF00020	U5	Gene	snRNA	splicing	GCCTGCAAAAGCAAGCCTCAAACAAAGTTTTAAAGACTCATTGAGTTGCTCCCCGCCACGGAAATCTTTAGTAAAAGGCGAAAGATTTATGCGTTCTGAAGGAAAGCCAGAGCAG
phaw_30.0057034	2246-2362	RF00020	U5	Gene	snRNA	splicing	GGCTTACTAAGACAAGCCTCAAAGAAATTTATAAAGACTCATTGAGTTGCACCCCTCCACGGAAATCTTTAGTAAAAGGCGAAAGATTTATGCGTTCTGAAGGGAAGCCAGAGCAG
phaw_30.0081298	14356-14473	RF00020	U5	Gene	snRNA	splicing	TGCCCTGGCGTCCCCTCTGAAGGCGTACATCTTTCGCCTTTAACTAAAGAGTTCCGTGGAGGGGAGTAACTCGATGAGTCTTTATAAATTTCTTTTGAGGCTTGTTCTTGCAAGCCG
phaw_30.0086054	647-762	RF00020	U5	Gene	snRNA	splicing	TGCTCTGGCTTCCCTTCAGAACGCATAAATCTTTCGCCTTTTACTAAAGATTTCCGTGGAGGGGAGCAACTCAATGAGTCTTATTATATTTGTTTGAGGCTTGCTCTAGCAAGCC
phaw_30.0153027	724-840	RF00020	U5	Gene	snRNA	splicing	TGCTCAGGCTTCCCATCAGAACGCATAAATCTTTCGCCTTTTACTAAAGATTTCCGTGGAGGGGAGCAACTCAATGAGTCTTCATAAATTTCTTTGAGGCTTGTCTTAGCAAGCCG
phaw_30.0189434	529-644	RF00020	U5	Gene	snRNA	splicing	CGCTCAGGCTTCCCTTCAGAACGCATAAATCTTTCGCCTTTTACTAAAGATTTCCGTGGAGGGGAGCAACTCAATGAGTCTTTAAAAATTTGTTTGAGGCTTGCTTTTGCAGGCC
phaw_30.0270222	301-415	RF00020	U5	Gene	snRNA	splicing	GGCTTGCTAAGACAAGCCTCAAAGAAATTTATAAAGACTCATTGAGTTGCTCCCCTCCACGGAAATCTTTAGTAAAAGGCGAAAGATTTATGCGTTCTGAAGGGAAGCCAGAGC
phaw_30.0000455	230267-230359	RF00026	U6	Gene	snRNA	splicing	AAAATGGGGAACGCTTCACGGTTTTCTGAGTCATGCTAGCGCAGGAGTCGAGCTGATCTTTTCTGTACCAAGTTTAACACATGCACCACTGC
phaw_30.0001184	71193-71299	RF00026	U6	Gene	snRNA	splicing	TACCTGCTTCGGCGGCACATATACTAAAATTGGAACGATACAGAGAAAATTAGCATGGCACTTGCACAAGGATCACACGCGAAATCGTAAACCATCCCAAATTTTT
phaw_30.0001803	25538-25644	RF00026	U6	Gene	snRNA	splicing	TACCTGCTTCGGCGGTACATATGCTAAAATTGGAACGGTACAGAGAAAATTAGCATGGCCCCTGCGCTAGGATGGCAGGCAAAATCGTGAAGCGTTCCACATTTTT
phaw_30.0002294	70027-70133	RF00026	U6	Gene	snRNA	splicing	TACCTGCTTCGGCGGTACATATACTAAAATTGGAACGATACAGAGAAGATTAGCATGGCCCCTGCGCAAGGATGACACGCAAAATCGTGAAGCGTTCCACATTTTT
phaw_30.0002328	191530-191638	RF00026	U6	Gene	snRNA	splicing	CCTGCTTCGGCGGTAGGCTACAATCCTGAAATTGGAACGATACAGAGACGATTAGCATGGGCCCTGCGCAAGGGTGACACGCAAAATCGTGAAGCGTTCCACATTTTT
phaw_30.0002387	62115-62224	RF00026	U6	Gene	snRNA	splicing	AAAATGTAGAACGCTTCACGATTTTGCGTGTCATCCTGGCGCAGGGGCCATGCTAATCTTCTCTGTATCGTTCCAATTTTAGAATATGTACCGCCGAAGCAGGTAGTAC
phaw_30.0002387	124427-124527	RF00026	U6	Gene	snRNA	splicing	GAAATGAGATATAATTATCAGCATTAAGTAAGCAAGGGCCATGCTAATCTTCTCTGTATCGTTCCAATTTTAGAATATGTACCGCCGAAGCAGGTAGTAC
phaw_30.0002415	30865-30963	RF00026	U6	Gene	snRNA	splicing	AAAATGTGGAACGCTTCACGTGTCATCCTTGCGCAGGGGCCATGCTAATCTTCTCTGTATCGTTCCAATTTTAGTATATGTACAGCCGAAGCCTGTAT
phaw_30.0003845	97016-97122	RF00026	U6	Gene	snRNA	splicing	TACCTGCTTCGGCGGTACATATACTAAAATTGGAACGATACAGAGAAGATTAGCATGGCCCCTGCACAAGGATGACTCGCAAAATCGTGAAGCGTTCCAAATTTTT
phaw_30.0003892	254602-254706	RF00026	U6	Gene	snRNA	splicing	AAAATGAGGAGCGATTCGCGACCTTGCGTGTCATTCTTGCGTAAAGGTCATGCTAATCTTCTCTGTATCGTTCCAATTTTAGTATGATGTACCGCCGAAGCGCG
phaw_30.0003997	675611-675711	RF00026	U6	Gene	snRNA	splicing	AGAATGTGGAGTACGTTATAATTTTGCGCGTCATTCTTGCACAGGAGCTGTGATCATCTTCTGCACATCCTCCCAATATTAGTATATGTATCGAAGAAAC
phaw_30.0004200	56512-56618	RF00026	U6	Gene	snRNA	splicing	AAAATGTAGAACGCTTCACGATTTTGCGTGTCATCCTTGCGCAGGGGCCATGCTAATCTTCTCTGTATCGTTCCAATTTTAGTATATGTACCGCCGAAGCAGGTAC
phaw_30.0004200	60065-60171	RF00026	U6	Gene	snRNA	splicing	TACCTGCTTCGGCGGTACATATACTAAAATTGGAACGATACAGAGAAGATTAGCATGGCCCCTGCGCAAGGATGACACGCAAAATCGTGAAGCGTTCCACATTTTT
phaw_30.0004200	98687-98790	RF00026	U6	Gene	snRNA	splicing	NNNNNNNNNNNNNNNATATACTAAAATTGGAACGATACAGAGAAGATTAGCATGGCCCCTGCGCAAGGATGACACGCAAAATCGTGAAGCGTTCCACATTTTT
phaw_30.0004200	102859-102965	RF00026	U6	Gene	snRNA	splicing	AAAATGTGGAACGCTTCACGATTTTGCGTGTCATCCTTGCGCAGGGGCCATGCTAATCTTCTCTGTATCGTTCCAATTTTAGTATATGTACCGCCGAAGCAGGTAC
phaw_30.0005585	116670-116772	RF00026	U6	Gene	snRNA	splicing	TACTTCGGCGGTACATATACTAAAATTGGAACGATACAGAGAAGATTAGCATGGCCCCTGCGCAAGGATGACACGCAAAATCGTGAAGCGTTCCACATTTTA
phaw_30.0005724	603-703	RF00026	U6	Gene	snRNA	splicing	CATTATGTTTGATCCTCATAATTTTGCGTGCCAGCCTTGCGCAGGGGACATGCTAATCTTCTCTGTATGGTTCCAATTTTAGTATACGTGTTGTGCGCGT
phaw_30.0008089	12470-12575	RF00026	U6	Gene	snRNA	splicing	TTACTATAGTAACCATCATTATCGTATGTATCATCCTTGCGCAGGGGCCATGCTAATCTTCTCTGTATCGTTCCAATTTTAGTATATGTACCGCCGAAGCGGTAC
phaw_30.0009121	45540-45646	RF00026	U6	Gene	snRNA	splicing	TACCTGCTTCGGCGGTACATTTACTAAAATTGGAACGATACAGAGACGACTAGCATGGCCCCTGCTCAACGATGACACGCAAAATCATGAAGCGTTCCACATTTAT
phaw_30.0010412	12855-12959	RF00026	U6	Gene	snRNA	splicing	GAAATTTGGAAGGCTTTCCGATGTTGCACGTTATTCGAGTTCAGCGGCCATGCCAATCTCCTCTATTGTTTCATATTTAGTACATGTATCACCGAAGCAGGTAC
phaw_30.0010776	35166-35272	RF00026	U6	Gene	snRNA	splicing	AAAATGTGGAACGCTTCACGATTTTGCGTGTCATCCTTGCGCAGGGGCCATGCTAATCTTCTCTGTATCGTTCCAATTTTAGTATATGTACCGCCGAAGCAGGTAC
phaw_30.0010776	61826-61932	RF00026	U6	Gene	snRNA	splicing	AAAATGTGGAACGCTTCACGATTTTGCGTGTCATCCTTGCGCAGGGGCCATGCTAATCTTCTCTGTATCGTTCCAATTTTAGTATATGTACCGCCGAAGCAGGTAC
phaw_30.0010776	78239-78345	RF00026	U6	Gene	snRNA	splicing	TACCTGCTTCGGCGGTACATATACTAAAATTGGAACGATACAGAGAAGATTAGCATGGCCCCTGCGCAAGGATGACACGCAAAATCGTGAAGCGTTCCACATTTTT
phaw_30.0010776	104248-104354	RF00026	U6	Gene	snRNA	splicing	AAAATGTGGAACGCTTCACGATTTTGCGTGTCATCCTTGCGCAGGGGCCATGCTAATCTTCTCTGTATCGTTCCAATTTTAGTATATGTACCGCCGAAGCAGGTAC
phaw_30.0010776	143619-143689	RF00026	U6	Gene	snRNA	splicing	TTGCGCAGGGGCCATGCTAATCTTCTCTGTATCGTTCCAATTTTAGTATATGTACCGCCGAAGCAGGTAC
phaw_30.0010776	151003-151109	RF00026	U6	Gene	snRNA	splicing	CAAATGTGGAACGCTTCACGATTTTGCGTGTCATCCTTGCGCAGGGGCCATGCTAATCTTCTCTGTATCGTTCCAATTTTAGTATATGTACCGCCGAAGCAGGTAC
phaw_30.0011136	7142-7248	RF00026	U6	Gene	snRNA	splicing	AAAATGTGGAACGCTTCACGATTTTGCGTGTTATCCTTGCGCAGGGGCCATGCTAAACTTCTCTGTATCGTTCCAATTTTAGTATATGTACCGCCGAAGCAGGTAC
phaw_30.0011136	10135-10241	RF00026	U6	Gene	snRNA	splicing	TACCTGCTTCGGCGGTACATATACTAAAATTGGAACGATACAGAGAAGATTAGCATGGCCCCTGCGCAAGGATGACACGCAAAATCGTGAAGCGTTCCACATTTTT
phaw_30.0011136	15261-15367	RF00026	U6	Gene	snRNA	splicing	TACCTGCTTCGGCGGTACATATACTAAAATTGGAACGATACAGAGAAGATTAGCATGGCCCCTGCGCAAGGATGACACGCAAAATCGTGAAGCGTTCCACATTTTC
phaw_30.0011136	22717-22823	RF00026	U6	Gene	snRNA	splicing	TACCTGCTTCGGCGGTACATATACTAAAATTGGAACGATACAGAGAAGATTAGCATGGCCCCTGCGCAAGGATGACACGCAAAATCGTGAAGCGTTCCACATTTTT
phaw_30.0011136	47524-47630	RF00026	U6	Gene	snRNA	splicing	TACCTGCTTCGGCGGTACATATTCTAAAATTGGAACGATACAGAGAAGATTAGCATGGCCCCTGCGCAAGGATGACACGCAAAATCGTGAAGCGTTCCACATTTTT
phaw_30.0012812	95203-95310	RF00026	U6	Gene	snRNA	splicing	TACCTCTTTCGGCGGTACATATACAGTACTAAACTTGGATACAGAGAAGATTAGCATGGCCCCTGCGCAAGATTGACACGCAAAATCGTGGAGCGTTCCATATTTTT
phaw_30.0013403	57213-57319	RF00026	U6	Gene	snRNA	splicing	TACCTGCTTCGGTGGTACATATACTAAAATTGGAACGATACAGAGAACATTAGCATAGCCTCTGCGCAAGGATGACACTAAAAATCGTGAAGCATTCCACGTTTTT
phaw_30.0015151	64839-64941	RF00026	U6	Gene	snRNA	splicing	AACATGAGGCAAGCTTTACGATATTGCGTGTTATCCGTGCTCAGGGGCCATGCTAATCTTCTCTGTATCGTTCCAATTTTAGTATATGGTAAGAACATTACC
phaw_30.0016784	21501-21607	RF00026	U6	Gene	snRNA	splicing	TACCTGCTTCGGCGGTACATATACTAAAATTGGAACGATACAGAGAAGATTAGCATGGCCCCTGCGCAAGGATGACACGCAAAATCGTGAAGCGTTCCACATTTTT
phaw_30.0017069	31544-31631	RF00026	U6	Gene	snRNA	splicing	NNNNATAAAATTAGAATTATACGGAGAAGATTTGCTCGGCCCCTGCGGGAGGATCGCGCGTAAAGTCGTGAAGCGTTCCACATTTTT
phaw_30.0019740	10174-10280	RF00026	U6	Gene	snRNA	splicing	AAAATGTGGGACGCTTCACGATTTCGAGTGTCATCCTTGTGCAAGGGCCGTGCTAATTTTCTCTGTATCGTTCCAATTTTAGTATATGTGCCGCCGAAGCAGGTAC
phaw_30.0020469	42921-43025	RF00026	U6	Gene	snRNA	splicing	CAAATATGGAGCGCTTCACGATTTTGCGGGTCATCCTTGGGTGGGGCCGCATAACCTTCTTTGTATTGTTCCCATTTTAGTGCATGTTCCTCCAAAGCAGGTAC
phaw_30.0022439	18442-18554	RF00026	U6	Gene	snRNA	splicing	AAAATGTGGAACGCTTCACGATTTTGCGTGTCATCCTTGCGCAGGGGCCATGCTAATCTTCTCTGTATCGTTCCAATTTTAGTATATGTACCGCCGAAGCAGGTGGGAGCAC
phaw_30.0022578	26-135	RF00026	U6	Gene	snRNA	splicing	TACCTGCTTCGGCGGTAAGTATCCTCCAATTGGAACCCTACAGAAAGATCAGATCGGCCTTTGCGCAAGGATAACACGCAAAATCGTGAATGAAGCGCTCCACATTTTT
phaw_30.0022760	6344-6450	RF00026	U6	Gene	snRNA	splicing	TACCTGCTTCGGCGGTACATATACTAAAATTGGAACGATACAGAGAAGATTAGCATGGCCCCTGCGCAAGGATGACACGCAAAATCGTGAAGCGTTCCACATTTTT
phaw_30.0023703	6077-6177	RF00026	U6	Gene	snRNA	splicing	AAAATGTTGAACACTTCACGATTTTTCGTGTCTTCTTCACTCGGTGGCAATGCTAATCATCTTCGTTTCGTACCATGAACCAAACTCTCTTCGTAAAAGC
phaw_30.0026148	46572-46640	RF00026	U6	Gene	snRNA	splicing	TACCTGCTTCGGGGGTACATATACTAAAACTGGAACGATACAGAGAAGATTAGCATGGCCCCTGCGCA
phaw_30.0026816	18499-18602	RF00026	U6	Gene	snRNA	splicing	CCCCTTCGGCGGTACATATACTAAAATTGAAACGATACAGAGAAGATTAGCATGGCCCCTGAGCAAGGATGACACGCAAAATCGTGAAATGTTCATTTTTTTG
phaw_30.0033855	1087-1190	RF00026	U6	Gene	snRNA	splicing	AAAAATTGGAACGCTTCACGATTTTGCGTGTCATCCTTGCTCAGGGGCCATGCTAATCTTCTCTGTGTAGTCTAAGTTTTAGTATATGTACCGCCGAAGGGGC
phaw_30.0036444	15705-15815	RF00026	U6	Gene	snRNA	splicing	AAAATGTGGAGCGCTTCATTCACGATTTTGCGTGTCATCCTTGCGCAAAAGGCCGATCTGATCTTTCTGTAGGGTTCCAATTTCAGGATACGTACCGCCGAAGCAGGTAC
phaw_30.0036604	1637-1744	RF00026	U6	Gene	snRNA	splicing	TACCTGCTTCGGCGGTACATATACAGTACTAAACTTGGATACAGAGAAGATTAGCATGGCCCTTGGGCAAGCTTGACACGCAAAATCGTGGAGCGTTCCATATTTTT
phaw_30.0039079	6170-6276	RF00026	U6	Gene	snRNA	splicing	AAAATGTGGAACGCTTCACGATTTTGCGTGTCATCCTTGCGCAGGGGCCATGCTAATCTTCTCTGTATCGTTCCAATTTTAGTATATGTACCGCCGAAGCAGGTAC
phaw_30.0044954	11342-11445	RF00026	U6	Gene	snRNA	splicing	TCTGCTTCGGCCGTACAATACTAAAATTGGAACGATACAGAGACGGTTAGCATGGCTCCTGCATAAGGATGACACGCAAAATCGTGAAGCCTTCCGCATTTTT
phaw_30.0046303	5636-5734	RF00026	U6	Gene	snRNA	splicing	TACAGGCTTCGGCGGTACATATACTAAAATTGGAACGATACAGAGAAGATTAGCATGGCCCCTGCTCAAGGATGACAAGTGAAGCGTTCCGCATTTTT
phaw_30.0055399	861-965	RF00026	U6	Gene	snRNA	splicing	CAAATATGGAGCGCTTCACGATTTTGCGGGTCATCCTTGGGTGGGGCCGCATAACCTTCTTTGTATTGTTCCCATTTTAGTGCATGTTCCTCCAAGGCAGGTAC
phaw_30.0002559	35240-35342	RF00619	U6atac	Gene	snRNA	splicing	TGTTGTAAGAAAGGAGAGAAGGTTAGCACTCCCCTAGACAAGGATGGACAACACATATACCGTCATGGCACAGCCGCTTCGGCGGCAACATGACAATTTTTG
phaw_30.0006287	7554-7656	RF00619	U6atac	Gene	snRNA	splicing	TGTTGTAAGAAAGGAGAGAAGGTTAGCACTCCCCTAGACAAGGATGGACAACACATATACCGTCATGGCACAGCCGCTTCGGCGGCAACATGACAATTTTTG
phaw_30.0317978	14-116	RF00619	U6atac	Gene	snRNA	splicing	AAAAATTGTCATGTTGCCGCCGAAGCGGCTGTGCCATGACGGTATATGTGTTGTCCATCCTTGTCTAGGGGAGTGCTAACCTTCTCTCCTTTCTTACAACAC
phaw_30.0014020	43638-43683	RF00032	Histone3	Gene	Cis-reg	TAACGGCCCTTTTGAGGGCCACCAAATGCGCCAAGAAAAATTACT
phaw_30.0083793	1492-1537	RF00032	Histone3	Gene	Cis-reg	TAACGGCTCCTCTAGGAGCCACCTTTTCTTTTAGAAAGGATTTTG
phaw_30.0376855	180-225	RF00032	Histone3	Gene	Cis-reg	TAACGGCTCCTCTAGGAGCCACCTTTTCTTTTAGAAAGGATTTTG
phaw_30.0064627	8451-8497	RF00032	Histone3	Gene	Cis-reg	TAACGGCTCCTCTAGGAGCCACCTTTTCTTTTGGAAAATATTTTGT
phaw_30.0016163	2404-2449	RF00032	Histone3	Gene	Cis-reg	TAACGGTGTTTTTAAACACCATCATTAATTTTTTTATTCTGGAAG
phaw_30.0008536	65634-65680	RF00032	Histone3	Gene	Cis-reg	TAATGGTTTTTATCAAAACCACGTCATTTACAAAAGAATTACCTTT
phaw_30.0014020	39710-39755	RF00032	Histone3	Gene	Cis-reg	TACCGGCTCCTCTTGGAGCCACCACTATTCCGAAAGTGATACTTT
phaw_30.0065854	61-106	RF00032	Histone3	Gene	Cis-reg	TACTATCCTAATTTTATTAATTATGGCGTCAAATAACGCCTAAAG
phaw_30.0084096	168-254	RF00029	Intron_gpII	Gene	Intron	TAGAGTAAGAGGCAGGGCGTAGTCGGACTATTTCCCTGCCTCTCCTCCCCGAACCGGACGTGCACCTTTCAGCGCATCCGGCTCTC
phaw_30.0004062	2204-2317	RF00485	K_chan_RES	Gene	Cis-reg	TAGGTTATGGTGACGTGTACCCAGAAACCCCCCTTGGCAAGGTGATAGGTTCGGTATGCTGTATTTGTGGTGTGTTGGTCATTGCGCTGCCTATTCCTATCATCGTCAACAAC
phaw_30.0014020	45964-46009	RF00032	Histone3	Gene	Cis-reg	TAGTACATTTCATGAAGAATAGGTGGCTCCTAGAGGAGCCGTTAG
phaw_30.0059594	985-1029	RF00032	Histone3	Gene	Cis-reg	TATAGGTTCTTCTAAGAACCAACAAGATAAATATGGGAGACTGT
phaw_30.0007821	82667-82712	RF00032	Histone3	Gene	Cis-reg	TCCCGGTTTTCTTAAAAACTACTCACACAACTAAAATAAGTTTCT
phaw_30.0181590	452-497	RF00032	Histone3	Gene	Cis-reg	TCCCGGTTTTCTTAAAAACTACTCACACAACTAGAATAATTTTTT
phaw_30.0005568	8049-8094	RF00032	Histone3	Gene	Cis-reg	TGTCATTTTTAGAACACTGATGATGGATTTTAAAAAATCCGAAAC
phaw_30.0000001	365184-365254	RF00005	tRNA	Gene	tRNA	CATCGGTGGTTCAGTGGTAGAATTCTCGCCTGCCACGCGGGAGGCCCGGGTTCGATTCCCGGCCGATGCA
phaw_30.0000011	222174-222247	RF00005	tRNA	Gene	tRNA	GGCCAGTATGGGGATCGAACCCACGACATCCGCGTTATTAGCACGGCGCTCTAACCGACTGAGCTAACCGGCC
phaw_30.0000073	10952-11023	RF00005	tRNA	Gene	tRNA	TCCCATGCCGGGAATCGAACCCGGGCCTCCTGGGTGAAAGCCAGGTATCCTAGCCACTAGACCACATGGGA
phaw_30.0000134	54565-54637	RF00005	tRNA	Gene	tRNA	ACCGTGTGGCCTAATGGATAAGGCGTCGGACTTCGGATCCGAAGATTGCAGGTTCGAGTCCTGTCACGGTCG
phaw_30.0000134	54825-54906	RF00005	tRNA	Gene	tRNA	GCGAGGTGGCCGAGTGGTTAAGGCGTTGGACTGCTAATCCAATACGGTCTCCGTGCGTGGGTTCGAATCCCATCCTCGTCG
phaw_30.0000134	80160-80231	RF00005	tRNA	Gene	tRNA	GGGGGCGCCCGGGTTTGAACCGGGGACCTCTCGATCTGCAGTCGAATGCTCTACCACTGAGCTACACCCCC
phaw_30.0000187	50272-50344	RF00005	tRNA	Gene	tRNA	CCTTCATAGCTCAGGGGTTAGAGCGCTGGTCTAGTAAACCAGAGGCCGGGAGTTCGATTCTCCCTGAAGGCA
phaw_30.0000187	111798-111870	RF00005	tRNA	Gene	tRNA	CCTTCATAGCTCAGGGGTTAGAGCGCTGGTCTAGTAAACCAGAGGCCGGGAGTTCGATTCTCCCTGAAGGCA
phaw_30.0000207	78482-78553	RF00005	tRNA	Gene	tRNA	GTTCTATGGTGTAATGGTTAGCACTCTGGACTTTGAATCCAGCGATCCGAGTTCGAGTCTCGGTAGAACCT
phaw_30.0000207	79642-79713	RF00005	tRNA	Gene	tRNA	GACCCCAGAGTGACTCGAACACCCAACCTTCTGATCTGGAGTCAGACGCGCTACCATTGCGCCATAGGGCC
phaw_30.0000207	80250-80321	RF00005	tRNA	Gene	tRNA	GCCCTATGGCGCAATGGTAGCGCGTCTGACTCCAGATCAGAAGGTTGGGTGTTCGAGTCACTCTGGGGTCA
phaw_30.0000219	33907-33978	RF00005	tRNA	Gene	tRNA	TCCCATGCCGGGAATCGAACCCGGGCCTCCTGGGTGAAAGCCAGGTATCCTAGCCACTAGACCACATGGGA
phaw_30.0000219	35527-35598	RF00005	tRNA	Gene	tRNA	TCCCATGCCGGGAATCGAACCCGGGCCTCCTGGGTGAAAGCCAGGTATCCTAGCCACTAGACCACATGGGA
phaw_30.0000219	40306-40377	RF00005	tRNA	Gene	tRNA	TCCCATGCCGGGAATCGAACCCGGGCCTCCTGGGTGAAAGCCAGGTATCCTAGCCACTAGACCACATGGGA
phaw_30.0000219	51400-51471	RF00005	tRNA	Gene	tRNA	TCCCATGCCGGGAATCGAACCCGGGCCTCCTGGGTGAAAGCCAGGTATCCTAGCCACTAGACCACATGGGA
phaw_30.0000359	72420-72490	RF00005	tRNA	Gene	tRNA	CATCGGTGGTTCAGTGGTAGAATTCTCGCCTGCCACGCGGGAGGCCCGGGTTCGATTCCCGGCCGATGCA
phaw_30.0000359	85542-85613	RF00005	tRNA	Gene	tRNA	CCTCGGTAGTATAGTGGTGAGTATCCCCGCCTGTCACGCGGGAGACCGGGGTTCGATTCCCCGCCGGGGAG
phaw_30.0000361	437843-437924	RF00005	tRNA	Gene	tRNA	GACAGCGGTGGGATTCGAACCCACGCCTCCTGAGAGACTGGAGCCTAAATCCAGCGCCTTAGACCACTCGGCCACGCTGCC
phaw_30.0000379	64603-64676	RF00005	tRNA	Gene	tRNA	GCCTGTTAGCTCAGTTGGTTAGAGCGCCGTGCTAATAACGCGGATGTCGTGGGTTCGATCCCCATATGGGCCA
phaw_30.0000379	67844-67917	RF00005	tRNA	Gene	tRNA	GCCTGTTAGCTCAGTTGGTTAGAGCGCCGTGCTAATAACGCGGATGTCGTGGGTTCGATCCCCATATGGGCCA
phaw_30.0000393	24558-24623	RF00005	tRNA	Gene	tRNA	GGCCCATGGTGTAGGGGTTAGCACATTGAAATCCGAGAACCCGGGTTCGATCCCCGGTGGGCCCT
phaw_30.0000447	311279-311350	RF00005	tRNA	Gene	tRNA	GCCGTGACCAGGATTCGAACCTGGGTTATTGCGGCCACAACGCAATGTACTAACCACTATACGATCACGGC
phaw_30.0000447	357109-357180	RF00005	tRNA	Gene	tRNA	GCCGTGACCAGGATTCGAACCTGGGTTATTGCGGCCACAACGCAATGTACTAACCACTATACGATCACGGC
phaw_30.0000494	31046-31118	RF00005	tRNA	Gene	tRNA	CGTAAACGGCTCAGTCGGTAGAGCACGAGACGCTTAATCTCTGGGTCGTGGGTTCGAGCCCCACTCTGTGCG
phaw_30.0000573	10790-10862	RF00005	tRNA	Gene	tRNA	TGCTTATGGTGTAGTGGTTATCACGTCTGTCTTACACACAGAAGGTCCCTGGTTCGAGCCCAGGTAAGCACA
phaw_30.0000573	121196-121268	RF00005	tRNA	Gene	tRNA	TGCTTATGGTGTAGCGGTTATCACGTCTGTCTTACACACAGAAGGTCCCTGGTTCGAGCCCAGGTAAGCACA
phaw_30.0000696	133424-133505	RF00005	tRNA	Gene	tRNA	GCTGTAGACAGGATTCGAACCTGTGCGGGCAGAGCCCAATGGATTTCTAGTCCATCTCCTTAACCACTCGGACACCACAGC
phaw_30.0000724	30631-30703	RF00005	tRNA	Gene	tRNA	TCCTCATGGCGCAGTGGATAGCGCGCTGGACTTCTAATCCAGAGGCCGCGGGTTCGAATCCCGTTGAGGATG
phaw_30.0000781	16431-16504	RF00005	tRNA	Gene	tRNA	GGCCAGTATGGGGATCGAACCCACGACATCCGCGTTATCAGCACGGCGCTCTAACCGACTGAGCTAACAGGCC
phaw_30.0000884	299121-299192	RF00005	tRNA	Gene	tRNA	GGGGTGTAGCTCAGTGGTAGAGCATTCGACTGCAGATCGAGAGGTCCCCGGTTCAAACCCGGGCGCCCCCT
phaw_30.0000910	20769-20840	RF00005	tRNA	Gene	tRNA	GCCGTGACCAGGATTCGAACCTGGGTTATTGCGGCCACAACGCAATGTACTAACCACTATACGATCACGGC
phaw_30.0000915	180296-180368	RF00005	tRNA	Gene	tRNA	GCCTGTTAGCTCAGGGGCAGAGCACTCGATCGGATTTACGAGAGGTCGCAGGTTCGAGTCCTGCACAGGCTA
phaw_30.0000976	6455-6527	RF00005	tRNA	Gene	tRNA	GCCCGAACAGGGACTCGAACCCTGGACCCTCAGGTTAAAAGCCTGATGCTCTACCGACTGAGCCATCCGGGC
phaw_30.0001069	217671-217743	RF00005	tRNA	Gene	tRNA	ACCTCCGGCGGGACTCGAACCCGCAATCCTCGGCTTAGGAGGCCGATGCCTTATCCATTGGGCCACGGAGGC
phaw_30.0001128	86370-86441	RF00005	tRNA	Gene	tRNA	GCCGTGACCAGGATTCGAACCTGGGTTATTGCGGCCACAACGCAATGTACTAACCACTATACGATCACGGC
phaw_30.0001140	73326-73398	RF00005	tRNA	Gene	tRNA	GCCCAGACCCGGGATCGAACCGGGGACCTTTAGATCTTCAGTCTAACGCTCTCCCAACTGAGCTATCTAGGC
phaw_30.0001165	161069-161140	RF00005	tRNA	Gene	tRNA	TCCCCGGCGGGGAATCGAACCCCGGTCTCCCGCGTGACAGGCGGGGATACTCACCACTATACTACCGAGGA
phaw_30.0001189	6631-6703	RF00005	tRNA	Gene	tRNA	GCCCCGAGTGAGGATCGAACTCACGACCTTCAGATTATGAGACTGACGCGCTGCCTACTGCGCTACCGAGGC
phaw_30.0001189	13555-13636	RF00005	tRNA	Gene	tRNA	GTAGCGTGGCCGAGCGGGCTAAGGCGCTAGTTCGAGGCACCAGTCTCTTCGGAGGCGTGAGTTCGAATCCCACCGCTGCCA
phaw_30.0001189	21792-21864	RF00005	tRNA	Gene	tRNA	GGAGCTGCGGGGTATCGATCCCCGTACCTCTCGCATGCTAAGCGAGCGCTCTACCATTTGAGCTACAGCCCC
phaw_30.0001189	23171-23252	RF00005	tRNA	Gene	tRNA	GTAGCGTGGCCGAGCGGTCTAAGGCGCTGGTTTAAGGCACCAGTCTCTTCGGAGGCGTGGGTTCGAATCCCACCGCTGCCA
phaw_30.0001189	24057-24138	RF00005	tRNA	Gene	tRNA	GTAGCGTGGCCGAGCGGTCTAAGGCGCTGGTTTAAGGCACCAGTCTCTTCGGAGGCGTGGGTTCGAATCCCACCGCTGCCA
phaw_30.0001189	28167-28239	RF00005	tRNA	Gene	tRNA	GGTTCCTACCGAGACCCGAACTCGGATTGTTGGATTCAGAGTCCAAAGTGCTAACCATTACACTATAGAACC
phaw_30.0001189	29116-29187	RF00005	tRNA	Gene	tRNA	GTTCTATGGTGTAATGGTTAGCACTTTGGACTCTGAATCCAACAATCCGAGTTCGAGTCTCGGTAGAACCT
phaw_30.0001189	32252-32324	RF00005	tRNA	Gene	tRNA	GGAGCTGCGGGGTATCGATCCCCGTACCTCTCGCATGCTAAGCGAGCGCTCTACCATTTGAGCTACAGCCCC
phaw_30.0001189	33200-33272	RF00005	tRNA	Gene	tRNA	GGAGCTGCGGGGTATCGATCCCCGTACCTCTCGCATGCTAAGCGAGCGCTCTACCATTTGAGCTACAGCCCC
phaw_30.0001189	34678-34749	RF00005	tRNA	Gene	tRNA	GTTCTATGGTGTAATGGTTAGCACTTTGGACTCTGAATCCAACAATCCGAGTTCGAGTCTCGGTAGAACCT
phaw_30.0001189	38728-38800	RF00005	tRNA	Gene	tRNA	GGAGCTGCGGGGTATCGATCCCCGTACCTCTCGCATGCTAAGCGAGCGCTCTACCATTTGAGCTACAGCCCC
phaw_30.0001189	46614-46686	RF00005	tRNA	Gene	tRNA	GGAGCTGCGGGGCATCGATCCCCGTACCTCTCGCATGCTAAGCGAGCGCTCTACCATTTGAGCTACAGCCCC
phaw_30.0001237	394565-394638	RF00005	tRNA	Gene	tRNA	GGCCAGTATGGGGATCGAACCCACGGCATCCGCGTTATCAGCACGGCGCTCTAACCGACTGAGCTAACCGGCC
phaw_30.0001420	29664-29745	RF00005	tRNA	Gene	tRNA	GGCAGCGGTGGGATTCGAACCCACGCCTCCGGAGAGACTGGAGCCTAAATCCAGCGCCTTAGACCACTCGGCCACGCTACC
phaw_30.0001422	128445-128517	RF00005	tRNA	Gene	tRNA	GTAGGCTGGCTCAGTCGGTAGAGCACGAGACTCTAAATCTCGGGGTCGTGGGCTCGAGCCCCACGTTGGGCG
phaw_30.0001492	61848-61919	RF00005	tRNA	Gene	tRNA	CCCGTGTGGTCAAGTGGCTAGGATACGCGGCTCTCACCCGCGAGGCCCGGGTTCAATTCCCGGCACGGGAA
phaw_30.0001492	80994-81065	RF00005	tRNA	Gene	tRNA	ACCAGTGCCGGGAATTGAACCCGGGCATAGCGGGTGAGAGCCGCGTATCCTAGCCACTAGACCACACGGGA
phaw_30.0001492	89166-89229	RF00005	tRNA	Gene	tRNA	GTGCCGGGAATTGAACCGGGCCTCGCGGGTGAGAGCCGCGTATCCTAGCCACTTGACCACACG
phaw_30.0001492	89665-89736	RF00005	tRNA	Gene	tRNA	TCCCGTGCCGGGAATTGAACCCGGGCCTCGCGGGTGAGAGCCGCGTATCCTAGCCTCTAGACCACACGGGA
phaw_30.0001492	141384-141455	RF00005	tRNA	Gene	tRNA	CCCGTGTGGTCAAGTGGCTAGGATACGCGGCTCTCACCCGCGAGGCCCGGGTTCAATTCCCGGCACGGGAA
phaw_30.0001492	143601-143672	RF00005	tRNA	Gene	tRNA	TCCGTGTGGTCTAGTGGCTAGGATACACAGCTCTCACCCGCGAGGCCCGGGTTCAATTCCCGGCACGGGAA
phaw_30.0001492	145168-145239	RF00005	tRNA	Gene	tRNA	CCCGAGTGGTCTAGCGAATAGGATACGCGGCTCTCACCCGTGAGGCCCGGGTTCAATTCCTGACACAGGAG
phaw_30.0001492	145911-145982	RF00005	tRNA	Gene	tRNA	CCCGTGTGGTCTAGTGGCTAGGATACGCGGCTCTCACCCGCGAGGCCCGGGTTCAATTCCCGGCACGGGAA
phaw_30.0001492	146857-146928	RF00005	tRNA	Gene	tRNA	CTCGTGTGGTCTAGTGGCTAGGATACGCGGCTCTCACCCGCGAGGCCCGGGTTTAATTCCCGGCACGGGAA
phaw_30.0001492	147608-147679	RF00005	tRNA	Gene	tRNA	CCCGTGTGGTCTAGTGGCTAGGATACGCGGCTCTCACCCGCGAGGCCCGGGTTCAATTCCCGGCACGGGAA
phaw_30.0001521	284919-284990	RF00005	tRNA	Gene	tRNA	CGCCGCTGGTGTAGTGGTTAGCATGCAAGATTCCCAATCTTGCGAGTCGGGTTCGATTCCCGGGCGGCGCA
phaw_30.0001545	21392-21463	RF00005	tRNA	Gene	tRNA	GCCCCATGGCGCAATGGTAGCGCGTCTGACTCCAGATCAGAAGGTTGGGTGTTCGAGTCACTCTGGGGTCA
phaw_30.0001545	31164-31235	RF00005	tRNA	Gene	tRNA	GTTCTATGGTGTAATGGTTAGCACTCTGGACTTTGAATCCAGCGATCCGAGTTCGAGTCTCGGTAGAACCT
phaw_30.0001545	72442-72530	RF00005	tRNA	Gene	tRNA	CCCCAGTGGCGCAATCGGTTAGCGCGCGGTACTTATACGACAGTATTGAGCCATGCCGAGGTTGTGAGTTCGAGCCTCACCTGGGGCA
phaw_30.0001545	115076-115147	RF00005	tRNA	Gene	tRNA	GCCCCATGGCGCAATGGTAGCGCGTCTGACTCCAGATCAGAAGGTTGGGTGTTCGAGTCACTCTGGGGTCA
phaw_30.0001545	125030-125101	RF00005	tRNA	Gene	tRNA	GTTCTATGGTGTAATGGTTAGCACTCTGGACTTTGAATCCAGCGATCCGAGTTCGAGTCTCGGTAGAACCT
phaw_30.0001545	125418-125489	RF00005	tRNA	Gene	tRNA	GACCCCAGAGTGACTCGAACACCCAACCTTCTGATCTGGAGTCAGACGCGCTACCATTGCGCCATGGGNNN
phaw_30.0001545	170503-170591	RF00005	tRNA	Gene	tRNA	CCCCAGTGGCGCAATCGGTTAGCGCGCGGTACTTATACGACAGTATTGAGCCATGCCGAGGTTGTGAGTTCGAGCCTCACCTGGGGCA
phaw_30.0001614	120745-120817	RF00005	tRNA	Gene	tRNA	GCCCCGAGTGAGGATCGAACTCACGACCTTCAGATTATGAGACTGACGCGCTGCCTACTGCGCTACCGAGGC
phaw_30.0001707	65205-65275	RF00005	tRNA	Gene	tRNA	CGCCGCTGGTGTAGTGGTATCATGCAAGATTCCCATTCTTGCGACCCGGGTTCGATTCCCGGGCGGCGCA
phaw_30.0001707	129332-129404	RF00005	tRNA	Gene	tRNA	GCCACCAGGGAGAATTGAACTCCCGACCCCTGGTTTACAAGACCAGTGCTCTAACCACTGAGCTATGGAGGC
phaw_30.0001707	167953-168026	RF00005	tRNA	Gene	tRNA	GCCCCCGGGTGGGCTCGAACCACCAACCTTTCGGTTAACAGCCGAACGCGCTAACCGATTGCGCCACGGAGGC
phaw_30.0001707	381495-381565	RF00005	tRNA	Gene	tRNA	GCGCCGCCCGGGAATCGAACCCGGGTCGCAAGAATGGGAATCTTGCATGATACCACTACACCAGCGGCGC
phaw_30.0001724	17288-17369	RF00005	tRNA	Gene	tRNA	GCGAGGTGGCCGAGTGGTTAAGGCGTTGGACTGCTAATCCAATAAGGTCTCCGTGCGTGAGTTCGAATCTCATCCTCGTCG
phaw_30.0001724	170267-170348	RF00005	tRNA	Gene	tRNA	GCGAGGTGGCCGAGTGGTTAAGGCGTTGGACTGCTAATCCAATACGGTCTCCGTGCGTGAGTTCGAATCTCATCCTCGTCG
phaw_30.0001725	71333-71404	RF00005	tRNA	Gene	tRNA	CAATGGTGATATAGTGGTGAGCATAGCTACCTTCCAAGCAGTTGACCCGGATTCGGTTCCCGGCCATCGCA
phaw_30.0001725	71417-71490	RF00005	tRNA	Gene	tRNA	CCTCCGTGGCTCAATCGGTTAGCACGTTCGGCTGTTAACCGAAAGGTTGGTGGTTCGGGCCCACCTAGGGGCG
phaw_30.0001728	178946-179018	RF00005	tRNA	Gene	tRNA	GCCCAGACCCGGGATCGAACCGGGGACCTTTAGATCTTCAGTCTAACGCTCTCCCAACTGAGCTATCTAGGC
phaw_30.0001728	200585-200657	RF00005	tRNA	Gene	tRNA	GCCCAGACCCGGGATCGAACCGGGGACCTTTAGATCTTCAGTCTAACGCTCTCCCAACTGAGCTATCTAGGC
phaw_30.0001728	203934-204006	RF00005	tRNA	Gene	tRNA	GCCCAGACCCGGGATCGAACCGGGGACCTTTAGATCTTCAGTCTAACGCTCTCCCAACTGAGCTATCTAGGC
phaw_30.0001728	213826-213897	RF00005	tRNA	Gene	tRNA	GCGATGGCCGGGAATCGAACCCGGGTCAACTGCTTGGAAGGCAGCTATGCTCACCACTATACCACCATCGC
phaw_30.0001738	10761-10833	RF00005	tRNA	Gene	tRNA	GTTTCCGCCCGGGATCGAACCGGGGACCTTGCGCGTGTGAGGCGCACGTGATAACCACTACACTACGGAAAC
phaw_30.0001766	45625-45703	RF00005	tRNA	Gene	tRNA	GCCTGTTAGCTCAGTGGCAGAGCACCAGTCAGATCGGTTACTCACTGGAGGTCGCAGGTTCAATCCCTGTACAGGCTA
phaw_30.0001796	41868-41939	RF00005	tRNA	Gene	tRNA	GTCCTATGGTGTAATGGTTAGCACTTTGGACTCTGAATCCAACAATCCGAGTTCGAGTCTCGGTAGGACCT
phaw_30.0001796	236636-236707	RF00005	tRNA	Gene	tRNA	CCTCTTTAGCTCAGTGGCAGAGCACTGGTCTCGTAAACCAGGGGTCGTGAGTTCAAACCTCACAGGAGGCA
phaw_30.0001871	1225-1297	RF00005	tRNA	Gene	tRNA	CCTCGGTAGCGCAGTAGGCAGCGCGTCAGTCTCATAATCTGAAGGTCGTGAGTTCGATCCTCACTCGGGGCA
phaw_30.0001871	1591-1663	RF00005	tRNA	Gene	tRNA	CCTCGGTAGCGCAGTAGGCAGCGCGTCAGTCTCATAATCTGAAGGTCGTGAGTTCGATCCTCACTCGGGGCA
phaw_30.0001871	2009-2081	RF00005	tRNA	Gene	tRNA	GGGCTGTAGCTCAAATGGTAGAGCGCTCGCTTAGCATGCGAGAGGTACGGGGATCGATACCCCGCAGCTCCA
phaw_30.0001871	7156-7228	RF00005	tRNA	Gene	tRNA	GGAGCTGCGGGGCATCGATTCCCGTACCTCTCGCATGCTAAGCGAGCGCTCTACCATTTGAGCTACAGCCCC
phaw_30.0001871	11250-11322	RF00005	tRNA	Gene	tRNA	CCTCGGTAGCGCAGTAGGCAGCGCGTCAGTCTCATAATCTGAAGGTCGTGAGTTCGATCCTCACTTGGGGCA
phaw_30.0001871	16232-16313	RF00005	tRNA	Gene	tRNA	GTAGCGTGGCCGAGCGGTCTAAGGCGCTGGTTTAAGGCACCAGTCTCTTCGGAGGCGTGGGTTCGAATCCCACCGCTGCCA
phaw_30.0001871	122314-122385	RF00005	tRNA	Gene	tRNA	GACCCCAGAGTGACTCGAACACCCAACCTTCTGATCTGGAGTCAGACGCGCTACCATTGCGCCATAGGGCC
phaw_30.0001871	131864-131936	RF00005	tRNA	Gene	tRNA	CCTCGGTAGCGCAGTAGGCAGCGCGTCAGTCTCATAATCTGAAGGTCGTGAGTTCGATCCTCACTCGGGGCA
phaw_30.0001871	132245-132317	RF00005	tRNA	Gene	tRNA	CCTCGGTAGCGCAGTAGGCAGCGCGTCAGTCTCATAATCTGAAGGTCGTGAGTTCGATCCTCACTCGGGGCA
phaw_30.0001871	132704-132775	RF00005	tRNA	Gene	tRNA	GGGCTGTAGCTCAAATGGTAGAGCGCTCGCTTAGCATGCGAGAGGTACGGGGATCGATACCCGCAGCTCCA
phaw_30.0001871	141146-141218	RF00005	tRNA	Gene	tRNA	GGAGCTGCGGGGCATCGATCCCCGTACCTCTCGCATGCTAAGCGAGCGCTCTACCATTTGAGCTACAGCCCC
phaw_30.0001871	142736-142808	RF00005	tRNA	Gene	tRNA	CCTCGGTAGCGCAGTAGGCAGCGCGTCAGTCTCATAATCTGAAGGTCGTGAGTTCGATCCTCACTCGGGGCA
phaw_30.0001871	144607-144679	RF00005	tRNA	Gene	tRNA	CCTCGGTAGCGCAGTAGGCAGCGCGTCAGTCTCATAATCTGAAGGTCGTGAGTTCGATCCTCACTCGGGGCA
phaw_30.0001871	148545-148626	RF00005	tRNA	Gene	tRNA	GTAGCGTGGCCGAGCGGTCTAAGGCGCTGGTTTAAGGCACCAGTCTCTTCGGAGGCGTGGGTTCGAATCCCACCGCTGCCA
phaw_30.0001871	149344-149425	RF00005	tRNA	Gene	tRNA	GTAGCGTGGCCGAGCGGTCTAAGGCGCTGGTTTAAGGCACCAGTCTCTTCGGAGGCGTGGGTTCGAATCCCACCGCTGCCA
phaw_30.0001876	72991-73062	RF00005	tRNA	Gene	tRNA	TCCCGTGCCGGGAATCGAACCCGGGCCTCGCGGGTGAGAGCCGCGTATCCTAGCCACTAGACCACACGGGT
phaw_30.0002163	10152-10224	RF00005	tRNA	Gene	tRNA	GCCCAACGTGGGGCTCGAACCCACGACCCCGAGATTAAGAGTCTCGTGCTCTACCGACTGAGCTAGCCGGGC
phaw_30.0002163	86451-86523	RF00005	tRNA	Gene	tRNA	GCCTGGGTGGGATTCGAACCCACACTCTTTAAACTTTGAAGGTAGCGCTCTAGCCAATCAAGCTATCAAAGC
phaw_30.0002231	10627-10700	RF00005	tRNA	Gene	tRNA	CCCGGCTGAGCTCAGTAGGTAGAGCACGAGACTCTTAATCTCGGGGTCGTGGGTTCGAGCCCCACGTTGGGCG
phaw_30.0002491	98108-98179	RF00005	tRNA	Gene	tRNA	GGGGGCGCCCGGGTTTGAACCGGGGACCTCTCGATCTGCAGTCGAATGCTCTACCACTGAGCTACACCCCC
phaw_30.0002491	98862-98934	RF00005	tRNA	Gene	tRNA	GTGCTTACCTGGGCTCGAACCAGGGACCTTCTGTGTGTTAGACAGACGTGATAACCACTACACCATAAGCAC
phaw_30.0002491	101297-101368	RF00005	tRNA	Gene	tRNA	GGGGGCGCCCGGGTTTGAACCGGGGACCTCTCGATCTGCAGTCGAATGCTCTACCACTGAGCTACACCCCC
phaw_30.0002491	101615-101686	RF00005	tRNA	Gene	tRNA	GGGGTGTAGCTCAGTGGTAGAGCATTCGACTGCAGATCGAGAGGTCCCCGGTTCAAACCCGGGCGCCCCCT
phaw_30.0002706	47438-47493	RF00005	tRNA	Gene	tRNA	CTCAGTCGGTAGAGCACGAGACGCTTAATCTCTGGGTCGTGGGTTCGAGCCCCAC
phaw_30.0002726	97326-97398	RF00005	tRNA	Gene	tRNA	GCCCCGAGTGAGGATCGAACTCACGACCTTCAGATTATGAGACTGACGCGCTGCCTACTGCGCTACCGAGGC
phaw_30.0002773	27187-27259	RF00005	tRNA	Gene	tRNA	GCCCCGAGTGAGGATCGAACTCACGACCTTCAGATTATGAGACTGACGCGCTGCCTACTGCGCTACCGAGGC
phaw_30.0002855	334248-334319	RF00005	tRNA	Gene	tRNA	GCAGAGTGGCGCAGCGGAAGCGTGCTGGGCCCATAACCCAGAGGTCCGTGGATCGAAACCACGCTCTGCTA
phaw_30.0002855	334905-334976	RF00005	tRNA	Gene	tRNA	GCAGAGTGGCGCAGCGGAAGCGTGCTGGGCCCATAACCCAGAGGTCCGTGGATCGAAACCACGCTCTGCTA
phaw_30.0002855	356668-356752	RF00005	tRNA	Gene	tRNA	CTTCGATAGCTCAGTTGGTAGAGCGGTGGACTGTAGTGGTAATCAGCTATCCATAGGTCACTGGTTCGAATCCGGTTCGAAGGA
phaw_30.0002855	362994-363078	RF00005	tRNA	Gene	tRNA	CTTCGATAGCTCAGTTGGTAGAGCGGTGGACTGTAGTGGTTAACAGCTATCCATAGGTCACTGGTTCGAATCCGGTTCGAAGGA
phaw_30.0002894	23509-23581	RF00005	tRNA	Gene	tRNA	CCTCCGTGGCCTAATGGATAAGGCATTGGCCTCCTAAGCCAGGGATTGCGGGTTCGAGTCCAGCCGGAGGTT
phaw_30.0003029	56846-56917	RF00005	tRNA	Gene	tRNA	TCCCATGCCGGGTATCGAACCCGGGCCTCCTGGGTGAAAGCCAGGTATCCTAGCCACTAGACCACATGGGA
phaw_30.0003066	624025-624096	RF00005	tRNA	Gene	tRNA	GACCTGTGGTGTAATGGTTAGCACATCGGACTCTAAATCCGAAAACCCGGGTTCAATCCCCGGCAGGACCT
phaw_30.0003152	135377-135449	RF00005	tRNA	Gene	tRNA	GACCGTGACAGGACTCGAACCTGCAATCTTCGGATCCGAAGTCCGACGCCTTATCCATTAGGCCACACGGCC
phaw_30.0003157	7861-7934	RF00005	tRNA	Gene	tRNA	GGCCAGTATGGGGATCGAACCCACGACATCCACGTTATCAGCACGGTGCTCTAACCAACTGAGCTAACAGGCT
phaw_30.0003191	41195-41267	RF00005	tRNA	Gene	tRNA	GCCGTGTGGCCTAATGGATAAGGCGTCGGACTTCGGATCCGAAGATTGCAGGTTCGAGTCCTGTCACGGTCG
phaw_30.0003231	634191-634262	RF00005	tRNA	Gene	tRNA	GGGCCCACCGGGAATCGAACCCGGGTTCTCGGATTTAAAGTCCGATGTGCTAACCACTACACCATGGGCCC
phaw_30.0003236	87979-88051	RF00005	tRNA	Gene	tRNA	CCCGGCTAGCTCAGTCGGTAGAGCACGAGACTCTTAATCTCGGGGTCGTGGGTTCGAGCCCCACGTTGGGCG
phaw_30.0003236	95398-95470	RF00005	tRNA	Gene	tRNA	CCCGGCTAGCTCAGTCGGTAGAGCACGAGACTCTTAATCTCGGGGTCGTGGGTTCGAGCCCCACGTTGGGCG
phaw_30.0003236	96004-96076	RF00005	tRNA	Gene	tRNA	GCCCAACGTGGGGCTCGAACCCGCACACCCGAGATTAAGAGTCTCGTGCTCTACCGACTGAGCTAGCTGGGA
phaw_30.0003236	96460-96532	RF00005	tRNA	Gene	tRNA	GCCCAACGTGGGGCTCGAACCCACAACCCCGAGATTAAGAGTCTGGTGCTCTAACGACTGAGCTAGCCGGGC
phaw_30.0003312	192031-192088	RF00005	tRNA	Gene	tRNA	AGCTCAGTCGGTAGAGCACGAGACTCTTAATCTCGGGGTCGTGGGTTCGTGCCCCAC
phaw_30.0003621	75126-75199	RF00005	tRNA	Gene	tRNA	ACCCCCGGGTGGGCCTGAACCACCAACCTTTCGGTTAACAGCCGAACGTGCTAACCGATTGCGCCACGGAGGC
phaw_30.0003621	75212-75283	RF00005	tRNA	Gene	tRNA	GCGATGGCCGGGAACCGAATCCGGGTCAACTGCTTGGAAGGTAGCTATGCTCACCACTATACCACCATCGC
phaw_30.0003664	35682-35763	RF00005	tRNA	Gene	tRNA	CTGTGGTGTCCGAGTGGTTAAGGAGATGGACTAGAAATCCATTGGGCTCTGCCCGCACAGGTTCGAATCCTGTCTACAGCG
phaw_30.0003664	38242-38323	RF00005	tRNA	Gene	tRNA	CTGTGGTGTCCGAGTGGTTAAGGAGATGGACTTGAAATCCATTGGGCTCTGCCCGCACAGGTTCGAACCCTGTCCGCAGCG
phaw_30.0003664	41533-41614	RF00005	tRNA	Gene	tRNA	GCTGTAGACAGGATTCGAACCTGTGCGGGCAGAGCCCAATGGATTTCGAGTCCATCTCCTTAACCACTCGGACACCACAGC
phaw_30.0003664	54525-54606	RF00005	tRNA	Gene	tRNA	CTGTGGTGTCCGAGTGGTTAAGGAGATGGACTAGAAATCCATTGGGCTCTGCCCGCACAGGTTCGAATCCTGTCTACAGCG
phaw_30.0003664	58782-58863	RF00005	tRNA	Gene	tRNA	ATGTGGTGTCCGAGTGGTTAAAGAGATGGACTAGAATTCCATTGGGCTCTGCCCGCACAGGTTCGAATCCTGTCTACAGCG
phaw_30.0003664	61502-61583	RF00005	tRNA	Gene	tRNA	CTGTGGTGTCCGAGTGGTTAAGGAGATGGACTAGAAATCCATTGGGCTCTGCCCGCACAGGTTCGAATCCTGTCTACAGCG
phaw_30.0003664	67306-67387	RF00005	tRNA	Gene	tRNA	GCTGTAGACAGGATTCGAACCTGTGCGGGCAGAGCCCAATGGATTTCTAGTCCATCTCCTTAACCACTCGGACACCACAGC
phaw_30.0003664	105558-105639	RF00005	tRNA	Gene	tRNA	CTGTGGTGTCCGAGTGGTTAAGGAGATGGACTAGAAATCCATTGGGCTCTGCCCGCACAGGTTCGAATCCTGTCTACAGCG
phaw_30.0003664	107722-107803	RF00005	tRNA	Gene	tRNA	CTGTGGTGTCCGAGTGGTTAAGGAGATGGACTTGAAATCCATTGGGCTCTGCCCGCACAGGTTCGAACCCTGTCCGCAGCG
phaw_30.0003664	110315-110396	RF00005	tRNA	Gene	tRNA	GCTGTAGACAGGATTCGAACCTGTGCGGGCAGAGCCCAATGGATTTCGAGTCCATCTCCTTAACCACTCGGACACCACAGC
phaw_30.0003664	123572-123653	RF00005	tRNA	Gene	tRNA	CTGTGGTGTCCGAGTGGTTAAGGAGATGGACTAGAAATCCATTGGGCTCTGCCCGCACAGGTTCGAATCCTGTCTACAGCG
phaw_30.0003664	127105-127186	RF00005	tRNA	Gene	tRNA	CTGTGGTGTCCGAGTGGTTAAGGAGATGGACTAGAAATCCATTGGGCTCTGCCCGCACAGGTTCGAATCCTGTCTACAGCG
phaw_30.0003664	142507-142588	RF00005	tRNA	Gene	tRNA	CTGTGGTGTCCGAGTGGTTAAGGAGATGGACTAGAAATCCATTGGGCTCTGCCCGCACAGGTTCGAATCCTGTCTACAGCG
phaw_30.0003664	144004-144085	RF00005	tRNA	Gene	tRNA	CTCTGGTGTCCGAGTGGTTAAGGAGATGGACTAGAAATCCATTGGGCTCTGCCTGCACAGGATCGAATCCTGTCTACAGCG
phaw_30.0003719	86-156	RF00005	tRNA	Gene	tRNA	GCATCGGCCGGGAATCGAACCCGGGCCTCCCGCGTGGCAGGCGAGAATTCTACCACTGAACCACCGATGC
phaw_30.0003719	10376-10446	RF00005	tRNA	Gene	tRNA	GCATTGGCCGGGAATCGAACCCGGGCCTCCCGCGTGGCAGGCGAGAATTCTACCACTGAACCACCAATGC
phaw_30.0003719	80740-80811	RF00005	tRNA	Gene	tRNA	CCTCTATAGCTCAGGGGCAGAGCACTAGTCTCGTAAACTAGGGGTCGAGAGTTCGATTCTCTCTGGAGGCA
phaw_30.0003719	81115-81169	RF00005	tRNA	Gene	tRNA	CTCAGGGGCAGAGCACTAGTCTCGTAAACTAGGGGTCGAGAGTTCGATTCTCTC
phaw_30.0003719	98125-98196	RF00005	tRNA	Gene	tRNA	CCTCGGTAGTATAGTGGTGAGTATCCCCGCCTGTCACGCGGGAGACCGGGGTTCGATTCCCCGCCGGGGAG
phaw_30.0003823	109258-109373	RF00005	tRNA	Gene	tRNA	GTCAGAAGTGGGATTCGAACCCACGCCCTCCTGAGAGGACCAGAACGCCCAATGCCTCTCTGGGAAAGGCAAGTTGCCTTGAGTCTGGCGCCTTAGACCACTCGGCCATCCTGAC
phaw_30.0003874	169698-169769	RF00005	tRNA	Gene	tRNA	GCCGGTTAGCTCAGTCGGTTAGAGTGCCGTGCAGATAACGCGGATGTCGTGGGTTCGGTCCCCATATGTCA
phaw_30.0003892	146326-146396	RF00005	tRNA	Gene	tRNA	CATCGGTGGTTCAGTGGTAGAATTCTCGCCTGCCACGCGGGAGGCCCGGGTTCGATTCCCGGCCGATGCA
phaw_30.0003892	217396-217466	RF00005	tRNA	Gene	tRNA	CATCGGTGGTTCAGTGGTAGAATTCTCGCCTGCCACGCGGGAGGCCCGGGTTCGATTCCCGGCCGATGCA
phaw_30.0003984	141273-141354	RF00005	tRNA	Gene	tRNA	GCGAGGTGGCCGAGTGGTTAAGGCGTTGGACTGCTAATCCAATACGGTCTCCGTGCGTGAGTTCGAATCTCATCCTCGTCG
phaw_30.0004115	121359-121431	RF00005	tRNA	Gene	tRNA	CCAAACTAGCTCAGTCGGTAGAACACGAGACTCTTCATCTCGAGGTCGTGGGTTCGGGCTCCATGATGGGCG
phaw_30.0004134	57719-57834	RF00005	tRNA	Gene	tRNA	TCAGGATGGCCGAGTGGTCTAAGGCGCCAGACTCAAGGAAACTTGTCTCTCATTGAGAGACATTGGGCGTTCTGGTCCTCTCAGGAGGGCGTGGGTTCGAATCCCACTTCTGACA
phaw_30.0004162	26954-27014	RF00005	tRNA	Gene	tRNA	GCGGGGAATCGAACCCCGGTCTCCCGCGTGACAGGCGGGGATACTCACCACTATACTACC
phaw_30.0004165	66594-66654	RF00005	tRNA	Gene	tRNA	GCGGGGAATCGAACCCCGGTCTCCCGCGTGACATGCGGGGATTCTCACCACTATACTACC
phaw_30.0004192	32891-32962	RF00005	tRNA	Gene	tRNA	CCGTGATCGTATAGTGGTTAGTACATTGCGTTGTGGCCGCAATAACCCAGGTTCAAATCCTGGTCACGGCA
phaw_30.0004390	90369-90441	RF00005	tRNA	Gene	tRNA	GTCCCATGGTGAAGTGGTTAACCCATCGGACTTAAAATCGGAGAACTCGGGTTCAATTTCCAGGTGGGACCT
phaw_30.0004413	281633-281714	RF00005	tRNA	Gene	tRNA	CTGCGGTGTCCGAGTGGTTAAGGAGATGGACTCGAAATCCATTGGGCTCTGCCCGCACAGGTTCGAATCCTGTCCGCAGCG
phaw_30.0004413	282981-283062	RF00005	tRNA	Gene	tRNA	GCTGCAGACAGGATTCGAACCTGTGCGGGTAGAACCCAATGGATTTCTAGTCCATCTCCTTAACCGCTCGGACACCGCAGC
phaw_30.0004481	3892-3964	RF00005	tRNA	Gene	tRNA	GCCCGAACAGGGACTTGAACCCTGGACCCTCAGGTTAAAAGCCTGATGCTCTACCGACTGAGCCATCCGGGC
phaw_30.0004499	119504-119575	RF00005	tRNA	Gene	tRNA	CCTATGTGGTCTAGTGGCTAGGATACGCGGCTCTCACCCGCGAGGCCCGGGTTCGATTCCCGGCACGGGAA
phaw_30.0004517	236704-236776	RF00005	tRNA	Gene	tRNA	GCCCAGACCCGGGATCGAACCGGGGACCTTTAGATCTTCAGTCTAACGCTCTCCCAACTGAGCTATCTAGGC
phaw_30.0004517	249527-249598	RF00005	tRNA	Gene	tRNA	GCAGAGTGGCGCAGAGGAAGCGTGCTGGGCCCATAACCCAGAGGTCCGTGGATCGAAACCACGCTCTGCTA
phaw_30.0004517	252361-252432	RF00005	tRNA	Gene	tRNA	GCAGAGTGGCGCAGAGGAAGCGTGCTGGGCCCATAACCCAGAGGTCCGTGGATCGAAACCACGCTCTGCTA
phaw_30.0004517	257957-258029	RF00005	tRNA	Gene	tRNA	CCTAGATAGCTCAGTTGGGAGAGCGTTAGACTGAAGATCTAAAGGTCCCCGGTTCGATCCCGGGTCTGGGCA
phaw_30.0004517	267880-267951	RF00005	tRNA	Gene	tRNA	GCGATGGCCGGGAAACGAACCCGGGTCAACTGCTTGGAAGGCAGCTATGCTCACCACTATACCACCATCGC
phaw_30.0004517	270604-270675	RF00005	tRNA	Gene	tRNA	GCGATGGCCGGGAATCGAACCCGGGTCAACTGCTTGGAAGGCAGCTATGCTCACCACTATACCACCATCGC
phaw_30.0004517	271760-271831	RF00005	tRNA	Gene	tRNA	AGCAGAGCGTGGTTTCGATCCACGGACCTCTGGGTTATGGGCCCAGCACGCTTCCTCTGCGCCACTCTGCT
phaw_30.0004517	279258-279330	RF00005	tRNA	Gene	tRNA	CCTAGATAGCTCAGTTGGGAGAGCGTTAGACTGAAGATCTAAAGGTCCCCGGTTCGATCCCGGGTCTGGGCA
phaw_30.0004517	282886-282957	RF00005	tRNA	Gene	tRNA	CGATGGTGGTATAGTGGTGAGCATAGCTGCCTTCCAAGCAGTTGACCCGGGTTCGATTCCCGGCCATCGCA
phaw_30.0004517	288745-288816	RF00005	tRNA	Gene	tRNA	GCGATGGCCGGGAATCGAACCCGGGTCAACTGCTTGGAAGGCAGCTATGCTCACCACTATACCACCATCGC
phaw_30.0004563	50490-50563	RF00005	tRNA	Gene	tRNA	GGCCAGTATGGGGATCGAACCCACGACATCCGCGTTATCAGCACGGCGCTCTAACCGACTGAGCTAACCGGCC
phaw_30.0004652	581957-582028	RF00005	tRNA	Gene	tRNA	CCGCTATAGCTCAGGGGCAGAGCACTAGTCTCGTAAACTAGGGGTCGAGAGTTCGATTCTCTCTGGCGGCA
phaw_30.0004675	293530-293603	RF00005	tRNA	Gene	tRNA	ACCGGTTAGCTCAATTAGTTAGAGCGCCGTGCTGAGAACGCGGATGTCATGGGTTCGATCCCCATACTGGCCA
phaw_30.0004678	235300-235381	RF00005	tRNA	Gene	tRNA	CTGTGGTGTCCGAGTGGTTAAGGAGATGGACTTGAAATCCATTGGGCTCTGCCCGCACAGGTTCGAACCCTGTCCGCAGCG
phaw_30.0004691	34581-34653	RF00005	tRNA	Gene	tRNA	CCCGGCTAGCTCAGTCGGTAGAGCACGAGACTCTTAATCTCGGGGTCGTGGGTTCGAGCCCCACGTTGGGCG
phaw_30.0004697	368372-368445	RF00005	tRNA	Gene	tRNA	GCCGGTTAGCTCAGTCGGTTGGAGCGCCGTTCTGATAACGCGGATGTCGTGGGTTTGATCCCCATACTGGCCA
phaw_30.0004698	373034-373105	RF00005	tRNA	Gene	tRNA	TCCCATGCCGGGAATCGAACCCGGGCCTCCTGGGTGAAAGCCAGGTATCCTAGCCACTAGACCACATGGGA
phaw_30.0004707	14589-14661	RF00005	tRNA	Gene	tRNA	GGTGGCCGAGTGGTTAAGGCGTTGGACTGCTAATCCAATACGGTCTCCATGCGTGAGTTCAAATCTCATCCT
phaw_30.0004707	14760-14841	RF00005	tRNA	Gene	tRNA	GAAAGGTGGCTGAGTGGTTAAGGCGTTGGACTGCTAATCCAATACGGTGTCCGTGCGTGAGTTCGAATCTCATCCTCGTCG
phaw_30.0004707	14935-15016	RF00005	tRNA	Gene	tRNA	GTGAGGTGGCCGAGTGGTTAAAGCGTTGGACTGCTAATCGAATATGGTCGCTATGCGTGAGTTCGAATCCCATCCTTGTCG
phaw_30.0004707	15922-16003	RF00005	tRNA	Gene	tRNA	GCGAGGTGGCCGAGTGGTTAAGGCGTTGGACTGCTAATCCAATACGGTCTCCGTGCGTGAGTTCGAATCTCATCCTCGTCG
phaw_30.0004707	16097-16178	RF00005	tRNA	Gene	tRNA	GCGAGGTGGCCGAGTGGTTAAGGCGTTGGACTGCTAATCCAATACGGTCTCCGTGCGTGAGTTCGAATCTCATCCTCGTCG
phaw_30.0004707	16269-16350	RF00005	tRNA	Gene	tRNA	GCGACGTGGCCGAGTGGTTAAGGCGTTGGACTGCTAATCCAATACGGTCTCCGTGCGTGAGTTCGAATCTCATCCTCGTCG
phaw_30.0004707	16444-16525	RF00005	tRNA	Gene	tRNA	GCGAGGTGGCCGAGTGGTTAAGGCGTTGGACTGCTAATCCAATACGGTCTCCGTGCGTGAGTTCGAATCTCATCCTCGTCG
phaw_30.0004711	253612-253683	RF00005	tRNA	Gene	tRNA	TCCCATGCCGGGAATCGAACCCGGGCCTCCTGGGTGAAAGCCAGGTATCCTAGCCACTAGACCACATGGGA
phaw_30.0004716	352379-352460	RF00005	tRNA	Gene	tRNA	GCGAGGTGGCCGAGTGGTTAAGGCGTTGGACTGCTAATCCAATACGGTCTCCGTGCGTGAGTTCGAATCTCATCCTCGTCG
phaw_30.0004716	360636-360717	RF00005	tRNA	Gene	tRNA	GCGAGGTGGCCGAGTGGTTAAGGCGTTGGACTGCTAATCCAATACGGTCTCCGTGCGTGAGTTCGAATCTCATCCTCGTCG
phaw_30.0004716	360816-360897	RF00005	tRNA	Gene	tRNA	GCGAGGTGGCCGAGTGGTTAAGGCGTTGGACTGCTAATCCAATACGGTCTCCGTGCGTGAGTTCGAATCTCATCCTCGTCG
phaw_30.0004739	287715-287796	RF00005	tRNA	Gene	tRNA	CTGTGGTGTCCGAGTGGTTAAGGAGATGGACTAGAAATCCATTGGGCTCTGCCCGCACAGGTTCGAATCCTGTCTACAGCG
phaw_30.0004739	292323-292404	RF00005	tRNA	Gene	tRNA	CTGCGGTGTCCGAGTGGTTAAGGAGATGGACTTGAAATCCATTGGGCTCTGCCCGCACAGGTTCGAACCCTGTCCGCAGCG
phaw_30.0004747	324972-325043	RF00005	tRNA	Gene	tRNA	GGACCAACCGGGACTCGAACCCGGGTTTTCGGATTTAAAGTCCGACGTGCTAGCCACTACACCATCGGCCC
phaw_30.0004747	366776-366847	RF00005	tRNA	Gene	tRNA	GAGCCCACCGGGATTCGAACCCGGGTTCTCGGTTTTAAAGACCGATGTGCTAACCACTGCACCATGAGCCC
phaw_30.0004768	84230-84302	RF00005	tRNA	Gene	tRNA	AGCCTGTGCAGGACTCGAACCTGCGACCCCTCGTAAATCCGATCGAGTGCTCTGCCACTGAGCTAACAGGCA
phaw_30.0004768	96931-97003	RF00005	tRNA	Gene	tRNA	AGCCTGTGCAGGACTCGAACCTGCCACCTCTCGTAAATCCGATCGAGTGCTCTGCCCCTGAGCTAACAGGNN
phaw_30.0004768	103066-103138	RF00005	tRNA	Gene	tRNA	AGCCTGTGCAGGACTCGAACCTGCCACCTCTCGTAAATCCGATCGAGTGCTCTGCCCCTGAGCTAACAGGCA
phaw_30.0004768	108783-108855	RF00005	tRNA	Gene	tRNA	AGCCTGTGCAGGACTCGAACCTGCCACCTCTCGTAAATCCGATCGAGTGCTCTGCCCCTGAGCTAACAGGNN
phaw_30.0004768	119596-119668	RF00005	tRNA	Gene	tRNA	AGCCTGTGCAGGACTCGAACCTGCGACCTCTCGTAAATCCGATCGAGTGCTCTGCCACTGAGCTAACAGGCA
phaw_30.0004794	85529-85612	RF00005	tRNA	Gene	tRNA	CCTTCGAACCGGATTCGAACCAGTGACCTATGGATAGCTGAGACCTCTACAGTCCACCGCTCTACCAACTGAGCTATCGAAGG
phaw_30.0004794	93169-93252	RF00005	tRNA	Gene	tRNA	CTTCGATAGCTCAGTTGGTAGAGCGGTGGACTGTAGAGGTCTCAGCTATCCATAGGTCACTGGTTCGAATCCGGTTCGAAGGA
phaw_30.0004794	94393-94476	RF00005	tRNA	Gene	tRNA	CTTCGATAGCTCAGTTGGTAGAGCGGTGGACTGTAGAGGTCTCAGCTATCCATAGGTCACTGGTTCGAATCCGGTTCGAAGGA
phaw_30.0004794	95292-95364	RF00005	tRNA	Gene	tRNA	CTTCGATAGCTCAGTTGGTAGAGCGATGGACTGTAGAGGTTTCCGCTATCCATAGGTCACTGGTTCGAAGGA
phaw_30.0004794	96947-97018	RF00005	tRNA	Gene	tRNA	TCCCATGCCGGGAATCGAACCCGGGCCTCCTGGGTGAAAGCCAGGTATCCTAGCCACTAGACCACATGGGA
phaw_30.0004808	107049-107120	RF00005	tRNA	Gene	tRNA	GGCTCATGGTGCAATGGTTAGCATATCGAACTTTAAAACCGAGAGTCCGGGTTCAACTCCAGGTGTACCCA
phaw_30.0004830	161207-161279	RF00005	tRNA	Gene	tRNA	GACCGTGACAGGACTCGAACCTGAAATCGTCGGATCCGAAGTCCGACGCCTTATCCATTAGGCCACACGGCC
phaw_30.0004859	85907-85980	RF00005	tRNA	Gene	tRNA	CCCGGTTAGCTCAGTTGGTTAGAGCGCCGTGCTGATAACGCGGATGTCGTGGGTTCGATCCCCATACTGGCCA
phaw_30.0004893	94110-94181	RF00005	tRNA	Gene	tRNA	GGCTTGACCGGGATTTGAACCCGGGACCTCTCGCACCCTAAGCGAGAATCATACCCCTAGACCATCAAGCC
phaw_30.0004896	284901-284985	RF00005	tRNA	Gene	tRNA	CCTTCGAACCGGATCCGAACCAGTGACCTATGGATCACTGATAACCTCTACAGTCCACCACTCTACCAACTGAGCTATAGAAGG
phaw_30.0004906	144963-145036	RF00005	tRNA	Gene	tRNA	GCCGGTTAGCTCAGTTAGTTAGAGCACCGTGCTGATAACGCGGATGTCGTGGGCTCGTTCCCCATACTGGCCA
phaw_30.0004950	76112-76183	RF00005	tRNA	Gene	tRNA	GGCTTGACCGGGATTTGAACCCGGGACCTCTCGCACCCTAAGCGAGAATCATACCCCTAGACCATCAAGCC
phaw_30.0004950	116427-116498	RF00005	tRNA	Gene	tRNA	GTCCTATGGTGTAATGGTTAGCACTTTGGACTCTGAATCCAACAATCCGAGTTCGAGTCTCGGTAGGACCT
phaw_30.0004950	122801-122872	RF00005	tRNA	Gene	tRNA	GCTTGATGGTCTAGGGGTATGATTCTCGCTTAGGGTGCGAGAGGTCCCGGGTTCAAATCCCGGTCAAGCCC
phaw_30.0004950	139839-139911	RF00005	tRNA	Gene	tRNA	GGAGCTGCGGGGTATCGATCCCCGTACTTCTCGCATGCTAAGCGAGCGCTCTACCATTTGAGCTACAGCCCC
phaw_30.0004950	192173-192244	RF00005	tRNA	Gene	tRNA	CCCATGTGGTCTAGTGGCTAGGATACCTGGCTTTCACCCAGGAGGCCCGGGTTCGATTCCCGGCATGGGAA
phaw_30.0004950	221825-221896	RF00005	tRNA	Gene	tRNA	TCCCGTGCCGGGAATCGAACCCGGGCCTCGCGGGTGAGAGCCGCGTATCCTAGCCACTAGACCACACGGGA
phaw_30.0004959	109877-109948	RF00005	tRNA	Gene	tRNA	TCCCGAGCCGGGAATTGAACCCGGGCCTCGCGGATGAGAGCGGCGTATCCTAGCAACTAGATCACACGGGA
phaw_30.0004959	176964-177036	RF00005	tRNA	Gene	tRNA	GGGCTGTAGCTCAAATGGTAGAGCGCTCGCTTAGCATGCGAGAGGTAAGGGGATCGATACCCCGCAGCTCCA
phaw_30.0004959	177184-177255	RF00005	tRNA	Gene	tRNA	GGTTCTACCGAGACTCGAACTCGGATTGTTGGATTCAGAGTCCAAAGTGCTAACCATTACACCATAGAACC
phaw_30.0004966	209451-209522	RF00005	tRNA	Gene	tRNA	GGGGTGTAACTCAGTGGTAGAGTGTTCGCTTTGCATGCGAAAAGCCCCGGGTTCGATCCCCGGCACCTCCA
phaw_30.0004966	214354-214425	RF00005	tRNA	Gene	tRNA	GGGGTGTAACTCAGTGGTAGAGTGTTCGCTTCGCATGCGAAAAGCCCCGGGTTCGATCCCCGGCACCTCCA
phaw_30.0004966	226743-226815	RF00005	tRNA	Gene	tRNA	GGAGCTGCGGGGTATCGATCCCCGTACTTCTCGCATGCTAAGCGAGCGCTCTACCATTTGAGCTACAGCCCC
phaw_30.0004966	240781-240852	RF00005	tRNA	Gene	tRNA	GGAGGTGCCGGGGATCGAACCCGGGGCTTTTCGCATGCAAAGCGAACACTCTACCACTGAGTTACACCCCC
phaw_30.0004966	253032-253103	RF00005	tRNA	Gene	tRNA	GGGGTGTAACTCAGTGGTAGAGTGTTCGCTTTGCATGCGAAAAGCCCCGGGTTCGATCCCCGGCACCTCCA
phaw_30.0004987	190750-190831	RF00005	tRNA	Gene	tRNA	CTGCGGTGTCCGAGTGGTTAAGGAGATGGACTCGAAATCCATTGGGCTCTGCCCGCACAGGTTCGAATCCTGTCCGCAGCG
phaw_30.0004987	191545-191626	RF00005	tRNA	Gene	tRNA	GCTGCGGACAGGATTCGAACCTGTGCGGGCAGAGCCCAATGGATTTCAAGTCCATCTCCTTAACCACTCGGACACCGCAGC
phaw_30.0005008	209169-209241	RF00005	tRNA	Gene	tRNA	GCCCGAACAGGGACTCGAACCCTGGACCCTCAGGTTAAAAGCCTGATGCTCTACCGACTGAGCCATCCGGGC
phaw_30.0005026	202107-202178	RF00005	tRNA	Gene	tRNA	GGGGTGTAGCTCAGTGGTAGAGCATTCGACTGCAGATCGAGAGGTCCCCGGTTCAAACCCGGGCGCCCCCT
phaw_30.0005046	18743-18816	RF00005	tRNA	Gene	tRNA	GCCCCCGGGTGGGCTCGAACCACCAACCTTTCGGTTAACAGCCGAACGCGCTAACCGATTGCGCCACGGAGGC
phaw_30.0005046	21693-21766	RF00005	tRNA	Gene	tRNA	GCCCCCGGGTGGGCTCGAACCACCAACCTTTCGGTTAACAGCCGAACGCGCTAACCGATTGCGCCACGGAGGC
phaw_30.0005046	25027-25100	RF00005	tRNA	Gene	tRNA	GCCCCCGGGTGGGCTCGAACCACCAACCTTTCGGTTAACAGCCGAACGCGCTAACCGATTGCGCCACGGAGGC
phaw_30.0005046	25611-25683	RF00005	tRNA	Gene	tRNA	CCTTCATAGCTCAGGGGTTAGAGCGCTGGTCTAGTAAACCAGAGGCCGGGAGTTCGATTCTCCCTGAAGGCA
phaw_30.0005046	48091-48164	RF00005	tRNA	Gene	tRNA	CCTCCGTGGCGCAATCGGTTAGCGCGTTCGGCTGTTAACCGAAAGGTTGGTGGTTCGAGCCCACCCGGGGGCG
phaw_30.0005046	69918-69991	RF00005	tRNA	Gene	tRNA	CCTCCGTGGCGCAATCGGTTAGCGCGTTCGGCTGTTAACCGAAAGGTTGGTGGTTCGAGCCCACCCGGGGGCG
phaw_30.0005046	76627-76688	RF00005	tRNA	Gene	tRNA	AGGGAGAATCTAACTCCCGTCCTCTGGTTTACTAGACCAGCGCTGTAACTCCCGAGCTATG
phaw_30.0005046	83780-83853	RF00005	tRNA	Gene	tRNA	CCTCCGTGGCGCAATCGGTTAGCGCGTTCGGCTGTTAACCGAAAGGTTGGTGGTTCGAGCCCACCCGGGGGCG
phaw_30.0005046	89061-89134	RF00005	tRNA	Gene	tRNA	CCTCCGTGGCGCAATCGGTTAGCGCGTTCGGCTGTTAACCGAAAGGTTGGTGGTTCGAGCCCACCCGGGGGCG
phaw_30.0005046	90657-90730	RF00005	tRNA	Gene	tRNA	CCTCCGTGGCGCAATCGGTTAGCGCGTTCGGCTGTTAACCGAAAGGTTGGTGGTTCGAGCCCACCCGGGGGCG
phaw_30.0005046	92605-92678	RF00005	tRNA	Gene	tRNA	CCTCCGTGGCGCAATCGGTTAGCGCGTTCGGCTGTTAACCGAAAGGTTGGTGGTTCGAGACCACCCGCGGGCG
phaw_30.0005046	118274-118347	RF00005	tRNA	Gene	tRNA	CCTCCGTGGCGCAATCGGTTAGCGCGTTCGGCTGTTAACCGAAAGGTTGGTGGTTCGAGCCCACCCGGGGGCG
phaw_30.0005046	119025-119098	RF00005	tRNA	Gene	tRNA	CCTCCGTGGCGCAATCGGTTAGCGCGTTCGGCTGTTAACCGAAAGGTTGGTGGCTCGAGCCCACCCGGGGGCG
phaw_30.0005046	160514-160586	RF00005	tRNA	Gene	tRNA	CCTTCATAGCTCAGGGGTTAGAGCGCTGGTCTAGTAAACCAGAGGCCGGGAGTTCGATTCTCCCTGAAGGCA
phaw_30.0005126	353723-353839	RF00005	tRNA	Gene	tRNA	TCAGGATGGCCGAGTGGTCTAAGGCGCCAGACTCAAGGTATCACCTTCTCTGCCTTGCAGAGATTGGGCGTTCTGGTCCTCTCAGGAGGGCGTGGGTTCGAATCCCACTTCTGACA
phaw_30.0005168	6522-6593	RF00005	tRNA	Gene	tRNA	TCCCATGCCGGGAATCGAACCCGGGCCTCCTGGGTGAAAGCCAGGTATCCTAGCCACTAGACCACATGGGA
phaw_30.0005219	144548-144619	RF00005	tRNA	Gene	tRNA	GGTTCTACCGAGACTCGAACTCGGATCGCTGGATTCAAAGTCCAGAGTGCTAACCATTACACCATAGAACC
phaw_30.0005238	114767-114826	RF00005	tRNA	Gene	tRNA	AGCTCAGTCGGTAGAGCACGAGACTCTTAATCTCGGGGTCATGGGTTCGAGCTTCACGT
phaw_30.0005255	93469-93550	RF00005	tRNA	Gene	tRNA	CTGCGGTGTCCGAGTGGTTAAGGAGATGGACTCGAAATCCATTGGGCTCTGCCCGCACAGGTTCGAATCCTGTCCGCAGCG
phaw_30.0005255	94300-94381	RF00005	tRNA	Gene	tRNA	GCTGCAGACAGGATTCGAACCTGTGCGGGCAGAGCCCAATGGATTTCTAGTCCATCTCCTTAACCACTCGGACACCGCAGC
phaw_30.0005360	97751-97840	RF00005	tRNA	Gene	tRNA	CCCCAGTGGCGCAATCGGTTAGCGCGCGGTACTTATACGACAGTATTGAAGCTATGCCGAGGTTGTGAGTTCGAGCCTCACCTGGGGCA
phaw_30.0005360	135634-135722	RF00005	tRNA	Gene	tRNA	CCCCAGTGGCGCAATCGGTTAGCGCGCGGTACTTATACGACAGTATTGAGCTATGCCGAGGTTGTGAGTTCGAACCTCACCTGGGGCA
phaw_30.0005398	144315-144386	RF00005	tRNA	Gene	tRNA	CCGTGATCGTATAGTGGTTAGTACATTGCGTTGTGGCCGCAATAACCCAGATTCGAATCCTGGTCACGGCA
phaw_30.0005398	152886-152957	RF00005	tRNA	Gene	tRNA	ACGTGATCGTATAGTGGTTAGTACATTGCGTTGTGGCCGCAATAACCCAGGTTCGAATCCTGGTCACGGCA
phaw_30.0005398	159171-159242	RF00005	tRNA	Gene	tRNA	GCCGTGACCAGGATTCGAACCTGGGTTATTGCGGCCACAACGCAATGTACTAACCACTATACGATCACGGC
phaw_30.0005414	176533-176603	RF00005	tRNA	Gene	tRNA	GCGCCGCCCGGGAATCGAACCCGGGTCGCAAGAATGGGAATCTTGCATGATACCACTACACCAGCGGCGC
phaw_30.0005447	118967-119039	RF00005	tRNA	Gene	tRNA	AACCCGTGCAGGGTTCGAACCTGCGACTCCCCGTATTTAAGACGGGCGCCCTAACCAATGAGCTAACAGGCA
phaw_30.0005505	39801-39882	RF00005	tRNA	Gene	tRNA	CTGTGGTGTCCGAGTGGTTAAGGAGATGGACTAGAAATCCATTGGGCTCTGCCCGCACAGGTTCGAATCCTGTCTACAGCG
phaw_30.0005519	110409-110481	RF00005	tRNA	Gene	tRNA	GCCCAACGTGGGGCTCGAACCCACGACCCCGAGATTAAGAGTCTCGTGCTCTACCGACTAAGCTAGCTAGGC
phaw_30.0005534	21812-21884	RF00005	tRNA	Gene	tRNA	GCCCAGACCCGGGATCGAACCGGGGACCTTTAGATCTTCAGTCTAACGCTCTCCCAACTGAGCTATCTAGGC
phaw_30.0005556	2580-2651	RF00005	tRNA	Gene	tRNA	GTTCTATGGTGTAATGGTTAGCACTTTGGACTCTGAATCCAACAATCCGAGTTCGAGTCTCGGTAGAACCT
phaw_30.0005556	4179-4251	RF00005	tRNA	Gene	tRNA	GGAGCTGCGGGGTATCGATCCCCGTACCTCTCGCATGCTAAGCGAGCGCTCTACCATTTGAGCTACAGCCCC
phaw_30.0005574	52401-52474	RF00005	tRNA	Gene	tRNA	GCCGGTTAGCTCAGTCGGTTAGAGCGCCGTGCTAATAACGCGGATGTCGTGGGTTCGATCCCCATACTGGCCA
phaw_30.0005574	71008-71079	RF00005	tRNA	Gene	tRNA	CCCGTGTGGTCTAGTGGCTAGGATACGCGGCTCTCACCCGCGAGGCCCGGGTTCGATTCCCGGCACGGGAA
phaw_30.0005574	71304-71375	RF00005	tRNA	Gene	tRNA	CCCGTGTGGTCTAGTGGCTAGGATACGCGGCTCTCACCCGCGAGGCCCGGGTTCGATTCCCGGCACGGGAA
phaw_30.0005574	101523-101594	RF00005	tRNA	Gene	tRNA	TCCCGTGCCGGGAATCGAACCCGGGCCTCGCGGGTGAGAGCCGCGTATCCTAGCCACTAGACCACACGGGA
phaw_30.0005574	103979-104050	RF00005	tRNA	Gene	tRNA	CCCGTGTGGTCTAGTGGCTAGGATACGCGGCTCTCACCCGCGAGGCCCGGGTTCGATTCCCGGCACGGGAA
phaw_30.0005574	107716-107787	RF00005	tRNA	Gene	tRNA	TCCCGTGCCGGGAATCGAACCCGGGCCTCGCGGGTGAGAGCCGCGTATCCTAGCCACTAGACCACACGGGA
phaw_30.0005574	109333-109404	RF00005	tRNA	Gene	tRNA	TCCCGTGCCGGGAATCGAACCCGGGCCTCGCGGGTGAGAGCCGCGTATCCTAGCCACTAGACCACACGGGA
phaw_30.0005574	116605-116676	RF00005	tRNA	Gene	tRNA	CCCGTGTGGTCTAGTGGCTAGGATACGCGGCTCTCACCCGCGAGGCCCGGGTTCGATTCCCGGCACGGGAA
phaw_30.0005574	117060-117131	RF00005	tRNA	Gene	tRNA	CCCGTGTGGTCTAGTGGCTAGGATACGCGGCTCTCACCCGCGAGGCCCGGGTTCGATTCCCGGCACGGGAA
phaw_30.0005574	121225-121296	RF00005	tRNA	Gene	tRNA	TCCCGTGCCGGGAATCGAACCCGGGCCTCGCGGGTGAGAGCCGCGTATCCTAGCCACTAGACCACACGGGA
phaw_30.0005610	94364-94436	RF00005	tRNA	Gene	tRNA	GCCTTGTGGCGCAATGGATAACGCGTCCGCCTACGGAGCGGAAGATTCCAGGTTCGACCCCTGGCAAGGTCG
phaw_30.0005610	100927-101011	RF00005	tRNA	Gene	tRNA	CCTTCGAACCGGATTCGAACCAGTGACCTATGGATAGCTGATTACCGCTACAGTCCACCGCTCTACCAACTGAGCTATCGAAGG
phaw_30.0005610	122308-122379	RF00005	tRNA	Gene	tRNA	AGCAGAGCGTGGTTTCGATCCACGGACCTCTGGGTTATGGGCCCAGCACGCTTCCGCTGCGCCACTCTGCT
phaw_30.0005610	122949-123020	RF00005	tRNA	Gene	tRNA	AGCAGAGCGTGGTTTCGATCCACGGACCTCTGGGTTATGGGCCCAGCACGCTTCCGCTGCGCCACTCTGCT
phaw_30.0005616	57019-57090	RF00005	tRNA	Gene	tRNA	GGAGGTGCCGGGGATCGAACCCGGGGCTTTTCGCATGCGAAGCGAACACTCTACCACTGAGTTACACCCCC
phaw_30.0005616	62500-62571	RF00005	tRNA	Gene	tRNA	GTCCTATGGTGTAATGGTTAGCACTTTGGACTCTGAATCCAACAATCCGAGTTCGAGTCTCGGTAGGACCT
phaw_30.0005620	41370-41441	RF00005	tRNA	Gene	tRNA	AGCAGAGCGTGGTTTCGATCCACGGACCTCTGGGTTATGGGCCCAGCACGCTTCCGCTGCGCCACTCTGCT
phaw_30.0005719	22726-22798	RF00005	tRNA	Gene	tRNA	CCCGGATGGCTCAGTCGGTAGAGCATCAGGCTTTTAACCTGAGGGTCCAGGGTTCGAGTCCCTGTTCGGGCG
phaw_30.0005720	93416-93488	RF00005	tRNA	Gene	tRNA	ACCTCCGGCGGGACTCGAACCCGCAATCCTCGGCTTAGGAGGCCGATGCCTTATCCATTGGGCCACGGAGGC
phaw_30.0005770	17182-17254	RF00005	tRNA	Gene	tRNA	ATCCCTGCCGGGGGTCGAACCCGGGGCCTTTGGATTAGAAGTCCAACGCGCTTTCCACTGCGCCACAGGGAC
phaw_30.0005811	5204-5289	RF00005	tRNA	Gene	tRNA	CCTTCGAACCGGATTCGAACCAGTGACCTATGGATAACCGTACTTCCACTACAGTCCACCGCTCTACCAACTGAGCTATCGAAGG
phaw_30.0005888	8162-8235	RF00005	tRNA	Gene	tRNA	GCCGGTTAGCTCAGTCGGTTAGAGCGCCGTGCTAATAACGCGGATGTCGTGGGTTCGATCCCCATACTGGCCA
phaw_30.0005888	47803-47875	RF00005	tRNA	Gene	tRNA	GTGCTTACCTGGGCTTGAACCAGGGACCTTCTGTGTGTTAGACAGACGTGATAACCACTACACCATAAGCAC
phaw_30.0005978	17026-17098	RF00005	tRNA	Gene	tRNA	CCCGGATGGCTCAGTCGGTAGAGCATCAGGCTTTTAACCTGAGGGTCCAGGGTTCGAGTCCCTGTTCGGGCG
phaw_30.0005978	17376-17448	RF00005	tRNA	Gene	tRNA	CCCGGATGGCTCAGTCGGTAGAGCATCAGGCTTTTAACCTGAGGGTCCAGGGTTCGAGTCCCTGTTCGGGCG
phaw_30.0005978	21775-21847	RF00005	tRNA	Gene	tRNA	CCCGGATGGCTCAGTCGGTAGAGCATCAGGCTTTTAACCTGAGGGTCCAGGGTTCGAGTCCCTGTTCGGGCG
phaw_30.0006055	116070-116141	RF00005	tRNA	Gene	tRNA	ACGCTGTGGCGTAATGGTAAAGTTCCCGTCTCTGGATCAGCAGCTCATGGGTTCTAATCCTATAAGCGTCA
phaw_30.0006075	145656-145729	RF00005	tRNA	Gene	tRNA	GCCCCCGGGTGGGCCCGAACCACCAACCTTTTGGTTAACAGCCGAACGTGCTAACCGATTGAGCCACGGAGGC
phaw_30.0006075	145742-145813	RF00005	tRNA	Gene	tRNA	GCGATGGCCGGGAACCGAATCCGGGTCAACTGCTTGGAAGGTAGCTATGCTCACCACTATACCACCATTGC
phaw_30.0006110	73550-73622	RF00005	tRNA	Gene	tRNA	GCCTTCAGGGAGAATCGAACTCCCGGCCTCTGGTTTACTAGACCAGCGCTCTAACCCCTGAGCTATGAAGGC
phaw_30.0006187	330936-331052	RF00005	tRNA	Gene	tRNA	GTCAGAAGTGGGATTCGAACCCACGCCCTCCTGAGAGGACCAGAACGCCCAATCTCTGCGATACAGAGAAGGTGATACCTTGAGTCTGGCGCCTTAGACCACTCGGCCATCCTGAC
phaw_30.0006235	119908-119977	RF00005	tRNA	Gene	tRNA	GGCCATTATGGGGATCGAGCCCACGACATCCGCGTTATCAGCACGGCGCTCTAACCGAGTGACCTAACC
phaw_30.0006256	51160-51231	RF00005	tRNA	Gene	tRNA	GCGATGGCCGGGAATCGAACCCGGGTCAACTGCTTGGAAGGCAGCTATGCTCACCACTATACCACCATCGC
phaw_30.0006256	51602-51673	RF00005	tRNA	Gene	tRNA	AGCAGAGCGTGGTTTCGATCCACGGACCTCTGGGTTATGGGCCCAGCACGCTTCCTCTGCGCCACTCTGCT
phaw_30.0006256	210979-211062	RF00005	tRNA	Gene	tRNA	CTTCGATAGCTCAGTTGGTAGAGCGGTGGACTGTAGGGGTTCCAGCTATCCATAGGTCACTGGTTCGAATCCGGTTCGAAGGA
phaw_30.0006289	81008-81079	RF00005	tRNA	Gene	tRNA	CCTCGGTAGTATAGTGGTGAGTATCCCCGCCTGTCACGCGGGAGACCGGGGTTCGATTCCCCGCCGGGGAG
phaw_30.0006289	91088-91159	RF00005	tRNA	Gene	tRNA	CCTCGGTAGTATAGTGGTGAGTATCCCCGCCTGTCACGCGGGAGACCGGGGTTCGATTCCCCGCCGGGGAG
phaw_30.0006289	94702-94774	RF00005	tRNA	Gene	tRNA	TTTCCGTAGTGTAGTGGTTATCACGTGCGCCTCACACGCGCAAGGTCCCCGGTTCGATCCCGGGCGGAAACA
phaw_30.0006289	99829-99900	RF00005	tRNA	Gene	tRNA	CCTCGGTAGTATAGTGGTGAGTATCCCCGCCTGTCACGCGGGAGACCGGGGTTGGATTCCCCGCCGGGGAG
phaw_30.0006289	103513-103585	RF00005	tRNA	Gene	tRNA	TTTCCGTAGTGTAGTGGTTATCACGTGCGCCTCACACGCGCAAGGTCCCCGGTTCGATCCCGGGCGGAAACA
phaw_30.0006289	103988-104059	RF00005	tRNA	Gene	tRNA	CCTCGGTAGTATAGTGGTGAGTATCCCCGCCTGTCACGCGGGAGACCGGGGTTCGATTCCCCGCCGGGGAG
phaw_30.0006289	115764-115836	RF00005	tRNA	Gene	tRNA	GCCCAACGTGGGGCTCGAACCCACGACCCCGAGATTAAGAGTCTCGTGCTCTACCGACTGAGCTAGCCGGGC
phaw_30.0006289	120797-120868	RF00005	tRNA	Gene	tRNA	CCTCGGTAGTATAGTGGTGAGTATCCCCGCCTGTCACGCGGGAGACCGGGGTTCGATTCCCCGCCGGGGAG
phaw_30.0006289	137720-137803	RF00005	tRNA	Gene	tRNA	GTCAGGAGTGGGATTCGAACCCACGCCTGGAGAACCAGACTGCGACCTGAACGCAGCGCCTTAGACCGCTCGGCCATCCTGAC
phaw_30.0006289	161594-161677	RF00005	tRNA	Gene	tRNA	TCAGGATGGCCGAGCGGTCTAAGGCGCTGCGTTCAGGTCGCAGTCTGGTTCTCCAGGCGTGGGTTCGAATCCCACTCCTGACA
phaw_30.0006289	162521-162604	RF00005	tRNA	Gene	tRNA	GTCAGGAGTGGGATTCGAACCCACGCCTGGAGAACCAGACTGCGACCTGAACGCAGCGCCTTAGACCGCTCGGCCATCCTGAC
phaw_30.0006289	176238-176321	RF00005	tRNA	Gene	tRNA	GTCAGCAATGGGACTCGAACCCACTCCTGGATAATCATATTGCGACAAGAACACAGCGCCTTAGACCGCTCGGCCACCCTGAT
phaw_30.0006289	176410-176493	RF00005	tRNA	Gene	tRNA	GTCAGGAGTGGGATTCGAACCCACGCCTGGAGATCCAGACTGCGACCTGAACGCAGCGCCTTAGACCGCTCGGCCATCCTGAC
phaw_30.0006289	176583-176666	RF00005	tRNA	Gene	tRNA	GTCAGGAGTGGGATTCGAACCCACGCCTGGAGAACCAGACTGCGACCTGAACGCAGCGCCTTAGACCGCTCGGCCATCCTGAC
phaw_30.0006343	37292-37365	RF00005	tRNA	Gene	tRNA	GGCCAGTATGGGGATCGAACCCACGACATCCGCGTTATTAGCACGGCGCTCTAACCGACTGAGCTAACCGGCC
phaw_30.0006343	39047-39120	RF00005	tRNA	Gene	tRNA	GGCCAGTATGGGGATCGAACCCACGACATCCGCGTTATTAGCACGGCGCTCTAACCGACTGAGCTAACCGGCC
phaw_30.0006384	135341-135411	RF00005	tRNA	Gene	tRNA	GGCACTGTGGACTCGAACCTGCAATCTTCGGATCCGAAGTCCGACGCCTTATCCATTAGGCCACACGGTC
phaw_30.0006474	41500-41572	RF00005	tRNA	Gene	tRNA	GGCCCATATGAGGATCGAACCCACGATATCCGCGTTATCAGCACGGCGCTGTAACCGATGAGCTAACAAGCG
phaw_30.0006587	15458-15542	RF00005	tRNA	Gene	tRNA	AGCCTGTACAAGGATCGAACTTGTGACCTCCAGCTTGTTTTCAGAAAGAACCCTGCTGGTGCTCTGCCACTGAGCTAACAGGCA
phaw_30.0006587	21719-21803	RF00005	tRNA	Gene	tRNA	AGCCTGTGCAAGGGTCGAACTTGCGACCGCCAGCTTGTTTTCAACAAGAACTCTGCTGGTGCTCTGCCACTGAGCTAACAGGCA
phaw_30.0006611	105745-105817	RF00005	tRNA	Gene	tRNA	GGTCCTGCCAAGGATCGAACTCGGGCCTATCTCACTTGAAATCCGATGCGCTAACTAGTACACCACAGGACC
phaw_30.0006714	85660-85730	RF00005	tRNA	Gene	tRNA	CATCGGTGGTTCAGTGGTAGAATTCTCGCCTGCCACGCGGGAGGCCCGGGTTCGATTCCCGGCCGATGCA
phaw_30.0006714	93609-93681	RF00005	tRNA	Gene	tRNA	CCTCTATAGCTCAGTGGCTAGAGCACTGGTCTTGTAAACCAGGGGTCGGGAGTTCGATCCTCCCTGGAGGCA
phaw_30.0006714	109581-109664	RF00005	tRNA	Gene	tRNA	TCAGGATGGCCGAGCGGTCTAAGGCGCTGCGTTCAGGTCGCAGTCTGGTTCTCCAGGCGTGGGTTCGAATCCCACTCCTGACA
phaw_30.0006714	125178-125293	RF00005	tRNA	Gene	tRNA	GTCAGAAGTGGGATTCGAACCCACGCCCTCCTGAGAGGACCAGAACGCCCAATATCTCTCGGAGAGAGACAAGTTGCCTTGAGTCTGGCGCCTTAGACCACTCGGCCATCCTGAC
phaw_30.0006719	52820-52892	RF00005	tRNA	Gene	tRNA	GCCTTCAGGGAGAATCGAACTCCCGACCTCTGGTTTACTAGACCAGCGCTCTAACCCCTGAGCTATGAAGGC
phaw_30.0006719	113202-113274	RF00005	tRNA	Gene	tRNA	ACCTCCGGCGGGACTCGAACCCGCAATCCCTGGCTTAGGAGGCCAATGCCTTATCCATTAGGCCACGGAGGC
phaw_30.0006726	7143-7214	RF00005	tRNA	Gene	tRNA	TCCCCGGCGGGGAATCGAACCCCGGTCTCCCGCGTGACAGGCGGGGATACTCACCACTATACTACCGAGGA
phaw_30.0006726	26249-26320	RF00005	tRNA	Gene	tRNA	GCCGTGACCAGGATTCGAACCTGGGTTATTGCGGCCACAACGCAATGTACTAACCACTATACGATCACGGC
phaw_30.0006726	31139-31211	RF00005	tRNA	Gene	tRNA	CCTCGGTAGCGCAGTAGGCAGCGCGTCAGTCTCATAATCTGAAGGTCGTGAGTTCGATCCTCACTCGGGGCA
phaw_30.0006726	34944-35016	RF00005	tRNA	Gene	tRNA	GCCCAACGTGGGGCTCGAACCCACGACCCCGAGATTAAGAGTCTCGTGCTCTACCGACTGAGCTAGCCGGGC
phaw_30.0006726	70586-70670	RF00005	tRNA	Gene	tRNA	CCTTCGAACCGGATTCGAACCAGTGACCTATGGATAGCTGAGAACCACTACAGTCCACCGCTCTACCAACTGAGCTATCGAAGG
phaw_30.0006847	9748-9820	RF00005	tRNA	Gene	tRNA	GCCTTCAGGGAGAATCGAACTCCCGGCCTCTGGTTTACTAGACCAGCGCTCTAACCCCTGAGCTATGAAGGC
phaw_30.0006847	139789-139861	RF00005	tRNA	Gene	tRNA	GCCTTCAGGGAGAATCGAACTCCCGGCCTCTGGTTTACTAGACCAGCGCTCTAACCCCTGAGCTATGAAGGC
phaw_30.0006847	200450-200522	RF00005	tRNA	Gene	tRNA	CCTTCATAGCTCAGGAGTTAGAGCGCTGGTCTAGTAAACCAGAGGCCGGGAGTTCGATTCTCCCTGAAGGCA
phaw_30.0006847	202998-203070	RF00005	tRNA	Gene	tRNA	CCTTCATAGCTCAGGGGTTAGAGCGCTGGTCTAGTAAACCAGAGGCCGGGAGTTCGATTCTCCCTGAAGGCA
phaw_30.0006912	129723-129796	RF00005	tRNA	Gene	tRNA	GGCCAGTATGGGGATCGAACCCACGACATCCGCGTTATCAGCACGGCGCTCTAACCAACTGAGCTAACCGGCC
phaw_30.0006967	128031-128103	RF00005	tRNA	Gene	tRNA	TGCTTATGGTGTAGTGGTTATCACGTCTGTCTAACACACAGAAGGTCCCTGGTTCGAGCCCAGGTAAGCACA
phaw_30.0006973	265725-265797	RF00005	tRNA	Gene	tRNA	CCCGGCTAGCTCAGTCGGTAGAGCACGAGACTCTTAATCCCGGGGTCGTGGGTTCGAGCCCCACGTTGGGCG
phaw_30.0006973	265961-266033	RF00005	tRNA	Gene	tRNA	GCCCAACGTGGGGCTCGAACCCACGACCCCGAGATTAAGAGTCTCGTGCTCTACCGACTGAGCTAGCCGGGC
phaw_30.0007102	158506-158589	RF00005	tRNA	Gene	tRNA	TCAGGTTGGCCGAGTGGTCTAAGGCGTCAGATTTAAGCTCTGATACTCTCAGGAGTGCGTGGGTTCGAACCCCACACCTGACA
phaw_30.0007214	133509-133590	RF00005	tRNA	Gene	tRNA	GTAGCGTGGCCGAGCGGTCTAAGGCGCTGGTTTAAGGCACCAGTCTCTTCGGAGGCGTGGGTTCGAATCCCACCGCTGCCA
phaw_30.0007239	13929-14001	RF00005	tRNA	Gene	tRNA	CCTCGGTAGCGCAGTAGGCAGCGCGTCAGTCTCATAATCTGAAGGTCGTGAGTTCGATCCTCACTCGGGGCA
phaw_30.0007320	78583-78655	RF00005	tRNA	Gene	tRNA	CCCGGCTAGCTCAGTCGGTAGAGCACGAGACTCTTAATCTCGGGGTCGTGGGTTCGAGCCCCACGTTGGGCG
phaw_30.0007333	41086-41157	RF00005	tRNA	Gene	tRNA	TCCCGTGCCGGGAATCGAACCCGGGCCTCGCGGGTGAGAGCCGCGTATCCTAGCCACTAGACCACACGGGA
phaw_30.0007351	8034-8105	RF00005	tRNA	Gene	tRNA	TCCCGTACCGGGAATTGAACCCGGGCCTCGCGGGTGAGAGCCGCGTATCCTAGCCACTAGACCACACGGGA
phaw_30.0007351	8829-8900	RF00005	tRNA	Gene	tRNA	TCCCGTGCCGGGAATTGAACCCGGGCCTCGCGGGTGAGAGCCGCGTATCCTAGCCACTAGACCACACGGGA
phaw_30.0007351	9814-9885	RF00005	tRNA	Gene	tRNA	TCCCGTGCCGGGAATTGAACCCGGGCCTCGCGGGTGAGAGCCGCGTATCCTAGCCACTAGACCACACGGGA
phaw_30.0007351	10554-10625	RF00005	tRNA	Gene	tRNA	TCCTGTGCCAGGAATTGAACCCGGGCCTCACGGGTGAGAGCCGCGTATCCTAGTCGCTAGACCACTCGGGA
phaw_30.0007351	12335-12406	RF00005	tRNA	Gene	tRNA	TCCCGTGCCGGGAATTGAACCCGGGCCTCGCGGGTGAGAGCCGCGTATCCTAGCCACTAGACTACACGGGA
phaw_30.0007351	14531-14602	RF00005	tRNA	Gene	tRNA	TCCCGTGCCGGGAATTGAACCCGGGCCTCGCGGGTGAGAGCCGCGTATCCTAGCCACTAGACCACACGGGA
phaw_30.0007351	25990-26061	RF00005	tRNA	Gene	tRNA	TCCCGTGCCGGGAATTGAACCCGGGCCTCGCGGGTGAGAGCCGCGTATCCTAGCCACTAGACCACACGGGA
phaw_30.0007351	27046-27117	RF00005	tRNA	Gene	tRNA	TCCCGTGCCGGGAATTAAACCCGGGCCTCGCGGGTGAGAACCGCGTATCCTAGCCACTAGACCACACGGGA
phaw_30.0007351	28159-28230	RF00005	tRNA	Gene	tRNA	TCCCGTGCCGGGAATTGAACCCGGGCCTCGCGGGTGAGAGCCGCGTATCCTAGCCACTAGACCACACGGGA
phaw_30.0007351	75615-75686	RF00005	tRNA	Gene	tRNA	CCCGTGTGGTCTAGTGGCTAGGATACGCGGCTCTCACCCGCGAGGCCCGGGTTCAATTCCCGGCACGGGAA
phaw_30.0007351	77485-77556	RF00005	tRNA	Gene	tRNA	GCCGTGTGGTCTAGTGGCTAGGCTACGCGGCTCTCACCCGCGAGGCCCGGGTTCAATTCCCGGCACGGGAA
phaw_30.0007351	79306-79377	RF00005	tRNA	Gene	tRNA	CCCGTGTGGTCTAGTGGCTAGGATACGCGGCTCTCACCCGCGAGGCCCGGGTTCAATTCCCGGCACGGGAA
phaw_30.0007351	91899-91970	RF00005	tRNA	Gene	tRNA	TCCCGTGCCGGGAATTGAACCCGGGCCTCGCGGGTGAGAGCCGCGTATCCTAGCCACTAGACCACACGGGA
phaw_30.0007363	94538-94609	RF00005	tRNA	Gene	tRNA	GTTCTATGGTGTAATGGTTAGCACTCTGGACTTTGAATCCAGCGATCCGAGTTCGAGTCTCGGTAGAACCT
phaw_30.0007418	95862-95922	RF00005	tRNA	Gene	tRNA	GTAGTATAGTGGTGAGAATCCCCGCATGTCACGCGGGAGACCGGGGTTCGATTCCCCGCC
phaw_30.0007452	18530-18601	RF00005	tRNA	Gene	tRNA	CGATGGTGGTATAGTGGTGAGCATAGCTGCCTTCCAAGCAGTTGACCCGGGTTCGATTCCCGGCCATCGCA
phaw_30.0007452	22063-22135	RF00005	tRNA	Gene	tRNA	CCTAGATAGCTCAGTTGGGAGAGCGTTAGACTGAAGATCTAAAGGTCCCCGGTTCGATCCCGGGTCTGGGCA
phaw_30.0007452	25445-25517	RF00005	tRNA	Gene	tRNA	CCTAGATAGCTCAGTTGGGAGAGCGTTAGACTGAAGATCTAAAGGTCCCCGGTTCGATCCCGGGTCTGGGCA
phaw_30.0007452	37870-37942	RF00005	tRNA	Gene	tRNA	CCTAGATAGCTCAGTTGGGAGAGCGTTAGACTGAAGATCTAAAGGTCCCCGGTTCGATCCCGGGTCTGGGCA
phaw_30.0007491	102188-102260	RF00005	tRNA	Gene	tRNA	CCTAGATAGCTCAGTTGGGAGAGCGTTAGACTGAAGATCTAAAGGTCCCCGGTTCGATCCCGGGTCTGGGCA
phaw_30.0007534	39249-39321	RF00005	tRNA	Gene	tRNA	CCCGGATGGCTCAGTCGGTAGAGCATCAGGCTTTTAACCTGAGGGTCCAGGGTTCGAGTCCCTGTTCGGGCG
phaw_30.0007534	74694-74765	RF00005	tRNA	Gene	tRNA	GGTTCTACCGAGACTCGAACTCGGATTGTTGGATTCAGAGTCCAAAGTGCTAACCATTACACCATAGAACC
phaw_30.0007534	95767-95839	RF00005	tRNA	Gene	tRNA	GGAGCTGCGGGGCATCGATCCCCGTACCTCTCGCATGCTAAGCGAGCGCTCTACCATTTGAGCTACAGCCCC
phaw_30.0007560	62819-62890	RF00005	tRNA	Gene	tRNA	GCAGAGTGGCGCAGAGGAAGCGTGCTGGGCCCATAACCCAGAGGTCCGTGGATCGAAACCACGCTCTGCTA
phaw_30.0007560	63264-63335	RF00005	tRNA	Gene	tRNA	CGATGGTGGTATAGTGGTGAGCATAGCTGCCTTCCAAGCAGTTGACCCGGGTTCGATTCCCGGCCATCGCA
phaw_30.0007603	27473-27545	RF00005	tRNA	Gene	tRNA	GACCGTGACAGGACTCGAACCTGCAATCTTCGGATCCGAAGTCCGACGCCTTATCCATTAGGCCACACGGCC
phaw_30.0007621	92243-92314	RF00005	tRNA	Gene	tRNA	GGGCCCAATGGGTATCGAACGTGGTTCATCGGATTCGAAGTCCGATGTGTTAACCACTACACCACGGGCCC
phaw_30.0007628	21547-21618	RF00005	tRNA	Gene	tRNA	GGTCCTACCGAGACTCGAACTCGGATCGCTGGATTCAAAGTCCAAAGTGCTAACCATTACACCATAGGACC
phaw_30.0007899	10002-10083	RF00005	tRNA	Gene	tRNA	GACGAGGATGAGATTCGAACTCACGCACGGAGACCGTATTGGATTAGCAGTCCAACGCCTTAACCACTCGGCCACCTCGCC
phaw_30.0008016	6919-7002	RF00005	tRNA	Gene	tRNA	GTCAGGTGTGGGGTTCGAACCCACGCACTCTTGCGAGTATCAGAGCTTAAATCTGACGCCTTAGACCACTCGGCCAACCTGAC
phaw_30.0008104	30176-30247	RF00005	tRNA	Gene	tRNA	GGCTCGTCCGGGATTTGAACCCGGGACCTCTCGCACCCTAAGCGAGAATCATACCCCTAGACCAACGAGCC
phaw_30.0008104	44835-44916	RF00005	tRNA	Gene	tRNA	GCTGTAGACAGGATTCGAACCTGTGCGGGCAGAGCCCAATGGATTTCTAGTCCATCTCCTTAACCACTCGGACACCACAGC
phaw_30.0008104	45495-45566	RF00005	tRNA	Gene	tRNA	GGGGTGTAGCTCAGTGGTAGAGCATTCGACTGCAGATCGAGAGGTCCCCGGTTCAAACCCGGGCGCCCCCT
phaw_30.0008104	47227-47298	RF00005	tRNA	Gene	tRNA	GGGGTGTAGCTCAGTGGTAGAGCATTCGACTGCAGATCGAGAGGTCCCCGGTTCAAACCCGGGCGCCCCCT
phaw_30.0008104	103441-103512	RF00005	tRNA	Gene	tRNA	CCCATGTGGTCTAGTGGCTAGGATACCTGGCTTTCACCCAGGAGGCCCGGGTTCGATTCCCGGCATGGGAA
phaw_30.0008112	30177-30292	RF00005	tRNA	Gene	tRNA	TCAGGATGGCCGAGTGGTCTAAGGCGCCAGACTCAAGGCAACTTGTCTCTCACTGAGAGATATTGGGCGTTCTGGTCCTCTCAGGAGGGCGTGGGTTCGAATCCCACTTCTGACA
phaw_30.0008158	29110-29181	RF00005	tRNA	Gene	tRNA	TCCCCGGCGGGGAATCGAACCCCGGTCTCCCGCGTGACAGGCGGGGATACTCACCACTATACTACCGAGGA
phaw_30.0008158	36127-36197	RF00005	tRNA	Gene	tRNA	GCATCGGCCGGGAATCGAACCCGGGCCTCCCGCGTGGCAGGCGAGAATTCTACCACTGAACCACCGATGC
phaw_30.0008182	44277-44348	RF00005	tRNA	Gene	tRNA	TCCCCGGCGGGGAATCGAACCCCGGTCTCCCGCGTGACAGGCGGGGATACTCACCACTATACTACCGAGGA
phaw_30.0008220	108522-108594	RF00005	tRNA	Gene	tRNA	GTGCTTACCTGGGCTCGAACCAGGGACCTTCTGTGTGTTAGACAGACGTGATAACCACTACACCATAAGCAC
phaw_30.0008249	64506-64578	RF00005	tRNA	Gene	tRNA	CCTCCATAGCTCAGTGGTTAGAGCACTGGTCTTGTAAACCAGGGGTCGGGAGTTCAATTCTCCCTGGGGGCA
phaw_30.0008329	65414-65486	RF00005	tRNA	Gene	tRNA	CCCGGCTAGCTCAGTCGGTAGAGCACGAGACTCTTAATCTCGGGGTCGTGGGTTCGAGCCCCACGTTGGGCG
phaw_30.0008364	14734-14805	RF00005	tRNA	Gene	tRNA	GCCCCATGGCGCAATGGTAGCGCGTCTGACTCCAGATCAGAAGGTTGGGTGTTCGAGTCACTCTGGGGTCA
phaw_30.0008365	32538-32594	RF00005	tRNA	Gene	tRNA	GCGTGGTTGATAACGCGTCGCGCTGATAACGCGAATGTCGTGGGTTCGTTCCCCAT
phaw_30.0008369	31125-31198	RF00005	tRNA	Gene	tRNA	GGCCAGTATGGTGATGGAACCCACGACATCCGCGTTATCCGCACGGCGCTCTAACCAACTGAGCTAACCAGCC
phaw_30.0008372	80179-80250	RF00005	tRNA	Gene	tRNA	GTATCATGGTGCAGTGATTAGCACATGGAACATCAAATTCGATAACCCGGGTTCGAATTCCGGTATGGCCT
phaw_30.0008405	53097-53168	RF00005	tRNA	Gene	tRNA	GGTCCTACCGAGACTCGAACTCGGATCGCTGGATTCAAAGTCCAGAGTGCTAACCATTACACCATAGGACC
phaw_30.0008450	116407-116478	RF00005	tRNA	Gene	tRNA	AGCAGAGCGTGGTTTCGATCCACGGACCTCTGGGTTATGGGCCCAGCACGCTTCCTCTGCGCCACTCTGCT
phaw_30.0008450	135625-135697	RF00005	tRNA	Gene	tRNA	CCTAGATAGCTCAGTTGGGAGAGCGTTAGACTGAAGATCTAAAGGTCCCCGGTTCGATCCCGGGTCTGGGCA
phaw_30.0008450	135799-135870	RF00005	tRNA	Gene	tRNA	AGCAGAGCGTGGTTTCGATCCACGGACCTCTGGGTTATGGGCCCAGCACGCTTCCGCTGCGCCACTCTGCT
phaw_30.0008450	148213-148285	RF00005	tRNA	Gene	tRNA	CCTAGATAGCTCAGTTGGGAGAGCGTTAGACTGAAGATCTAAAGGTCCCCGGTTCCATCCCGGGTCTGGGCA
phaw_30.0008450	150236-150307	RF00005	tRNA	Gene	tRNA	AGCAGAGCGTGGTTTCGATCCACGGACCTCTGGGTTATGGGCCCAGCACGCTTCCTCTGCGCCACTCTGCT
phaw_30.0008450	151301-151372	RF00005	tRNA	Gene	tRNA	CGATGGTGGTATAGTGGTGAGCATAGCTGCCTTCCAAGCAGTTGACCCGGGTTCGATTCCCGGCCATCGCA
phaw_30.0008450	158379-158451	RF00005	tRNA	Gene	tRNA	GCCCAGACCCGGGATCGAACCGGGGACCTTTAGATCTTCAGTCTAACGCCCTCCCAACTGAGCTATCTAGGC
phaw_30.0008450	160543-160614	RF00005	tRNA	Gene	tRNA	CGATGGTGGTATAGTGGTGAGCATAGCTGCCTTCCAAGCAGTTGACCCGGGTTCGATTCCCGGCCATCGCA
phaw_30.0008450	168820-168891	RF00005	tRNA	Gene	tRNA	GCAGAGTGGCGCAGAGGAAGCGTGCTGGGCCCATAACCCAGAGGTCCGTGGATCGAAACCACGCTCTGCTA
phaw_30.0008450	172788-172859	RF00005	tRNA	Gene	tRNA	ACTGAGTGGCGCAGAGGAAGCGTGCTGGGCCCATAACCCAGAGGTCCGTGGATCGAAACCACGCTCTGCTA
phaw_30.0008450	174494-174565	RF00005	tRNA	Gene	tRNA	AGCAGAGCGTGGTTTCGATCCACGGACCTCTGGGTTATGGGCCCAGCACGCTTCCTCTGCGCCACTCTGCT
phaw_30.0008450	175713-175784	RF00005	tRNA	Gene	tRNA	GCGATGGCCGGGAATCGAACCCGGGTCAACTGCTTGGAAGGCAGCTATGCTTACCACTATACCACCATCGC
phaw_30.0008478	100565-100680	RF00005	tRNA	Gene	tRNA	TCAGGATGGCCGAGTGGTCTAAGGCGCCAGACTCAAGGCAACTTGTCTCTGGTAAAGAGACATTGGGCGTTCTGGTCCTCTCAGGAGGGCGTGGGTTCGAATCCCACTTCTGACA
phaw_30.0008478	102713-102828	RF00005	tRNA	Gene	tRNA	GTCAGAAGTGGGATTCGAACCCACGCCCTCCTGAGAGGACCAGAACGCCCATCGTCTCTTAATCAGAGACAAGTTGCCTTGAGTCTGGCGCCTTAGACCACTCGGCCATCCTGAC
phaw_30.0008486	84244-84316	RF00005	tRNA	Gene	tRNA	ACACGTACGGGGACTGCAACCCTAGCCCTCAGGTTAAAAAGCCTGATGCTCTACCATCTGAGCCATCCGGGC
phaw_30.0008486	85451-85523	RF00005	tRNA	Gene	tRNA	GCCCGAACAGGGACTCGAACCCTGGACCCTCAGGTTAAAAGCCTGATGCTCTACCGACTGAGCCATCCGGGC
phaw_30.0008486	86635-86707	RF00005	tRNA	Gene	tRNA	GCCCGAACAGGGACTCGAACCCTGGACCCTCAGGTTAAAAGCCTGATGCTCTACCGACTGAGCCATCCGGGC
phaw_30.0008486	86880-86952	RF00005	tRNA	Gene	tRNA	GCCCGAACAGGGACTCGAACCCTGGACCCTCAGGTTAAAAGCCTGATGCTCTACCGACTGAGCCATCCGGGC
phaw_30.0008579	45-116	RF00005	tRNA	Gene	tRNA	GACCCCAGAGTGACTCGAACACCCAACCTTCTGATCTGGAGTCAGACGCGCTACCATTGCGCCATAGGGCC
phaw_30.0008688	81823-81895	RF00005	tRNA	Gene	tRNA	CTCTCGTAGTGTAGTGGTTATCACGTCTGCTTTACACGCAGAAGGTCNNNNNNNNNNNCCCTGGCGGGAGCA
phaw_30.0008713	123572-123645	RF00005	tRNA	Gene	tRNA	GGCCAGTATGAGGATCGAACCAACGACATTCGCGTTATCAGCACGGCGCTCTAACCGACTGAGCTAACCGGCC
phaw_30.0008750	39886-39957	RF00005	tRNA	Gene	tRNA	GCGCCGCCCGGGAATCGAACCCGACTCGCAAGATTGGGAATCTTGCATGCTAACCACTACACCAGCGGCGC
phaw_30.0008784	96992-97063	RF00005	tRNA	Gene	tRNA	AGCCTGTGCAGGACTCGAACCTGCGACAACCCGTAAATCGGTCGGGTGCTCTACCGCTGAGCTAACAGGCA
phaw_30.0008784	111883-111955	RF00005	tRNA	Gene	tRNA	AGCCTGTGCAGGAATCGAACCTGCGACAACCCGTTAATCCGTCGGGTGCTCTAACCACTGAGCTAACAGGCA
phaw_30.0008913	152605-152720	RF00005	tRNA	Gene	tRNA	TCAGGATGGCCGAGTGGTCTAAGGCGCCAGACTCAAGGCAACTTCTCTCGCTCCGAGAGACAATGGGCGTTCTGGTCCTCTCAGGAGGGCGTGGGTTCGAATCCCACTTCTGACA
phaw_30.0008932	26450-26523	RF00005	tRNA	Gene	tRNA	GCCGGTTAGCTCAGTCGGTTAGAGCGCCGTGCTAATAACGCGGATGTCGTGGGTTCGATCCCCATACTGGCCA
phaw_30.0008932	28179-28252	RF00005	tRNA	Gene	tRNA	GCCGGTTAGCTCAGTCGGTTAGAGCGCCGTGCTAATAACGCGGATGTCGTGGGTTCGATCCCCATACTGGCCA
phaw_30.0008938	8210-8283	RF00005	tRNA	Gene	tRNA	ACCGGTTAGCTCAGTCGGTTAGAGCGCCGTGCTGATAACGCGGATGTCGTGGGTTCGATCCCCATACTGGCCA
phaw_30.0008942	82038-82110	RF00005	tRNA	Gene	tRNA	ATCTCCAACGGGATTCGAACCCGCGGCCTCTGGATTAGAAGTCCAGCGCGCTATCCACTGCGCCATGGAGAC
phaw_30.0008953	33934-34005	RF00005	tRNA	Gene	tRNA	GCCGTGACCAGGATTCGAACCTGGGTTATTGCGGCCACAACGCAATGTACTAACCACTATACGATCACGGC
phaw_30.0008961	68910-68982	RF00005	tRNA	Gene	tRNA	GCCTTCAGGGAGAATCGAACTCCCGGCCTCTGGTTTACTAGACCAGCGCTCTAACCCCTGAGCTATGAAGGC
phaw_30.0009109	69639-69722	RF00005	tRNA	Gene	tRNA	CTTCGATAGCTCAGTTGGTAGAGCGGTGGACTGTAGAGGCTTCAGCTATCCATAGGTCACTGGTTCGAATCCGGTTCGAAGGA
phaw_30.0009109	70301-70384	RF00005	tRNA	Gene	tRNA	CTTCGATAGCTCAGTTGGTAGAGCGGTGGACTGTAGGGGTTCCAGCTATCCATAGGTCACTGGTTCGAATCCGGTTCGAAGGA
phaw_30.0009137	19687-19758	RF00005	tRNA	Gene	tRNA	GGCTTGACCGGGATTTGAACCCGGGACCTCTCGCACCCTAAGCGAGAATCATACCCCTAGACCATCAAGCC
phaw_30.0009137	26469-26540	RF00005	tRNA	Gene	tRNA	GGCTTGACCGAGATTTGAACCCGGGACCTCTCGCACCCTAAGCGAGAATCATACCCCTAGACCATCAAGCC
phaw_30.0009137	30361-30432	RF00005	tRNA	Gene	tRNA	GCTTGATGGTCTAGGGGTATGATTCTCGCTTAGGGTGCGAGAGGTCCCGGGTTCAAATCCCGGTCAAGCCC
phaw_30.0009137	30611-30682	RF00005	tRNA	Gene	tRNA	GGCCTGACCGGGATTTGAACCCGGGACCTCTCGCACCCAAAGCGAGAATCATACCCCTAGACCATCAGGCC
phaw_30.0009137	36601-36673	RF00005	tRNA	Gene	tRNA	TTTCCGTAGTGTAGTGGTTATCACGTGCGCCTCACACGCGCAAGGTCCCCGGTTCGATCCCGGGCGGAAACA
phaw_30.0009137	39128-39199	RF00005	tRNA	Gene	tRNA	CTTCGGTAGTATAGTGGTGAGTATCCCCGCCTGTCACGCGGGAGACCGGGGTTCGATTCCCCGCCGGGGAG
phaw_30.0009137	45251-45323	RF00005	tRNA	Gene	tRNA	TTTCCGTAGTGTAGTGGTTATCACGTGCGCCTCACACGCGCAAGGTCCCCGGTTCGATCCCGGGCGGAAACA
phaw_30.0009137	48161-48217	RF00005	tRNA	Gene	tRNA	AGTATAGTGGTGAGTATCCCCGCCTGTCACGCGTGAGACCGGGGTTCGATTCCCCG
phaw_30.0009137	62588-62659	RF00005	tRNA	Gene	tRNA	GGTTCTACCGAGACTCGAACTCGGATCGCTGGATTCAAAGTCCAGAGTGCTAACCATTACACCATAGAACC
phaw_30.0009137	65679-65750	RF00005	tRNA	Gene	tRNA	GGCTTGACCGGGATTTGAACCCGGGACCTCTCGCACCCAAAGCGAGAATCATACCCCTAGACCATCAAGCC
phaw_30.0009137	66345-66415	RF00005	tRNA	Gene	tRNA	GCATCCGCCGGGAATCGAACCCGGGCCTCCCGCGTGGCAGGCGAGAATTCTACCACTGAACCACCGATGC
phaw_30.0009137	70031-70089	RF00005	tRNA	Gene	tRNA	GGGGGGGTCGAACCCCAGCCTACCGCGTAACAGGCGGGGATACTCACCACTATACTAC
phaw_30.0009137	74478-74550	RF00005	tRNA	Gene	tRNA	GTTTCCGCCCGGGATCGAACCGGGGACCTTGCGCGTGTGAGGCGCACGTGATAACCACTACACTACGGAAAC
phaw_30.0009137	78461-78532	RF00005	tRNA	Gene	tRNA	TCCCCGGCGGGAAATCGAACCCCGGTCTCACGCGTGACAGGCGGAGATACTCACCACTATACTACCGAGGA
phaw_30.0009137	78897-78968	RF00005	tRNA	Gene	tRNA	TCCCCGGCGGGGAATCGAACCCCGGTCTCCCGCGTGACAGGCGGGGATACTCACCACTATACTACCGAGGA
phaw_30.0009137	87771-87841	RF00005	tRNA	Gene	tRNA	GCATCGGCCGGGAATCGAACCCGGGCCTCCCGCGTGGCAGGCGAGAATTCTACCACTGAACCACCGATGC
phaw_30.0009137	88111-88182	RF00005	tRNA	Gene	tRNA	GCATCGGCCGGGAATCGATACCGGGGCCTCCCGCGTGGCAGGCGAGAATTCTACGAGTGAACCGCCGAGGC
phaw_30.0009137	89363-89433	RF00005	tRNA	Gene	tRNA	GCATCGGCCGGGAATCGAACCCGGGCCTCCCGCGTGGCAGGCGAGAATTCTACCACTGAACCACCGATGC
phaw_30.0009137	89636-89706	RF00005	tRNA	Gene	tRNA	GAATCGGCCGGGAATCGAACCCGGGCCTCCCGCGTGGCAGGCGAGAATTCTACCACTGAACCACCGATAC
phaw_30.0009137	92252-92322	RF00005	tRNA	Gene	tRNA	GCATCGGCCGGGAATCGAACCCGGGCCTCCCGCGTGGCAGGCGAGAATTCTACCACTGAACCACCGATGC
phaw_30.0009157	85087-85170	RF00005	tRNA	Gene	tRNA	GTCAGGTGTGGGGTTCGAACCCACGCACTCTTGCGAGTATCAGAGCTTAAATCTGACGCCTTAGACCACTCGGCCAACCTGAC
phaw_30.0009196	21727-21810	RF00005	tRNA	Gene	tRNA	GTCAGGAGTGGGATTCGAACCCACGCCTGGAGAACCAGACTGCGACCTGAACGCAGCGCCTTAGACCGCTCGGCCATCCTGAC
phaw_30.0009196	40049-40119	RF00005	tRNA	Gene	tRNA	GCATCGGCCGGGAATCGAACCCGGGCCTCCCGCGTGGCAGGCGAGAATTCTACCACTGAACCACCGATGC
phaw_30.0009281	88346-88418	RF00005	tRNA	Gene	tRNA	GACCGTGACGGGACTCGAACCTGCAATCTTCGGATCCGAAGTCCGACGCCTTATCCATTAGGCCACACGGTC
phaw_30.0009323	94181-94253	RF00005	tRNA	Gene	tRNA	CCTCCGTGGCCTAATGGATAAGGCATTGGCCTCCTAAGCCAGGGATTGCGGGTTCGAGTCCCGCCGGAGGTT
phaw_30.0009337	143376-143447	RF00005	tRNA	Gene	tRNA	TCCCATGCCGGGAATCGAACCCGGGCCTCCTGGGTGAAAGCCAGGTATCCTAGCCACTAGACCACATGGGA
phaw_30.0009349	64027-64099	RF00005	tRNA	Gene	tRNA	GCCCCCAGGGAGAATTGAACTCCCGACCCCTGGTTTACAAGACCAGTGCTCTAACCACTGAGCTATGGAGGC
phaw_30.0009624	756-827	RF00005	tRNA	Gene	tRNA	TCCCGTGCCGGGAATCGAACCCGGGCCTCGCGGGTGAGAGCCGCGTATCCTAGCCACTAGACTACACGGGA
phaw_30.0009866	20140-20215	RF00005	tRNA	Gene	tRNA	GTGAGGCTCGAACTCACAACCTCGGCATAGCTCAATACTGTCGTATAAGTACCGCGCGCTAACCGATTGCGCCAC
phaw_30.0009999	31703-31776	RF00005	tRNA	Gene	tRNA	GCCGGTTAGCTCAGTTGGTTAGAGCGCCGTGCTGATAACGCGAATGTCGTGGGTTCGTTCCCCATACTGGCCA
phaw_30.0010024	70289-70362	RF00005	tRNA	Gene	tRNA	GCCCCTGGGTGGGCTCGAACCACCAACCTTTCGGTTAACAGCCGAACGCGCTAACCGATTGCGCCACAGAGGC
phaw_30.0010024	96017-96087	RF00005	tRNA	Gene	tRNA	CATTGGTGGTTCAGTGGTAGAATTCTCGCCTGCCACGCGGGAGGCCCGGGTTCGATTCCCGGCCAATGCA
phaw_30.0010024	145619-145704	RF00005	tRNA	Gene	tRNA	CCTTCGAACCGGATTCGAACCAGTGACCTATGGATAACCGTTATTCCTCTACAGTCCACCGCTCTACCAACTGAGCTATCGAAGG
phaw_30.0010024	147044-147116	RF00005	tRNA	Gene	tRNA	GCCTTGTGGCGCAATGGATAACGCGTCCGCCTACGGAGCGGAAGATTCCAGGTTCGACCCCTGGCAAGGTCG
phaw_30.0010024	147431-147512	RF00005	tRNA	Gene	tRNA	GCTGTAGACAGGATTCGAACCTGTGCGGGCAGAGCCCAATGGATTTCTAGTCCATCTCCTTAACCACTCGGACACCACAGC
phaw_30.0010024	148330-148411	RF00005	tRNA	Gene	tRNA	CTGTGGTGTCCGAGTGGTTAAGGAGATGGACTAGAAATCCATTGGGCTCTGCCCGCACAGGTTCGAATCCTGTCTACAGCG
phaw_30.0010024	160818-160901	RF00005	tRNA	Gene	tRNA	GTCAGGAGTGGGATTCGAACCCACGCCTGGAGAACCAGACTGCGACCTGAACGCAGCGCCTTAGACCGCTCGGCCATCCTGAC
phaw_30.0010024	166250-166322	RF00005	tRNA	Gene	tRNA	GCCTTGTGGCGCAATGGATAACGCGTCCGCCTACGGAGCGGAAGATTCCAGGTTCGACCCCTGGCAAGGTCG
phaw_30.0010170	855-926	RF00005	tRNA	Gene	tRNA	CCTCGGTAGTATAGTGGTGAGTATCCCCGCCTGTCACGCGGGAGACCGGGGTTCGATTCCCCGCCGGGGAG
phaw_30.0010170	7976-8046	RF00005	tRNA	Gene	tRNA	GCATCGGCCGGGAATCGAACCCGGGCCTCCCGCGTGGCAGGCGAGAATTCTACCACTGAACCACCGATGC
phaw_30.0010170	13894-13965	RF00005	tRNA	Gene	tRNA	GCCTTCAGAGAGAATCGAACTCTCGACCCCTAGTTTACGAGACTAGTGCTCTGCCCCTGAGCTATGAAGGC
phaw_30.0010170	41539-41611	RF00005	tRNA	Gene	tRNA	GACCTTGCCAGGGGTCGAACCTGGAATCTTCCGCTCCGTAGGCGGACGCGTTATCCATTGCGCCACAAGGCC
phaw_30.0010170	43714-43785	RF00005	tRNA	Gene	tRNA	GGCTTGACCGGGATTTGAACCCGGGACCTCTCGCACCCAAAGCGAGAATCATACCCCTAGACCATCAAGCC
phaw_30.0010170	45603-45674	RF00005	tRNA	Gene	tRNA	GGCTTGACCGGGATTTGAACCCGGGACCTCTCGCACCCTAAGCGAGAATCATACCCCTAGACCATCAAGCC
phaw_30.0010170	46090-46162	RF00005	tRNA	Gene	tRNA	GACCTTGCCAGGGGTCGAACCTGGAATCTTCCGCTCCGTAGGCGGACGCGTTATCCATTGCGCCACAAGGCC
phaw_30.0010170	49392-49464	RF00005	tRNA	Gene	tRNA	GACCTTGCCAGGGGTCGAACCTGGAATCTTCCGCTCCGTAGGCGGACGCGTTATCCATTGCGCCACAAGGCC
phaw_30.0010170	55631-55703	RF00005	tRNA	Gene	tRNA	GACCTTGCCAGGGGTCGAACCTGGAATCTTCCGCTCCGTAGGCGGACGCGTTATCCATTGCGCCACAAGGCC
phaw_30.0010170	56346-56417	RF00005	tRNA	Gene	tRNA	GGCTTGACCGGGATTTGAACCCGGGACCTCTCGCACCCTAAGCGAGAATCATACCCCTAGACCATCAAGCC
phaw_30.0010170	57005-57076	RF00005	tRNA	Gene	tRNA	GGCTTGACCGGGATTTGAACCCGGGACCTCTCGCACCCAAAGCGAGAATCATACCCCTAGACCATCAAGCC
phaw_30.0010170	57493-57565	RF00005	tRNA	Gene	tRNA	GACCTTGCCAGGGGTCGAACCTGGAATCTTCCGCTCCGTAGGCGGACGCGTTATCCATTGCGCCACAAGGCC
phaw_30.0010170	68677-68748	RF00005	tRNA	Gene	tRNA	GGCTTGACCGGGATTTGAACCCGGGACCTCTCGCACCCTAAGCGAGAATCATACCCCTAGACCATCAAGCC
phaw_30.0010170	71836-71908	RF00005	tRNA	Gene	tRNA	GACCTTGCCAGGGGTCGAACCTGGAATCTTCCGCTCCGTAGGCGGACGCGTTATCCATTGCGCCACAAGGCC
phaw_30.0010170	82370-82441	RF00005	tRNA	Gene	tRNA	GGCTTGACCGGGAATTGAACCCGGGACCTCTCGCACCCGAAGCGAGAATCATACCCCTAGACCATCAAGCC
phaw_30.0010295	39051-39124	RF00005	tRNA	Gene	tRNA	GCCGGTTAGCTCAGTCGGTTAGAGCGCCGTGCTAATAACGCGGATGTCGTGGGTTCGATCCCCATACTGGCCA
phaw_30.0010295	49443-49516	RF00005	tRNA	Gene	tRNA	GGCCAGTATGGGGATCGAACCCACGACATCCGCGTTATTAGCACGGCGCTCTAACCGACTGAGCTAACCGGCC
phaw_30.0010295	50524-50597	RF00005	tRNA	Gene	tRNA	GCCGGTTAGCTCAGTCGGTTAGAGCGCCGTGCTAATAACGCGGATGTCGTGGGTTCGATCCCCATACTGGCCA
phaw_30.0010295	57061-57134	RF00005	tRNA	Gene	tRNA	GCCGGTTAGCTCAGTCGGTTAGAGCGCCGTGCTAATAACGCGGATGTCGTGGGTTCGATCCCCATACTGGCCA
phaw_30.0010295	57948-58021	RF00005	tRNA	Gene	tRNA	GCCGGTTAGCTCAGTCGGTTAGAGCGCCGTGCTAATAACGCGGATGTCGTGGGTTCGATCCCCATACTGGCCA
phaw_30.0010295	71505-71578	RF00005	tRNA	Gene	tRNA	GGCCAGTATGGGGATCGAACCCACGACATCCGCGTTATTAGCACGGCGCTCTAACCGACTGAGCTAACCGGCC
phaw_30.0010358	34052-34123	RF00005	tRNA	Gene	tRNA	GGGCCCACCGGGAATCGAACCCGGGTTATCGGATTTAAAGTCCGATGTGCTAACCACTACACCATGGGCCC
phaw_30.0010367	10565-10636	RF00005	tRNA	Gene	tRNA	TCCCATGCCGGGAATCGAACCCGGGTCTCGTGGGTGAAAGCCAGGTATTCTAGCCACTAAATCACATGGGA
phaw_30.0010401	36160-36231	RF00005	tRNA	Gene	tRNA	GCCGTGACCAGGATTCGAACCTGGGTTATTGCGGCCACAACGCAATGTACTAACCACTATACGATCACGGC
phaw_30.0010401	76033-76104	RF00005	tRNA	Gene	tRNA	CGATGGTGGTATAGTGGTGAGCATAGCTGCCTTCCAAGCAGTTGACCCGGGTTCGATTCCCGGCCATCGCA
phaw_30.0010401	76561-76642	RF00005	tRNA	Gene	tRNA	GACGAGGATGGGATTCGAACCCACGCACGGAGACCGTATTGGATTAGCAGTCCAACGCCTTAACCACTCGGCCACCTCGCC
phaw_30.0010473	54417-54473	RF00005	tRNA	Gene	tRNA	GAACCTGCAATCTTCGGATCCGAAGTCCGACGCCTTATCCATTAGGCCACATGGTC
phaw_30.0010473	58441-58513	RF00005	tRNA	Gene	tRNA	GACCATGACAGGACTCGAACCTGCAATCTTCGGATCCGAAGTCCGACGCCTTATCCATTAGGCCACATGGTC
phaw_30.0010477	48424-48495	RF00005	tRNA	Gene	tRNA	CCGTGATCGTATAGTGGTTAGTACATTGCGTTGTGGCCGCAATAACCCAGGTTCGAATCCTGGTCACGGCA
phaw_30.0010477	48554-48625	RF00005	tRNA	Gene	tRNA	GGCCTGTCCGGGATTTGAACCCGGGACCTCCTGCACCCAAAGCAGGAATCATACCCCTAGACCAACAGGCC
phaw_30.0010633	31756-31827	RF00005	tRNA	Gene	tRNA	GGCTTGACCGGGATTTGAACCCGGGACCTCTCGCACCCTAAGCGAGAATCATACCCCTAGACCATCAAGCC
phaw_30.0010633	54521-54592	RF00005	tRNA	Gene	tRNA	GGCTTGACCGGGATTTGAACCCGGGACCTCTCGCACCCTAAGCGAGAATCATACCCCTAGACCATCAAGCC
phaw_30.0010658	20990-21062	RF00005	tRNA	Gene	tRNA	TGCTTATGGTGTAGTGGTTATCACGTCTGTCTAACACACAGAAGGTCCCTGGTTCGAGCCCAGGTAAGCACA
phaw_30.0010658	23119-23191	RF00005	tRNA	Gene	tRNA	GCTCCCGCCAGGGCTCGAACCTGGGACCTTCTGCGTGTAAAGCAGACGTGATAACCACTACACTACGAGAGC
phaw_30.0010741	5778-5849	RF00005	tRNA	Gene	tRNA	GGCTTGTCCGGGAATTGAACCCGGGACCTCTCGCACCCGAAGCGAGAATCATACCCCTAGACCAACAAGCC
phaw_30.0010741	13691-13762	RF00005	tRNA	Gene	tRNA	GCTCGTTGGTCTAGGGGTATGATTCTCGCTTAGGGTGCGAGAGGTCCCGGGTTCAAATCCCGGACGAGCCC
phaw_30.0010741	26018-26090	RF00005	tRNA	Gene	tRNA	CCTTCATAGCTCAGGGGTTAGAGCGCTGGTCTAGTAAACCAGAGGTCGGGAGTTCGATTCTCCCTGAAGGCA
phaw_30.0010741	29060-29133	RF00005	tRNA	Gene	tRNA	GCCCCCGGGTGGGCTCGAACCACCAACCTTTCGGTTAACAGCCGAACGCGCTAACCGATTGCGCCACGGAGGC
phaw_30.0010808	41442-41499	RF00005	tRNA	Gene	tRNA	TGGGGAACGAACCCACGACATCCGCGTTATCAGCACGGCGCTCTAACCGACTGAGCT
phaw_30.0010812	25498-25570	RF00005	tRNA	Gene	tRNA	GACCGTGACAGGACTCGAACCTGCAATCTTCGGATCCGAAGTCCGACGCCTTAAACATTAGGCCACACGGCC
phaw_30.0010826	27411-27482	RF00005	tRNA	Gene	tRNA	GCGATGGCCGGAAATCGAACCCGGGTCAACTGCTTGGAAGGCAGCTATGCTCACCACTATACCACCATCGC
phaw_30.0010826	30999-31070	RF00005	tRNA	Gene	tRNA	AGCAGAGCGTGGTTTCGATCCACGGACCTCTGGGTTATGGGCCCAGCACGCTTCCTCTGCGCCACTCTGCT
phaw_30.0010883	19480-19553	RF00005	tRNA	Gene	tRNA	GGCCAGTATGGGGATCGAATCCACGACATCTGCGTTATCAGCACGGCGCTGTAACCGACTGAGCTAACTGACA
phaw_30.0010895	49843-49924	RF00005	tRNA	Gene	tRNA	GCAGCGTGGCCGAGTGGTCTAAGGCGCTGGATTTAGGCTCCAGTCTCTCAGGAGGCGTGGGTTCGAATCCCACCGCTGTCA
phaw_30.0010929	28274-28345	RF00005	tRNA	Gene	tRNA	CCGTGATCGTATAGTGGTTAGTACATTGCGTTGTGGCCGCAATAACCCAGGTTCGAATCCTGGTCACGGCA
phaw_30.0010929	33743-33814	RF00005	tRNA	Gene	tRNA	CCGTGATCGTATAGTGGTTAGTACATTGCGTTGTGGCCGCAATAACCCAGGTTCGAATCCTGGTCACGGCA
phaw_30.0010929	36969-37040	RF00005	tRNA	Gene	tRNA	CCGTGATCGTATAGTGGTTAGTACATTGCGTTGTGGCCGCAATAACCCAGGTTCGAATCCTGGTCACGGCA
phaw_30.0010929	153151-153222	RF00005	tRNA	Gene	tRNA	GCCGTGACCAGGATTCGAACCTGGGTTATTGCGGCCACAACGCAATGTTCTAACCACTATACGATCACGGC
phaw_30.0011033	54289-54363	RF00005	tRNA	Gene	tRNA	GCATCGAGTGAGGATCGAACTCACGATCTTCAGTTTATGAAACTGATGCGCTGCCTCTACTGCGCTTCCGAGGC
phaw_30.0011047	64114-64185	RF00005	tRNA	Gene	tRNA	GACCCCAGAGTGACTCGAACACCCAACCTTCTGATCTGGAGTCAGACGCGCTACCATTGCGCCATAGGGCC
phaw_30.0011118	85838-85910	RF00005	tRNA	Gene	tRNA	AGCCTGTGCAGGACTCGAACCTGCGACCTCTCGTAAATCCGATCGAGTGCTCTGCCCCTGAGCTAACAGGCA
phaw_30.0011229	2597-2669	RF00005	tRNA	Gene	tRNA	GCCTTCAGGGAGAATCGAACTCCCGACCTCTGGTTTACTAGACCAGCGCTCTAACCCCTGAGCTATGAAGGC
phaw_30.0011229	12140-12211	RF00005	tRNA	Gene	tRNA	GGCTCGTCCGGGATTTGAACCCGGGACCTCTCGCACCCTAAGCGAGAATCATACCCCTAGACCAACGAGCC
phaw_30.0011229	22377-22448	RF00005	tRNA	Gene	tRNA	GCTTGTTGGTCTAGGGGTATGATTCTCGCTTCGGGTGCGAGAGGTCCCGGGTTCAATTCCCGGACAAGCCC
phaw_30.0011229	73370-73441	RF00005	tRNA	Gene	tRNA	GCCGCCAGAGAGAATCGAACTCTCGACCCCTAGTTTACGAGACTAGTGCTCTGCCCCTGAGCTATGGCGGC
phaw_30.0011299	8917-8989	RF00005	tRNA	Gene	tRNA	CCCGGCTAGCTCAGTCGGTAGAGCACGAGACTCTTAATCTCGGGGTCGTGGGTTCGAGCCCCACGTTGGGCG
phaw_30.0011600	22968-23067	RF00005	tRNA	Gene	tRNA	GCCTGTTAGCTCAGTGGTAGAGCACCAGTGAAATATAGTATATATGTAGAGTAGCTATATACGAGCTGGAGGTCACAAGTTCGATCCTTGTACAGGCTA
phaw_30.0011600	23294-23378	RF00005	tRNA	Gene	tRNA	AGCTCAGTGGTAGAGCACCAGTGAAATATAGTATATATGTAGAGTAGCTATATACGAGCTGGAGGTCACAAGTTCGATCCTTGT
phaw_30.0011600	31183-31269	RF00005	tRNA	Gene	tRNA	GCCTGTTAGCTCAGCGGCAGAGCACCAGTTAACCGATATGGCCATACGTTCGCTGGAGGTCACAAGTTCGATCCTTGTACAGGCTA
phaw_30.0011600	44386-44469	RF00005	tRNA	Gene	tRNA	GCCTGTTAGCTCAGTGGCAGAGCACCAGCAGTTCTCTCTTGGAAACAAGCTGGCGGTCGCAAGTTCGATCCTTGCACAGGCTA
phaw_30.0011600	68997-69081	RF00005	tRNA	Gene	tRNA	GCCTGTTAGCTCAGTGGCAGAGCACCAGCAGGGTTCTGCCTGAAAACAAGCTGGAGGTCGCAAGTTCGATCCTTGCACAGGCTA
phaw_30.0011626	32702-32774	RF00005	tRNA	Gene	tRNA	GACCGTGACAGGACTCGAACCTGCAATCTTCGGATCCGAAGTCCGACGCCTTATCCATTAGGCCACACGGCC
phaw_30.0011874	100225-100297	RF00005	tRNA	Gene	tRNA	CCCGGATGGCTCAGTCGGTAGAGCATCAGGCTTTTAACCTGAGGGTCCAGGGTTCGAGTCCCTGTTCGGGCG
phaw_30.0012001	27695-27778	RF00005	tRNA	Gene	tRNA	GTCAGGAGTGGGATTCGAACCCACGCCTGGAGAACCAGACTGCGACCTGAACGCAGCGCCTTGGACCGCTCGGCCATCCTGAC
phaw_30.0012116	13453-13525	RF00005	tRNA	Gene	tRNA	GCCCAACGTGTGTCTCGAACCCACGACCCCGAGATTAAGAGTCTCTTGCTCTACCAACTGAGCTAGCCGGAC
phaw_30.0012147	16634-16706	RF00005	tRNA	Gene	tRNA	TGCTTATGGTGTAGTGGTTATCACGTCTGTCTTACACACAGAAGGTCCCTGGTTCGAGCCCAGGTAAGCACA
phaw_30.0012147	49399-49472	RF00005	tRNA	Gene	tRNA	GGCCAGTATGGGGATCGAACCCACGACATCCGCGTTATTAGCACGGCGCTCTAACCGACTGAGCTAACCGGCC
phaw_30.0012393	27395-27483	RF00005	tRNA	Gene	tRNA	CCCCAGTGGCGCAATCGGTCAGCGCGCGGTACTTATACGACAGTATTGAGCTATGCCGAGGTTGTGAGTTCGAGCCTCACCTGGGGCA
phaw_30.0012645	12791-12906	RF00005	tRNA	Gene	tRNA	TCAGGATGGCCGAGTGGTCTAAGGCGCCAGACTCAAGGCAACTTGTCTCTGATCAAGAGACGTTGGGCGTTCTGGTCCTCTCAGGAGGGCGTGGGTTCGAATCCCACTTCTGACA
phaw_30.0012645	14512-14627	RF00005	tRNA	Gene	tRNA	GTCAGAAGTGGGATTCGAACCCACGCCCTCCTGAGAGGACCAGAACGCCCAATGTCTCTTCACCAGAGACAAGTTTCCTTGAGTCTGGCGCCTTAGACCACTCGGCCATCCTGAC
phaw_30.0012675	56766-56837	RF00005	tRNA	Gene	tRNA	TTGTATACCGGGAATCGAACCCGGGCCTCCTGGACAAAAGCCAGGTATCCTATCCACTATACCACGTAGGA
phaw_30.0012785	21986-22041	RF00005	tRNA	Gene	tRNA	GGGGAATCGAACCCCGGTCTCCCGCATCACAGGCGGGGATACTCACAACTATACT
phaw_30.0012794	3783-3855	RF00005	tRNA	Gene	tRNA	TGCTTATGGTGTAGTGGTTATCACGTCTGTCTAACACACAGAAGGTCCCTGGTTCGAGCCCAGGTAAGCACA
phaw_30.0012815	5988-6060	RF00005	tRNA	Gene	tRNA	GCCCGAACAGGGACTCGAACCCTGGACCCTCAGGTTAAAAGCCTGATGCTCTACCGACTGAGCCATCCGGGC
phaw_30.0012815	19148-19220	RF00005	tRNA	Gene	tRNA	CCCGGATGGCTCAGTCGGTAGAGCATCAGGCTTTTAACCTGAGGGTCCAGGGTTCGAGTCCCTGTTCGGACG
phaw_30.0012815	26219-26291	RF00005	tRNA	Gene	tRNA	CCCGGATGGCTCAGTCGGTAGAGCATCAGGCTTTTAACCTGAGGGTCCAGGGTTCGAGTCCCTGTTCGGGCG
phaw_30.0012815	38893-38965	RF00005	tRNA	Gene	tRNA	CCCGGATGGCTCAGTCGGTAGAGCATCAGGCTTTTAACCTGAGGGTCCAGGGTTCGAGTCCCTGTTCGGGCG
phaw_30.0012815	46704-46776	RF00005	tRNA	Gene	tRNA	CCCGGATGGCTCAGTCGGTAGAGCATCAGGCTTTTAACCTGAGGGTCCAGGGTTCGAGTCCCTGTTCGGGCG
phaw_30.0012907	33050-33122	RF00005	tRNA	Gene	tRNA	GCCCGAACAGGGACTCGAACCCTGGACCCTCAGGTTAAAAGCCTGATGCTCTACCGACTGAGCCATCCGGGC
phaw_30.0013288	25072-25133	RF00005	tRNA	Gene	tRNA	GGGGATTCGAACCCCGAGTTATCAAATTTAAAGTTCGATGTGTCAATTAACCGCCACACCA
phaw_30.0013310	8838-8911	RF00005	tRNA	Gene	tRNA	GGCCAGTATGGGGATCGAATCCACGACATCCGCGTTATCAGCACGGCGCTGTAACCGACTGAGCTAACTGACA
phaw_30.0013430	16212-16285	RF00005	tRNA	Gene	tRNA	GGCCAGTATGGGGATCGAACCCACGACATCCGCGTTATTAGCACGGCGCTCTAACCGACTGAGCTAACCGGCC
phaw_30.0013430	24513-24586	RF00005	tRNA	Gene	tRNA	GCCGGTTAGCTCAGTCGGTTAGAGCGCCGTGCTAATAACGCGGATGTCGTGGGTTCGATCCCCATACTGGCCA
phaw_30.0013430	66006-66078	RF00005	tRNA	Gene	tRNA	TCTCCGTGGCGCAGTGGATAGCGCGCTGGACTTCTAATCCAGAGGCCGCGGGTTCGAATCCCGTCGGAGATG
phaw_30.0013533	53831-53903	RF00005	tRNA	Gene	tRNA	ACCGTGTGGCCTAATGGATAAGGCGTCGGACTTCGGATCCGAAGATTGCAGGTTCGAGTCCTGTCACGGTCG
phaw_30.0013596	18132-18203	RF00005	tRNA	Gene	tRNA	GGGGGCGCCCGGGTTTGAACCGGGGACCTCTCGATCTGCAGTCGAATGCTCTACCACTGAGCTACACCCCC
phaw_30.0013596	22199-22271	RF00005	tRNA	Gene	tRNA	GTGCTTACCTGGGCTCGAACCAGGGACCTTCTGTGTGTTAGACAGACGTGATAACCACTACACCATAAGCAC
phaw_30.0013596	43858-43929	RF00005	tRNA	Gene	tRNA	GGTTCTACCGAGACTCGAACTCGGATCGCTGGATTCAAAGTCCAGAGTGCTAACCATTACACCATAGAACC
phaw_30.0013596	59328-59400	RF00005	tRNA	Gene	tRNA	GCCTTGTGGCGCAATGGATAACGCGTCCGCCTACGGAGCGGAAGATTCCAGGTTCGACCCCTGGCAAGGTCG
phaw_30.0013604	16731-16802	RF00005	tRNA	Gene	tRNA	CCCATGTGGTCTAGTGGCTAGGATACCTGGCTTTCACCCAGGAGGCCCGGGTTCGATTCCCGGCATGGGAA
phaw_30.0013704	67343-67401	RF00005	tRNA	Gene	tRNA	GGCTCAGTCGGTTAGAGCGTCGTGCTGATAACGCGAATGTCGTGGGTTCGATCCCCAT
phaw_30.0013801	36678-36750	RF00005	tRNA	Gene	tRNA	ACCCCTGGCGGGACTCGAACCCGCAATCCCTGGCTTAGGAGGCCAATGCCTTATCCATTAGGCCACAGGGGC
phaw_30.0013928	4319-4392	RF00005	tRNA	Gene	tRNA	GCCGGTTAGCTCAGTCGGTTAGAGTGTCGTGCTGATAACGCGGATGTCGTGGGTTCGATCCCCATACTGGCCC
phaw_30.0014066	5686-5757	RF00005	tRNA	Gene	tRNA	GCTTGATGGTCTAGGGGTATGATTCTCGCTTAGGGTGCGAGAGGTCCCGGGTTCAAATCCCGGTCAAGCCC
phaw_30.0014066	12278-12349	RF00005	tRNA	Gene	tRNA	GCTTGATGGTCTAGGGGTATGATTCTCGCTTTGGGTGCGAGAGGTCCCGGGTTCAAATCCCGGTCAAGCCC
phaw_30.0014066	12422-12493	RF00005	tRNA	Gene	tRNA	GCTAGATGGTCTAGGGTCATGATTCTCGCTTAGGGTGCGAGAGGTTCCGGGTTCAAATCCCGGTCAAGCCC
phaw_30.0014066	12566-12636	RF00005	tRNA	Gene	tRNA	GCTTGATGGTCTAGGGGTATGATTCTCGCTTAGGGTGCGAGAGGTCCCGGGTCAAATCCCGGTCAAGCCC
phaw_30.0014066	28093-28164	RF00005	tRNA	Gene	tRNA	CCTCGGTAGTATAGTGGTGAGTATCCCCGCCTGTCACGCGGGAGACCGGGGTTCGATTCCCCGCCGGGGAG
phaw_30.0014066	38145-38217	RF00005	tRNA	Gene	tRNA	GTTTCCGCCCGGGATCGAACCGGGGACCTTGCGCGTGTGAGGCGCACGTGATAACCACTACACTACGGAAAC
phaw_30.0014066	44159-44230	RF00005	tRNA	Gene	tRNA	TCCCCGGCGGGGAATCGAACTCCGGTCTCCCGCGTGACAGGCGGGAATACTCACCACTATACTACCGAGGA
phaw_30.0014066	49753-49824	RF00005	tRNA	Gene	tRNA	GGCTTGACCGGGAATTGAACCCGGGACCTCTCGCACCCGAAGCGAGAATCATACCCCTAGACCATCAAGCC
phaw_30.0014192	24622-24693	RF00005	tRNA	Gene	tRNA	GGAGGTGCCGGGGATCGAACCCGGGGCTTTTCGCATGCAAAGCGAACACTCTACCACTGAGTTACACCCCC
phaw_30.0014192	25159-25230	RF00005	tRNA	Gene	tRNA	GGGGTGTAACTCAGTGGTAGAGTGTTCGCTTCGCATGCGAAAAGCCCCGGGTTCGATCCCCGGCACCTCCA
phaw_30.0014192	28208-28279	RF00005	tRNA	Gene	tRNA	GGAGGTGCCGGGGATCGAACCCGGGGCTTTTCGCATGCAAAGCGAACACTCTACCACTGAGTTACACCCCC
phaw_30.0014192	49423-49495	RF00005	tRNA	Gene	tRNA	TTTCCGTAGTGTAGTGGTTATCACGTGCGCCTCACACGCGCAAGGTCCCCGGTTCGATCCCGGGCGGAAACA
phaw_30.0014300	55819-55892	RF00005	tRNA	Gene	tRNA	GGCCAGTATGGGGAACGAACCCACGACATCCGCGTTATCAGCACGGCGCTCTAACCAACTGAGCTAACCGGCT
phaw_30.0014386	30554-30609	RF00005	tRNA	Gene	tRNA	TGAGGATCGAACTCACGACCTTCAGATTATGAGACTGACGCGCTGCCTACTGCGC
phaw_30.0014386	49107-49179	RF00005	tRNA	Gene	tRNA	GGAGCTGCGGGGTATCGATCCCCGTACCTCTCGCATGCTAAGCGAGCGCTCTACCATCTGAGCTACAGCCCC
phaw_30.0014386	50511-50592	RF00005	tRNA	Gene	tRNA	GTAGCGTGGCCGAGCGGTCTAAGGCGCTGGTTTAAGGCACCAGTCTCTTCGGAGGCGTGGGTTCGAATCCCACCGCTGCCA
phaw_30.0014386	51486-51567	RF00005	tRNA	Gene	tRNA	GTAGCGTGGCCGAGCGGTCTAAGGCGCTGGTTTAAGGCACCAGTCTCTTCGGAGGCGTGGGTTCGAATCCCACCGCTGCCA
phaw_30.0014386	58928-59000	RF00005	tRNA	Gene	tRNA	GGGCTGTAGCTCAAATGGTAGAGCGCTCGCTTAGCATGCGAGAGGTACGGGGATCGATGCCCCGCAGCTCCA
phaw_30.0014386	59062-59133	RF00005	tRNA	Gene	tRNA	GGTTCTACCGAGACTCGAACTCGGATTGTTGGATTCAGAGTCCAAAGTGCTAACCATTACACCATAGAACC
phaw_30.0014386	62050-62122	RF00005	tRNA	Gene	tRNA	GGGCTGTAGCTCAAATGGTAGAGCGCTCGCTTAGCATGCGAGAGGTACGGGGATCGATACCCCGCAGCTCCA
phaw_30.0014386	62835-62907	RF00005	tRNA	Gene	tRNA	GGGCTGTAGCTCAAATGGTAGAGCGCTCGCTTAGCATGCGAGAGGTACGGGGATCGATGCCCCGCAGCTCCA
phaw_30.0014386	64789-64860	RF00005	tRNA	Gene	tRNA	GGTTCTACCGAGACTCGAACTCGGATTGTTGGATTCAGAGTCCAAAGTGCTAACCATTACACCATAGAACC
phaw_30.0014386	86957-87028	RF00005	tRNA	Gene	tRNA	GGTCCTACCGAGACTCGAACTCGGATTGTTGGATTCAGAGTCCAAAGTGCTAACCATTACACCATAGGACC
phaw_30.0014386	87952-88024	RF00005	tRNA	Gene	tRNA	GGAGCTGCGGGGTATCGATCCCCGTACCTCTCGCATGCTAAGCGAGCGCTCTACCATTTGAGCTACAGCCCC
phaw_30.0014386	89971-90043	RF00005	tRNA	Gene	tRNA	GGAGCTGCGGGGCATCGATCCCCGTACCTCTCGCATGCTAAGCGAGCGCTCTACCATTTGAGCTACAGCCCC
phaw_30.0014386	96881-96953	RF00005	tRNA	Gene	tRNA	GGGCTGTAGCTCAAATGGTAGAGCGCTCGCTTAGCATGCGAGAGGTACGGGGATCGATGCCCCGCAGCTCCA
phaw_30.0014386	98215-98287	RF00005	tRNA	Gene	tRNA	GGGCTGTAGCTCAAATGGTAGAGCGCTCGCTTAGCATGCGAGAGGTACGGGGATCGATGCCCCGCAGCTCCA
phaw_30.0014451	44660-44745	RF00005	tRNA	Gene	tRNA	CTTCGATAGCTCAGTTGGTAGAGCGGTGGACTGTAGTGGTTTCACAGTTATCCATAGGTCACTGGTTCGAATCCGGTTCGAAGGA
phaw_30.0014451	51472-51543	RF00005	tRNA	Gene	tRNA	TCCCATGCCGGGAATCGAACCCGGGCCTCCTGGGTGAAAGCCAGGTATCCTAGCCACTAGACCACATGGGA
phaw_30.0014483	80525-80610	RF00005	tRNA	Gene	tRNA	CTTCGATAGCTCAGTTGGTAGAGCGGTGGACTGTAGTGGAAGTACGGTTATCCATAGGTCACTGGTTCGAATCCGGTTCGAAGGA
phaw_30.0014548	14995-15067	RF00005	tRNA	Gene	tRNA	TGCTTATGGTGTAGTGGTTATCACGTCTGTCTAACACACAGAAGGTCCCTGGTTCGAGCCCAGGTAAGCACA
phaw_30.0014572	5964-6036	RF00005	tRNA	Gene	tRNA	CCCGGCTAGCTCAGTCGGTAGAGCACGAGACTCTTAATCTCGGGGTCGTGGGTTCGAGCCCCACGTTGGGCG
phaw_30.0014765	760-832	RF00005	tRNA	Gene	tRNA	GCCCGAACAGGGACTCGAACCCTGGACCCTCAGGTTAAAAGCCTGATGCTCTACCGACTGAGCCATCCGGGC
phaw_30.0014765	17825-17897	RF00005	tRNA	Gene	tRNA	GGGCTGTAGCTCAAATGGTAGAGCGCTCGCTTAGCATGCGAGAGGTACGGGGATCGATGCCCCGCAGCTCCA
phaw_30.0014765	17981-18052	RF00005	tRNA	Gene	tRNA	GGTTCTACCGAGACTCGAACTCGGATTGTTGGATTCAGAGTCCAAAGTGCTAACCATTACACCATAGAACC
phaw_30.0014765	18868-18939	RF00005	tRNA	Gene	tRNA	GGTTCTACCGAGACTCGAACTCGGATTGTTGGATTCAGAGTCCAAAGTGCTAACCATTACACCATAGAACC
phaw_30.0014828	31561-31642	RF00005	tRNA	Gene	tRNA	GACAGCGGTGGGATTCGAACCCACGCCTCCTGAGAGACTGGAGCCTAAATCCAGCGCCTTAGACCACTCGGCCACGCTGCC
phaw_30.0014852	5492-5564	RF00005	tRNA	Gene	tRNA	AGCCTGTGCAGGACTCGAACCTGCGACCTCTCGTAAATCCGATCGAGTGCTCTGCCCCTGAGCTAACAGGCA
phaw_30.0014863	66609-66692	RF00005	tRNA	Gene	tRNA	GTCAGGTGTGGGGTTCGAACCCACGCACTCCTGAGAGTATCAGAGCTTAAATCTGACGCCTTAGACCACTCGGCCAACCTGAC
phaw_30.0015022	6610-6682	RF00005	tRNA	Gene	tRNA	ACCTCCGGCGGGACTCGAACCCGCAATCCCTGGCTTAGGAGGCCAATGCCTTATCCATTAGGCCACGGAGGC
phaw_30.0015022	35731-35803	RF00005	tRNA	Gene	tRNA	GCCCAACGTGGGGCTCGAACCCACGACCCCGAGATTAAGAGTCTCGTGCTCTACCGACTGAGCTAGCCGGGC
phaw_30.0015022	36058-36130	RF00005	tRNA	Gene	tRNA	GCCCAACGTGGGGCTCGAACCCACGACCCCGAGATTAAGAGTCTCGTGCTCTACCGACTGAGCTAGCCGGGC
phaw_30.0015022	43903-43975	RF00005	tRNA	Gene	tRNA	GCCCAACGTGGGGCTCGAACACACGACCCCGAGATTAAGAGTCTCGTGCTCTACCGACTGAGCTAGCCGGGC
phaw_30.0015022	51082-51154	RF00005	tRNA	Gene	tRNA	CCCGGCTAGCTCAGTCGGTAGAGCACGAGACTCTTAATCTCGGGGTCGTGGGTTCGAGCCCCACGTTGGGCG
phaw_30.0015065	34881-34952	RF00005	tRNA	Gene	tRNA	GCGATGGCCGGGAATCGAACCCGGGTCAACTGCTTGGAAGGCAGCTATGCTCACCACTATACCACCATCGC
phaw_30.0015065	35354-35425	RF00005	tRNA	Gene	tRNA	CGATGGTGGTATAGTGGTGAGCATAGCTGCCTTCCAAGCAGTTGACCCGGGTTCGATTCCCGGCCATCGCA
phaw_30.0015074	62706-62778	RF00005	tRNA	Gene	tRNA	GCCGTGTGGCCTAATGGATAAGGCGTCGGACTTCGGATCCGAAGATTGCAGGTTCGAGTCCTGTCACGGTCG
phaw_30.0015194	33593-33663	RF00005	tRNA	Gene	tRNA	CAACGGTGGTTTAGTGGTAGAATTTTCGCTAGCTACGAGGGAGGCCCGGGTTCGATTCTCGGCCGATGCA
phaw_30.0015290	25274-25340	RF00005	tRNA	Gene	tRNA	ACGGTGTAGTGTTAAGCACATCGGATTTTAAATCCGAGAACCCGGTTTCGATGCCCGGCGGCGTTT
phaw_30.0015319	96041-96113	RF00005	tRNA	Gene	tRNA	GCCTTGTGGCGCAATGGATAACGCGTCCGCCTACGGAGCGGAAGATTCCAGGTTCGACCCCTGGCAAGGTCG
phaw_30.0015489	44804-44876	RF00005	tRNA	Gene	tRNA	CCCCTGTGGCCTAATGGATAAGGCATTGGCCTCCTAAGCCAGGGATTGCGGGTTCGAGTCCCGCCAGGGGTT
phaw_30.0015593	26960-27033	RF00005	tRNA	Gene	tRNA	GCCGGTTAGCTCAGTCGGTTAGAGCGCCGTGCTAATAACGCGGATGTCGTGGGTTCGATCCCCATACTGGCCA
phaw_30.0015795	12510-12583	RF00005	tRNA	Gene	tRNA	GCCGGTTAGCTCAGTCGGTTAGAGCGCCGTGCTAATAACGCGGATGTCGTGGGTTCGATCCCCATACTGGCCA
phaw_30.0015895	29637-29710	RF00005	tRNA	Gene	tRNA	GCCCCCGGGTGGGCTCGAACCACCAACCTTTCGGTTAACAGCCGAACGCGCTAACCGATTGCGCCACGGAGGC
phaw_30.0015895	35240-35313	RF00005	tRNA	Gene	tRNA	GCCCCCGGGTGGGCTCGAACCACCAACCTTTCGGTTAACAGCCGAACGCGCTAACCGATTGCGCCACGGAGGC
phaw_30.0015895	42298-42371	RF00005	tRNA	Gene	tRNA	CCTCCGTGGCGCAATCGGTTAGCGCGTTCGGCTGTTAAACGAAAGGTTGGTGGTTCGAGCCCACCCGGGGGCG
phaw_30.0015895	45514-45587	RF00005	tRNA	Gene	tRNA	GCCCCCGGGTGGGCTCGAACCACCAACCTTTCGGTTAACAGCCGAACGCGCTAACCGATTGCGCCACGGAGGC
phaw_30.0015895	48226-48298	RF00005	tRNA	Gene	tRNA	CCTCCATAGCTCAGGGGTTAGAGCGCTGGTCTTGTAAACCAGAGGCCGGGAGTTCGAATCTCCCTGGTGGCA
phaw_30.0015895	67875-67948	RF00005	tRNA	Gene	tRNA	GCCCCCGGGTGGGCTCGAACCACCAACCTTTCGGTTAACAGCCGAACGCGCTAACCGATTGCGCCACGGAGGC
phaw_30.0015895	73352-73424	RF00005	tRNA	Gene	tRNA	GCCTTCAGGGAGAATCGAACTCCCGGCCTCTGGTTTACTAGACCAGCGCTCTAACCCCTGAGCTATGAAGGC
phaw_30.0015895	73929-74002	RF00005	tRNA	Gene	tRNA	CCTCCGTGGCGCAATCGGTTAGCGCGTTCGGCTGTTAACCGAAAGGTTGGTGGTTTGAGCCCACCCGGGGGCG
phaw_30.0015895	74507-74580	RF00005	tRNA	Gene	tRNA	CCTCCGTGGCGCAATCGGTTAGCGCGTTCGGCTGTTAACCGAAAGGTTGGTGGTTCGAGCCCACCCGGGGGCG
phaw_30.0015895	77406-77479	RF00005	tRNA	Gene	tRNA	CCTCCGTGGCGCAATCGGTTAGCGCGTTCGGCTGTTAACCGAAAGGTTGGTGGTTCGAGCCCACCCGGGGGCG
phaw_30.0015895	77904-77977	RF00005	tRNA	Gene	tRNA	CCTCCGTGGCGCAATCGGTTAGCGCGTTCGGCTGTTAACCGAAAGGTTGGTGGTTCGAGCCCACCCGGGGGCG
phaw_30.0015895	79883-79956	RF00005	tRNA	Gene	tRNA	CCTCCGTGGCGCAATCGGTTAGCGCGTTCGGCTGTTAACCGAAAGGTTGGTGGTTCGAGCCCACCCGGGGGCG
phaw_30.0016121	40866-40938	RF00005	tRNA	Gene	tRNA	CCCGGCTAGCTCAGTCGGTAGAGCACGAGACTCTTAATCTCGGGGTCGTGGGTTCGAGCCCCACGTTGGGCG
phaw_30.0016127	19876-19957	RF00005	tRNA	Gene	tRNA	CTGCGGTGTCCGAGTGGTTAAGGAGATGGACTAGAAATCCATTGGGCTCTGCCCGCACAGGTTCGAATCCTGTCTGCAGCG
phaw_30.0016127	21235-21316	RF00005	tRNA	Gene	tRNA	GCTGCGGACAGGATTCGAACCTGTGCGGGAAGATCCCAATGGATTTCGAGTCCATCTCCTTAACCACTCGGACACCGCAGC
phaw_30.0016150	54915-54987	RF00005	tRNA	Gene	tRNA	ATCCCGGCCGGGGGTCGAACCCGGGGCCTTTGGATTAGAAGTCCAACGCGCTTTCCACTGCGCCACCGGGAC
phaw_30.0016281	797-868	RF00005	tRNA	Gene	tRNA	GCTTGTTGGTCTAGGGGTATGATTCTCGCTTCGGGTGCGAGAGGTCCCGGGTTCAATTCCCGGACAAGCCC
phaw_30.0016443	37396-37467	RF00005	tRNA	Gene	tRNA	GGGGTGTAGCTCAGTGGTAGAGCATTCGACTGCAGATCGAGAGGTCCCCGGTTCAAACCCGGGCGCCCCCT
phaw_30.0016443	44095-44167	RF00005	tRNA	Gene	tRNA	GACCGTGACAGGACTCGAACCTGCAATCTTCGGATCCGAAGTCCGACGCCTTATCCATTAGGCCACACGGTC
phaw_30.0016774	39467-39538	RF00005	tRNA	Gene	tRNA	GCGATGGCCGGGAATCGAACCCGGGTCAACTGCTTGAAAGGCAGCTATGCTCACCACTATACAACCATCGA
phaw_30.0017095	58084-58155	RF00005	tRNA	Gene	tRNA	GCCGTGACCAGGATTCGAACCTGGGTTATTGCGGCCACAACGCAATGTACTAACCACTATACGATCACGGT
phaw_30.0017114	15912-15969	RF00005	tRNA	Gene	tRNA	AGCTCAGTCGGTAGAGCACGAGAATCTTAATCTCGGGGTCGTGGGTTCGAGCCTCAC
phaw_30.0017148	7988-8059	RF00005	tRNA	Gene	tRNA	GGGGGCGCCCGGGTTTGAACCGGGGACCTCTCGATCTGCAGTCGAATGCTCTACCACTGAGCTACACCCCC
phaw_30.0017148	43199-43271	RF00005	tRNA	Gene	tRNA	GCCTTGTGGCGCAATGGATAACGCGTCCGCCTACGGAGCGGAAGATTCCAGGTTCGACCCCTGGCAAGGTCG
phaw_30.0017174	30218-30288	RF00005	tRNA	Gene	tRNA	GCATCGGCCGGGAATCGAACCCGGGCCTCCCGCGTGGCAGGCGAGAATTCTACCACTGAACCACCGATGC
phaw_30.0017188	40160-40233	RF00005	tRNA	Gene	tRNA	CCTCCGTGGCGCAATCGGTTAGCGCGTTCGGCTGTTAACCGAAAGGTTGGTGGTTCGAGCCCACCCGGGGGCG
phaw_30.0017232	38920-38992	RF00005	tRNA	Gene	tRNA	GCCCCGAGTGAGGATCGAACTCACGACCTTCAGATTATGAGACTGACGCGCTGCCTACTGCGCTACCGAGGC
phaw_30.0017407	41884-41965	RF00005	tRNA	Gene	tRNA	GCGAGGTGGCCGAGTGGTTAAGGCGTTGGACTGCTAATCCAATACGGTCTCCGTGCGTGAGTTCGAATCTCATCCTCGTCG
phaw_30.0017437	5987-6059	RF00005	tRNA	Gene	tRNA	GCCCGAACAGGGACTCGAACCCTGGACCCTCAGGTTAAAAGCCTGATGCTCTACCGACTGAGCCATCCGGGC
phaw_30.0017437	46243-46326	RF00005	tRNA	Gene	tRNA	TCAGGTTGGCCGAGTGGTCTAAGGCGTCAGATTTAAGCTCTGATACTCTCAGGAGTGCGTGGGTTCGAACCCCACACCTGACA
phaw_30.0017454	4526-4598	RF00005	tRNA	Gene	tRNA	CCCGGATGGCTCAGTCGGTAGAGCATCAGGCTTTTAACCTGAGGGTCCAGGGTTCGAGTCCCTGTTCGGGCG
phaw_30.0017454	19459-19531	RF00005	tRNA	Gene	tRNA	GCCCAACGTGGGGCTCGAACCCACGACCCTGAGATTAAGAGTCTCATGCTCTACCGACTGAGCTAGCCGGGC
phaw_30.0017493	8591-8663	RF00005	tRNA	Gene	tRNA	GCCCAACGTGGGGCTCGAACCCACGACCCCGAGATTAAGAGTCTCGTGCTCTACCGACTGAGCTAGCCGGGC
phaw_30.0017529	49039-49112	RF00005	tRNA	Gene	tRNA	GGCCAGTATGGGGATCGAACCCACGACATTCGCGTTATCAGCACGACGCTCTAACCAACTGAGCTAACCGGCC
phaw_30.0017574	35967-36038	RF00005	tRNA	Gene	tRNA	CCCATGTGGTCTAGTGGCTAGGATACCTGGCTTTCACCCAGGAGGCCCGGGTTCGATTCCCGGCATGGGAA
phaw_30.0017615	6980-7061	RF00005	tRNA	Gene	tRNA	GGCAGCGGTGGGATTCGAACCCACGCCTCCGAAGAGACTGGTGCCTTAAACCAGCGCCTTAGACCGCTCGGCCACGCTACC
phaw_30.0017712	44409-44480	RF00005	tRNA	Gene	tRNA	CGATGGTGGTATAGTGGTGAGCATAGCTGCCTTCCAAGCAGTTGAACCGGGTTCGATTCCCGGCCATCGCA
phaw_30.0017872	34774-34847	RF00005	tRNA	Gene	tRNA	GCCCCTGGGTGGGCTCGAACCACCAACCTTTCGGTTAACAGCCGAACGCGCTAACCGATTGCGCCACAGAAGC
phaw_30.0017872	56026-56096	RF00005	tRNA	Gene	tRNA	CATTGGTGGTTCAGTGGTAGAATTCTCGCCTGCCACGCGGGAGGCCCGGGTTCGATTCCCGGCCAATGCA
phaw_30.0018086	38674-38746	RF00005	tRNA	Gene	tRNA	CCTTCATAGCTCAGGGGTTAGAGCGCTGGTCTAGTAAACCAGAGGCCGGGAGTTCGATTCTCCCTGAAGGCA
phaw_30.0018086	66121-66193	RF00005	tRNA	Gene	tRNA	CCTCCGTGGCCTAATGGATAAGGCATTGGCCTCCTAAGCCAGGGATTGCGGGTTCGAGTCCCGCCGGAGGTT
phaw_30.0018242	12360-12431	RF00005	tRNA	Gene	tRNA	TCCCCGGCGGGGAATCGAACCCCGGTCTCCCGCGTGACAGGCGGGGATACTCACCACTATACTACCGAGGA
phaw_30.0018242	12811-12881	RF00005	tRNA	Gene	tRNA	CATCGGTGGTTCAGTGGTAGAATTCTCGCCTGCCACGCGGGAGGCCCGGGTTCGATTCCCGGCCGATGCA
phaw_30.0018242	13222-13294	RF00005	tRNA	Gene	tRNA	GTTTCCGCCCGGGATCGAACCGGGGACCTTGCGCGTGTGAGGCGCACGTGATAACCACTACACTACGGAAAC
phaw_30.0018242	34340-34426	RF00005	tRNA	Gene	tRNA	CTTCGATAGCTCAGTTGGTAGAGCGGTGGACTGTAGAGGTGATAACAGTTATCCATAGGTCACTGGTTCGAATCCGGTTCGAAGGA
phaw_30.0018242	43161-43233	RF00005	tRNA	Gene	tRNA	GACCTTGCCAGGGGTCGAACCTGGAATCTTCCGCTCCGTAGGCGGACGCGTTATCCATTGCGCCACAAGGCC
phaw_30.0018242	43730-43802	RF00005	tRNA	Gene	tRNA	GCCTTGTGGCGCAATGGATAACGCGTCCGCCTACGGAGCGGAAGATTCCAGGTTCGACCCCTGGCAAGGTCG
phaw_30.0018242	43953-44031	RF00005	tRNA	Gene	tRNA	GACCTTGCCAGGGGTCGAACCTGGAATCTTCCGCTCCGTAGGCGGACGCGTATACGTTATCCATTGCGCCAAAAAGTC
phaw_30.0018549	6373-6444	RF00005	tRNA	Gene	tRNA	CGCCGCTGGTGTAGTGGTTAGCATGCAAGATTCCCAATCTTGCGAGTCGGGTTCGATTCCCGGGCGGCGCA
phaw_30.0018573	12940-13012	RF00005	tRNA	Gene	tRNA	ATCCTCAACGGGATTCGAACCCGCGGCCTCTGGATTAGAAGTCCAGCGCGCTATCCACTGCGCCATGAGGAC
phaw_30.0018587	27770-27826	RF00005	tRNA	Gene	tRNA	GCACCCGCAATCCCTGGCTTAGGAGGCCAATGCCTTATCCATTAGGCCACGGAGGC
phaw_30.0018719	97322-97393	RF00005	tRNA	Gene	tRNA	GGGGTGTAACTCAGTGGTAGAGTGTTCGCTTTGCATGCGAAAAGCCCCGGGTTCGATCCCCGGCACCTCCA
phaw_30.0018782	89680-89753	RF00005	tRNA	Gene	tRNA	GGCCAGTATGGGGATCGAACCCACGACATCCGCGTTATTAGCACGGCGCTCTAACCAACTGAGCTAACCGGCC
phaw_30.0019099	42374-42446	RF00005	tRNA	Gene	tRNA	CCTTCATAGCTCAGGGGTTAGAGCGCTGGTCTAGTAAACCAGAGGCCGGGAGTTCGATTCTCCCTGAAGGCA
phaw_30.0019200	27523-27595	RF00005	tRNA	Gene	tRNA	GCCCGAACAGGGACTCGAACCCTGGACCCTCAGGTTAAAAGCCTGATGCTCTACCGACTGAGCCATCCGGGC
phaw_30.0019468	11927-11998	RF00005	tRNA	Gene	tRNA	GCCCCATGGCGCAATGGTAGCGCGTCTGACTCCAGATCAGAAGGTTGGGTGTTCGAGTCACTCTGGGGTCA
phaw_30.0019530	42898-42970	RF00005	tRNA	Gene	tRNA	GACCGTGACAGGACTCGAACCTGCAATCTTCGGATCCGAAGTCCGACGCCTTATCCATTAGGCCACACGGCC
phaw_30.0020023	19759-19831	RF00005	tRNA	Gene	tRNA	CCCGGCTAGCTCAGTCGGTAGAGCACGAGACTCTTTATCCCGAGGTCGTGGGTCCGTCCCCCATGTTGGGCG
phaw_30.0020032	22578-22650	RF00005	tRNA	Gene	tRNA	GACCATGACAGGACTCGAACCTGCAATCTTCGGATCCGAAGTCCGACGCCTTATCCATTAGGCCACATGGTC
phaw_30.0020062	38885-38966	RF00005	tRNA	Gene	tRNA	GGCAGCGGTGGGATTCGAACCCACGCCTCCGAAGAGACTGGTGCCTTAAACCAGCGCCTTAGACCGCTCGGCCACGCTACC
phaw_30.0020062	39558-39639	RF00005	tRNA	Gene	tRNA	GGCAGCGGTGGGATTCGAACCCACGCCTCCGAAGAGACTGGTGCCTTAAACCAGCGCCTTAGACCGCTCGGCCACGCTACC
phaw_30.0020663	65936-66008	RF00005	tRNA	Gene	tRNA	CCTCCATAGCTCAGTGGTTAGAGCACTGGTCTTGTAAACCAGGGGTCGGGAGTTCAATTCTCCCTGGGGGCA
phaw_30.0020702	17818-17890	RF00005	tRNA	Gene	tRNA	GCCCCCAGGGAGAATTGAACTCCCGACCCCTGGTTTACAAGACCAGTGCTCTAACCACTGAGCTATGGAGGC
phaw_30.0020752	12130-12202	RF00005	tRNA	Gene	tRNA	CCCGGCTAGCTCAGTCGGTAGAGCACGAGACTCTTAATCTCGGGGTCGTGGGTTCGAGCCCCACGTTGGGCG
phaw_30.0020954	17627-17698	RF00005	tRNA	Gene	tRNA	CCTCGGTAGTATAGTGGTGAGTATCCCCGCCTGTCACGCGGGAGACCGGGGTTCGATTCCCCGCCGGGGAG
phaw_30.0021167	1711-1782	RF00005	tRNA	Gene	tRNA	TCCCCGGCGGGGAATCGAACCCCGGTCTCCCGCGTGACAGGCGGGGATACTCACCACTATACTACCGAGGA
phaw_30.0021357	17800-17871	RF00005	tRNA	Gene	tRNA	GGGGTGTAACTCAGTGGTAGAGTGTTCGCTTTGCATGCGAAAAGCCCCGGGTTCGATCCCCGGCACCTCCA
phaw_30.0021357	17968-18039	RF00005	tRNA	Gene	tRNA	GGAGGTGCCGGGGATCGAACCCGGGGCTTTTCGCATGCAAAGCGAACACTCTACCACTGAGTTACACCCCC
phaw_30.0021379	48484-48554	RF00005	tRNA	Gene	tRNA	GCCGTAACCAGGATTCGAACCTGGGTTATTGCCGCCACAATGCAATGCACTAACGCTGTACGATCATGGC
phaw_30.0021613	40257-40338	RF00005	tRNA	Gene	tRNA	GACGAGGATGGGATTCGAACCCACGCACGGAGACCGTATTGGATTAGCAGTCCAACGCCTTAACCACTCGGCCACCTCGCC
phaw_30.0021649	43148-43221	RF00005	tRNA	Gene	tRNA	GGCCAGTATGGGGAACGAACCCACGACATCCGCGTTATCAGCACGGCGCTCTAACCAACTGAGCTAACCGGCC
phaw_30.0021735	33781-33854	RF00005	tRNA	Gene	tRNA	GGCCAGTATGGGGATCGAATTCACGACATCCGCGTTATCAGCAAGGCGCTCCAGCCGACTGAGCTAACCGGCC
phaw_30.0021822	20287-20358	RF00005	tRNA	Gene	tRNA	NNCGTGACCAGGATTCGAACCTGGGTTATTGCGGCCACAACGCAATGTACTAACCACTATACGATCACGGC
phaw_30.0021822	48081-48153	RF00005	tRNA	Gene	tRNA	GCCTTGTGGCGCAATGGATAACGCGTCCGCCTACGGAGCGGAAGATTCCAGGTTCGACCCCTGGCAAGGTCG
phaw_30.0021822	50422-50493	RF00005	tRNA	Gene	tRNA	GCGATGGCCGGGAATCGAACCCGGGTCAACTGCTTGGAAGGCAGCTATGCTCACCACTATACCACCATCGC
phaw_30.0021822	65124-65195	RF00005	tRNA	Gene	tRNA	GCCCTATGGCGCAATGGTAGCGCGTCTGACTCCAGATCAGAAGGTTGGGTGTTCGAGTCACTCTGGGGTCA
phaw_30.0021903	40148-40219	RF00005	tRNA	Gene	tRNA	CCTCTATAGCTCAGTGGCAGAGCACTGGTCTTGTAAACCAGGGGTCGTGAGTTCAAACCTCACTGGGGGCA
phaw_30.0022166	14748-14820	RF00005	tRNA	Gene	tRNA	GTGCTTACCTGGGCTCGAACCAGGGACCTTCTGTGTGTTAGACAGACGTGATAACCACTACACCATAAGCAC
phaw_30.0022166	21166-21238	RF00005	tRNA	Gene	tRNA	TGCTTATGGTGTAGTGGTTATCACGTCTGTCTTACATACAGAGGGTCTCTGGTTTGAGCCCAGGTAAGCACA
phaw_30.0022166	21597-21669	RF00005	tRNA	Gene	tRNA	TGCTTATGGTGTAGTGGTTATCACGTCTGTCTAACACACAGAAGGTCCCTGGTTCGAGCCCAGGTAAGCACA
phaw_30.0022166	22369-22441	RF00005	tRNA	Gene	tRNA	TGCTTATGGTGTAGTGGTTATCACGTCTGTCTTACACACAGAAGGTCCCTGGTTCGAGCCCAGGTAAGCACA
phaw_30.0022166	22799-22871	RF00005	tRNA	Gene	tRNA	TGCTTATGGTGTAGTGGTTATCACGTCTGTCTTACACACAGAAGGTCCCTGGTTCGAGCCCAGGTAAGCACA
phaw_30.0022166	23228-23300	RF00005	tRNA	Gene	tRNA	TGCTTATGGTGTAGTGGTTATCACGTCTGTCTTACACACAGAAGGTCCCTGGTTCGAGCCCAGGTAAGCACA
phaw_30.0022166	28110-28182	RF00005	tRNA	Gene	tRNA	TGCTTATGGTGTAGTGGTTATCACGTCTGTCTAACACACAGAAGGTCCCTCGTTCAAGCCCAGGTAAGCACA
phaw_30.0022345	759-830	RF00005	tRNA	Gene	tRNA	CGATGGTGGTATAGTGGTGAGCATAGCTGCCTTCCAAGCAGTTGACCCGGGTTCGATTCCCGGCCATCGCA
phaw_30.0022345	3305-3377	RF00005	tRNA	Gene	tRNA	GACCTTGCCAGGGGTCGAACCTGGAATCTTCCGCTCCGTAGGCGGACGCGTTATCCATTGCGCCACAAGGCC
phaw_30.0022345	25038-25109	RF00005	tRNA	Gene	tRNA	CCGTGATCGTATAGTGGTTAGTACATTGCGTTGTGGCCGCAATAACCCAGGTTCGAATCCTGGTCACGNNN
phaw_30.0022352	26926-26998	RF00005	tRNA	Gene	tRNA	CCCGGCTAGCTCAGTCGGTAGAGCACGAGACTCTTAATCTCGGGGTCGTGGGTTCGAGCCCCACGTTGGGCG
phaw_30.0022585	4027-4098	RF00005	tRNA	Gene	tRNA	GCCCTATGGCGCAATGGTAGCGCGTCTGACTCCAGATCAGAAGGTTGGGTGTTCGAGTCACTCTGGGGTCA
phaw_30.0022585	6574-6646	RF00005	tRNA	Gene	tRNA	GGGCTGTAGCTCAAATGGTAGAGCGCTCGCTTAGCATGCGAGAGGTACGGGGATCGATGCCCCGCAGCTCCA
phaw_30.0022585	19488-19559	RF00005	tRNA	Gene	tRNA	GTTCTATGGTGTAATGGTTAGCACTTTGGACTCTGAATCCAACAATCCGAGTTCGAGTCTCGGTAGAACCT
phaw_30.0022591	11196-11269	RF00005	tRNA	Gene	tRNA	GGCCAGTATGGGGAACGAACCCACGACATTCGCGTTATCAGCACGGCGCTCTAACCGACTGAGCTAACCGGCC
phaw_30.0022696	26935-27018	RF00005	tRNA	Gene	tRNA	GTCAGGAGTGGGATTCGAACCCACGCCTGGAGAACCAGACTGCGACCTGAACGCAGCGCCTTAGACCGCTCGGCCATCCTGAC
phaw_30.0022823	17906-17978	RF00005	tRNA	Gene	tRNA	GTGCTTACCTGGGCTCGAACCAGGGACCTTCTGTGTGTTAGACAGACGTGATAACCACTACACCATAAGCAC
phaw_30.0022823	18195-18267	RF00005	tRNA	Gene	tRNA	ATGTTTACCTAGGGTCAAACCAGGGATCATCTGTGTCTTAGACAGATGTTATAACCACTACACCATAAGCAC
phaw_30.0022823	19192-19264	RF00005	tRNA	Gene	tRNA	GTGCTTACCTGGGCTCGAACCAGGGACCTTCTGTGTGTAAGACAGACGTGATAACCACTACACCATAAGCAC
phaw_30.0022823	27095-27167	RF00005	tRNA	Gene	tRNA	TGCTTATGGTGTAGTGGTTATCACGTCTGTCTAACACACAGAAGGTCCCTGGTTCGAGCCCAGGTAAGCACA
phaw_30.0022823	28658-28730	RF00005	tRNA	Gene	tRNA	TGCTTATGGTGTAGTGGTTATCACGTCTGTCTAACACACAGAAGGTCCCTGGTTCGAGCCCAGGTAAGCACA
phaw_30.0022823	35189-35261	RF00005	tRNA	Gene	tRNA	TGCTTATGGTGTAGTGGTTATCACGTCTGTCTAACACACAGAAGGTCCCTGGTTCGAGCCCAGGTAAGCACA
phaw_30.0023139	5125-5197	RF00005	tRNA	Gene	tRNA	ATCCCGTGCAGGATTCGAACCTGCGACTCCCCGTATTTATGACGGGCGCCCTAACCAACGAGCTAACAGGCA
phaw_30.0023333	11-126	RF00005	tRNA	Gene	tRNA	GTCAGAAGTGGGATTCGAACCCACGCCCTCCTGAGAGGACCAGAACGCCCAATATCTCTCAGTGAGAGACAAGTTGCCTTGAGTCTGGCGCCTTAGACCACTCGGCCATCCTGAC
phaw_30.0023427	5495-5566	RF00005	tRNA	Gene	tRNA	GCGATGGCCGGGAATCGAACCCGGGTCAACTGCTTGGAAGGCAGCTATGCTCACCACTATACCACCATCGC
phaw_30.0023427	6075-6146	RF00005	tRNA	Gene	tRNA	CGATGGTGGTATAGTGGTGAGCATAGCTGCCTTCCAAGCAGTTGACCCGGGTTCGATTCCCGGCCATCGCA
phaw_30.0023470	33460-33533	RF00005	tRNA	Gene	tRNA	GGCCAGTACGAGGATCGAACCCACGACATTCGCGTTATCTGCACGGCGCTCTAACCGACTGAGCTAACCTGCC
phaw_30.0023844	5580-5663	RF00005	tRNA	Gene	tRNA	CTTCGATAGCTCAGTTGGTAGAGCGGTGGACTGTAGCGGCTTCAGCTATCCATAGGTCACTGGTTCGAATCCGGTTCGAAGGA
phaw_30.0023844	23820-23891	RF00005	tRNA	Gene	tRNA	CCCGTGTGGTCTAGTGGCTAGGATACGCGGCTCTCACCCGCGAGGCCCGGGTTCGATTCCCGGCACGGGAA
phaw_30.0023932	11392-11473	RF00005	tRNA	Gene	tRNA	GTAGCGTGGCCGAGCGGTCTAAGGCGCTGGTTTAAGGCACCAGTCTCTTCGGAGGCGTGGGTTCGAATCCCACCGCTGCCA
phaw_30.0024025	25911-25999	RF00005	tRNA	Gene	tRNA	GCCCCAGGTGAGGCTCGAACTCACAACCTCGGCATAGCTCAATACTGTCGTATAAGTACCGCGCGCTAACCGATTGCGCCACTGGGGC
phaw_30.0024072	24926-25000	RF00005	tRNA	Gene	tRNA	GGCCATTATTTAGATCGACTCACGATATATCCGCGTTATCAGCACGGTGCTCTAACCGACTGAGCTAACCGGCC
phaw_30.0024251	33041-33112	RF00005	tRNA	Gene	tRNA	GTTCTATGGTGTAATGGTTAGCACTCTGGACTTTGAATCCAGCGATCCGAGTTCGAGTCTCGGTAGAACCT
phaw_30.0024251	34197-34268	RF00005	tRNA	Gene	tRNA	GACCCCAGAGTGACTCGAACACCCAACCTTCTGATCTGGAGTCAGACGCGCTACCATTGCGCCATAGGGCC
phaw_30.0024251	35382-35453	RF00005	tRNA	Gene	tRNA	GCCCTATGGCGCAATGGTAGCGCGTCTGACTCCAGATCAGAAGGTTGGGTGTTCGAGTCACTCTGGGGTCA
phaw_30.0024355	12448-12520	RF00005	tRNA	Gene	tRNA	CCTCGGTAGCGCAGTAGGCAGCGCGTCAGTCTCATAATCTGAAGGTCGTGAGTTCGATCCTCACTCGGGGCA
phaw_30.0024447	24963-25033	RF00005	tRNA	Gene	tRNA	CATCGGTGGTTCAGTGGTAGAATTCTCGCCTGCCACGCGGGAGGCCCGGGTTCGATTCCCGGCCGATGCA
phaw_30.0024559	24550-24621	RF00005	tRNA	Gene	tRNA	CGATGGTGGTATAGTGGTGAGCATAGCTACCTTCCAAGTAGTTGACCTGGATTTGGTTCTCGGCCATCGCA
phaw_30.0024559	24634-24707	RF00005	tRNA	Gene	tRNA	CCTACGTGGCGCAATCTTTTAGCGCGTTCGGCTGTTAACCGAAAGGTTGGTGGTTCGGGCCCACCCGGGGGCG
phaw_30.0025176	5736-5817	RF00005	tRNA	Gene	tRNA	GGCAGCGGTGGGATTCGAACCCACGCCTCCGAAGAGACTGGTGCCTTAAACCAGCGCCTTAGACCGCTCGGCCACGCTACC
phaw_30.0025176	6445-6526	RF00005	tRNA	Gene	tRNA	GGCAGCGGTGGGATTCGAACCCACGCCTCCGAAGAGACTGGTGCCTTAAACCAGCGCCTTAGACCGCTCGGCCACGCTACC
phaw_30.0025258	35672-35744	RF00005	tRNA	Gene	tRNA	GGAGCTGCGGGGTATCGATCCCCGTACCTCTCGCATGCTAAGCGAGCGCTCTACCATTTGAGCTACAGCCCC
phaw_30.0025258	36626-36698	RF00005	tRNA	Gene	tRNA	GGAGCTGCGGGGTATCGATCCCCGTACCTCTCGCATGCTAAGCGAGCGCTCTACCATTTGAGCTACAGCCCC
phaw_30.0025285	26410-26481	RF00005	tRNA	Gene	tRNA	CCTCGGTAGTATAGTGGTGAGTATCCCCGCCTGTCACGCGGGAGACCGGGGTTCGATTCCCCGCCGGGGAG
phaw_30.0025350	22382-22454	RF00005	tRNA	Gene	tRNA	GCCTGTTAGCTCAGGGGCAGAGCACTCGATCGGATTTACGAGAGGTCGCAGGTTCGAGTCCTGCACAGGCTA
phaw_30.0025531	1896-1967	RF00005	tRNA	Gene	tRNA	CCCATGTGGTCTAGTGGCTAGGATACCTGGCTTTCACCCAGGAGGCCCGGGTTCGATTCCCGGCATGGGAA
phaw_30.0026395	4153-4236	RF00005	tRNA	Gene	tRNA	TGAGGATGTCCGAGCGGTCTAAGGTGCTGCGTTCAGGTCGCAGTATGGTTCTCCAGGCGTGGGTTCGAATCCCACTCCTGACA
phaw_30.0026424	1061-1134	RF00005	tRNA	Gene	tRNA	GGCCAGTATGGGGAACGAACCCACGACATCCGCGTTATCAGCACGGCGCTCTAACCGACTGAGCTAACCGGCT
phaw_30.0026445	16068-16141	RF00005	tRNA	Gene	tRNA	CCTTCGAACCGGTGACCTATGGATAGCTGATAACCACTACAGTCCACCGCTCTACCAACTGAGCTATCGAAGG
phaw_30.0026445	17702-17774	RF00005	tRNA	Gene	tRNA	GCCTTGTGGCGCAATGGATAACGCGTCCGCCTACGGAGCGGAAGATTCCAGGTTCGACCCCTGGCAAGGTCG
phaw_30.0026615	5011-5082	RF00005	tRNA	Gene	tRNA	GGCTTGACCGGGATTTGAACCCGGGACCTCTCGCACCCTAAGCGAGAATCATACCCCTAGACCATCAAGCC
phaw_30.0026615	19252-19323	RF00005	tRNA	Gene	tRNA	CCTCGGTAGTATAGTGGTGAGTATCCCCGCCTGTCACGCGGGAGACCGGGGTTCGATTCCCCGCCGGGGAG
phaw_30.0026615	21997-22069	RF00005	tRNA	Gene	tRNA	TTTCCGTAGTGTAGTGGTTATCACGTGCGCCTCACACGCGCAAGGTCCCCGGTTCGATCCCGGGCAGAAACA
phaw_30.0026615	25850-25921	RF00005	tRNA	Gene	tRNA	CCTCGGTAGTATAGTGGTGAGTATCCCCGCCTGTCACGCGGGAGACCGGGGTTTGATTCCCCGCCGGGGAG
phaw_30.0026615	31367-31438	RF00005	tRNA	Gene	tRNA	GGTTCTACCGAGACTCGAACTCGGATCGCTGGATTCAAAGTCCAGAGTGCTAACCATTACACCATAGAACC
phaw_30.0026615	34536-34607	RF00005	tRNA	Gene	tRNA	GGCTTGACCGGGATTTGAACCCGGGACCTCTCGCACCCAAAGCGAGAATCATACCCCTAGACCATCAAGCC
phaw_30.0026615	34866-34936	RF00005	tRNA	Gene	tRNA	GCATCGGCCGGGAATCGAACCCGGGCCTCCCGCGTGGCAGGCGAGAATTCTACCACTGAACCACCGATGC
phaw_30.0026615	38479-38550	RF00005	tRNA	Gene	tRNA	TCCCCGGCGGGGAATCGAACCCCGGTCTCCCGCGTGACAGGCGGGGATACTCACCACTATACTACCGAGGA
phaw_30.0026615	38900-38972	RF00005	tRNA	Gene	tRNA	GTTTCCGCCCGGGATCGAACCGGGGACCTTGCGCGTGTGAGGCGCACGTGATAACCACTACACTACGGAAAC
phaw_30.0026615	40455-40526	RF00005	tRNA	Gene	tRNA	TCCCCGGCGGGGAATCGAACCCCGGTCTCCCGCGTGACAGGCGGGGATACTCACCACTATACTACCGAGGA
phaw_30.0026615	43098-43170	RF00005	tRNA	Gene	tRNA	GTTTCCGCCCGGGATCGAACCGGGGACCTTGCGCGTGTGAGGCGCACGTGATAACCACTACACTACGGAAAC
phaw_30.0026935	16075-16147	RF00005	tRNA	Gene	tRNA	CCCGGCTAGCTCAGTCGGTAGAGCACGAGACTCTTAATCTCGGGGTCGTGGGTTCGAGCCCCACGTTGGGCG
phaw_30.0026935	16401-16473	RF00005	tRNA	Gene	tRNA	CCCGGCTAGCTCAGTCGGTAGAGCACGAGACCCTTAATCTCGGGGTCGTGGGTTCGAGCCCCACGATGGGCG
phaw_30.0026935	22134-22206	RF00005	tRNA	Gene	tRNA	CCCGGCTAGCTCAGTCGGTAGAGCACGAGACTCTTAATCTCGGGGTCGTGGGTTCGAGCCCCACGTTGGGCG
phaw_30.0027181	6423-6495	RF00005	tRNA	Gene	tRNA	ACCTCCGGCGGGACTCGAACCCGCAATCCCTGGCTTAGGAGGCCAATGCCTTATCCATTAGGCCACGGAGGC
phaw_30.0027311	16083-16154	RF00005	tRNA	Gene	tRNA	TCCCCGGCGGGGAATCGAACCCCGGTCTCCCGCGTGACAGGCGGGGATACTCACCACTATACTACCGAGGA
phaw_30.0027311	16536-16606	RF00005	tRNA	Gene	tRNA	CATCGGTGGTTCAGTGGTAGAATTCTCGCCTGCCACGCGGGAGGCCCGGGTTCGATTCCCGGCCGATGCA
phaw_30.0027311	16939-17011	RF00005	tRNA	Gene	tRNA	GTTTCCGCCCGGGATCGAACCGGGGACCTTGCGCGTGTGAGGCGCACGTGATAACCACTACACTACGGAAAC
phaw_30.0027486	2799-2870	RF00005	tRNA	Gene	tRNA	TCTCGTGCCGGGAATCGAACCCGGGCCTCGCGGGTGAGAGCCGCGTATCCTAGCCACTAGACCACACGGGA
phaw_30.0027535	10309-10381	RF00005	tRNA	Gene	tRNA	GCCGTGTGGCCTAATGGATAAGGCGTCGGACTTCGGATCCGAAGATTGCAGGTTCGAGTCCTGTCACGGTCG
phaw_30.0027593	85623-85694	RF00005	tRNA	Gene	tRNA	CCCATGTGGTCTAGTGGCTAGGATACCTGGCTTTCACCCAGGAGGCCCGGGTTCGATTCCCGGCATGGGAA
phaw_30.0027829	2230-2303	RF00005	tRNA	Gene	tRNA	GCCGGTTAGCTCAGTCGGTTAGAGCGCCGTGCTGATAACGCGGATGTCGTGGGTTCGATCCCCATACTAGCCA
phaw_30.0028269	29747-29818	RF00005	tRNA	Gene	tRNA	GGCCTGTCCGGGATTTGAACCCGGGACCTCTCGCACCCAAAGCGAGAATCATACCCCTAGACCAACAGGCC
phaw_30.0028269	40204-40274	RF00005	tRNA	Gene	tRNA	GCATCGGCCGGGAATCGAACCCGGGCCTCCCGCGTGGCAGGCGAGAATTCTACCACTGAACCACCGATGC
phaw_30.0028269	42388-42458	RF00005	tRNA	Gene	tRNA	CATCGGTGGTTCAGTGGTAGAATTCTCGCCTGCCACGCGGGAGGCCCGGGTTCGATTCCCGGCCGATGCA
phaw_30.0028303	24512-24584	RF00005	tRNA	Gene	tRNA	GACCGTGACAGGACTCGAACCTGCAATCTTCGGATCCGAAGTCCGACGCCTTATCCATTAGGCCACACGGCC
phaw_30.0028611	8030-8102	RF00005	tRNA	Gene	tRNA	CCTAGATAGCTCAGTTGGGAGAGCGTTAGACTGAAGATCTAAAGGTCCCCGGTTCGATCCCGGGTCTGGGCA
phaw_30.0028611	8180-8251	RF00005	tRNA	Gene	tRNA	AGCAGAGCGTGGTTTCGATCCACGGACCTCTGGGTTATGGGCCCAGCACGCTTCCTCTGCGCCACTCTGCT
phaw_30.0028611	13686-13757	RF00005	tRNA	Gene	tRNA	AGCAGAGCGTGGTTTCGATCCACGGACCTCTGGGTTATGGGCCTAGCACGCTTCCTCTGCGCCACTCTGCT
phaw_30.0028611	24254-24326	RF00005	tRNA	Gene	tRNA	GCTCACACCCGGGATCGAACCGGGGACCTTCAGATCTTCAGTCTGACGCCCTCCCAACTGAGCTATCTACGC
phaw_30.0028611	25978-26049	RF00005	tRNA	Gene	tRNA	CGATGGTGGTATAGTGGTGAGCATAGCTGCCTTCCAAGCAGTTGACCCGGGTTCGATTCCCGGCCATCGCA
phaw_30.0028611	37566-37637	RF00005	tRNA	Gene	tRNA	GCAGAGTGGCGCAGAGGAAGCGTGCTGGGCCCATAACCCAGAGGTCCGTGGATCGAAACCACGCTCTGCTA
phaw_30.0028611	39298-39369	RF00005	tRNA	Gene	tRNA	CGATGGTGGTATAGTGGTGAGCATAGCTGCCTTCCAAGCAGTTGACCCGGGTTCGATTCCCGGCCATCGCA
phaw_30.0028611	47829-47901	RF00005	tRNA	Gene	tRNA	GCCCAGACCCGGGATCGAACCGGGGACCTTTAGATCTTCAGTCTAACGCTCTCCCAACTGAGCTATCTAGGC
phaw_30.0028611	48097-48169	RF00005	tRNA	Gene	tRNA	GCCCAGACCCGGGATCGGACCGGGGACCTTTAGATCTTCAGTCTAACGCTCTCCCAACTGAGCTATCTAGGC
phaw_30.0028980	15222-15294	RF00005	tRNA	Gene	tRNA	ACCATGTGGCCTAATGGATAAGGCGTCGGACTTCGGATCCGAAGATTGCAGGTTCGAGTCCTGTCATGGTCG
phaw_30.0028980	19280-19352	RF00005	tRNA	Gene	tRNA	ACCATGTGGCCTAATGGATAAGGCGTCGGACTTCGGATCCGAAGATTGCAGGTTCGAGTCCTGTCATGGTCG
phaw_30.0029262	13273-13344	RF00005	tRNA	Gene	tRNA	TCCCGTGCCGGGAATCGAACCCGGGCCTCGCGGGTGAGAGCCGCGTATCCTAGCCACTAGACCACACGGGA
phaw_30.0029262	31468-31551	RF00005	tRNA	Gene	tRNA	CCTTCGAACCGGATTCGAACCAGTGACCTATGGATAGCTGAAGCCTCTACAGTCCACCGCTCTACCAACTGAGCTATCGAAGG
phaw_30.0029499	23044-23111	RF00005	tRNA	Gene	tRNA	GTAATAGCTCAGTCGGTTAGAGCGCCGTGCTGATAACGCGGATGTCGTGGGTTCGTTCCCCATACTG
phaw_30.0029645	9633-9707	RF00005	tRNA	Gene	tRNA	CCCCTGGCGGGGTATCGAACCCCGGTCTCCCGCGTGACAGGCGGGGAGAGGACTCACCACTATACTACCGAGGA
phaw_30.0029929	909-979	RF00005	tRNA	Gene	tRNA	CATCGGTGGTTCAGTTTTAGAATTCTCGCCTGCCACGCGGGAGGCCCGGGTTCGATTCCCGGCCGATGCA
phaw_30.0029929	9272-9342	RF00005	tRNA	Gene	tRNA	GCATCGGCCGGGAATCGAACCCGGGCCTCCCGCGTGGCAGGCGAGAATTCTACCACTGAACCACCGATGC
phaw_30.0029929	11162-11232	RF00005	tRNA	Gene	tRNA	GCATCGGCCGGGAATCGAACCCGGGCCTCCCGCGTGGCAGGCGAGAATTCTACCACTGAACCACCGATGC
phaw_30.0029929	11491-11561	RF00005	tRNA	Gene	tRNA	CATCGGTGGTTCAGTGGTAGAATTCTCGCCTGCCACGCGGGAGGCCCGGGTTCGATTCCCGGCCGATGCA
phaw_30.0029929	22268-22339	RF00005	tRNA	Gene	tRNA	GCCTGTTGGTCTAGGGGTATGATTCTCGCTTTGGGTGCGAGAGGTCCCGGGTTCAAATCCCGGACAGGCCC
phaw_30.0029983	6925-6997	RF00005	tRNA	Gene	tRNA	GCCCGAACAGGGACTCGAACCCTGGACCCTCAGGTTAAAAGCCTGATGCTCTACCGACTGAGCCATCCGGGC
phaw_30.0030251	16949-17020	RF00005	tRNA	Gene	tRNA	TCCCCGGCGGGGAATCGAACCCCGGTCTCCCGCGTGACAGGCGGGGATACTCACCACTATACTACCGAGGA
phaw_30.0030413	38355-38428	RF00005	tRNA	Gene	tRNA	TCTTGTTAGCTCAGTTGGTTAGAGCGTCGTGCTGATAACGCTGATGTCGTGGGTTCGATCCTCATATGGGCCA
phaw_30.0030431	18949-19020	RF00005	tRNA	Gene	tRNA	GCCGCCAGAGAGAATCGAACTCTCGACCCCTAGTTTACGAGACTAGTGCTCTGCCCCTGAGCTATGGCGGC
phaw_30.0030680	25002-25083	RF00005	tRNA	Gene	tRNA	CTGTGGTGTCCGAGTGGTTAAGGAGATGGACTAGAAATCCATTGGGCTCTGCCCGCACAGGTTCGAATCCTGTCTACAGCG
phaw_30.0030690	3810-3881	RF00005	tRNA	Gene	tRNA	CCCATGTGGTCTAGTGGCTAGGATACCTGGCTTTCACCCAGGAGGCCCGGGTTCGATTCCCGGCATGGGAA
phaw_30.0030961	3185-3255	RF00005	tRNA	Gene	tRNA	CATCGGTGGTTCAGTGGTAGAATTCTCGCCTGCCACGCGGGAGGCCCGGGTTCGATTCCCGGCCGATGCA
phaw_30.0030965	20439-20510	RF00005	tRNA	Gene	tRNA	GCTTGATGGTCTAGGGGTATGATTCTCGCTTTGGGTGCGAGAGGTCCCGGGTTTAAATCCCGGTCAAGCCC
phaw_30.0030991	7638-7711	RF00005	tRNA	Gene	tRNA	GGCCAGTATGGGGATCGAACCCACGACATCCGCGTTATTAGCACGGCGCTCTAACCGACTGAGCTAACCGGCC
phaw_30.0031269	11087-11158	RF00005	tRNA	Gene	tRNA	CCCATGTGGTCTAGTGGCTAGGATACCTGGCTTTCACCCAGGAGGCCCGGGTTCGATTCCCGGCATGGGAA
phaw_30.0031269	13389-13460	RF00005	tRNA	Gene	tRNA	CCCATGTGGTCTAGTGGCTAGGATACCTGGCTTTCACCCAGGAGGCCCGGGTTCGATTCCCGGCATGGGAA
phaw_30.0031809	12338-12416	RF00005	tRNA	Gene	tRNA	AGCCTGTGCAAGGTTCGAACTTGCGACCTCCAGCTTGTTTACGGAACGGCTGGTGCTCTGCCACTGAGCTAACAGGCA
phaw_30.0031809	16452-16529	RF00005	tRNA	Gene	tRNA	AGCCTGTACAAGGTTCGAACTTGCGACCTCCAGCTTGTTCACGAAAGGCTGGTGCTCTGCCACTGAGCTAACAGGCA
phaw_30.0031809	18736-18822	RF00005	tRNA	Gene	tRNA	AGCCTGTACAAGGATCGAACTTGTGACCCCCAGCGAATATTTGACTGAGTCAGCCAGCTGGTGCTCTGCCACTGAGCTAACAGACA
phaw_30.0031809	24283-24360	RF00005	tRNA	Gene	tRNA	AGCCTGTGCTAGCTTCGAACTTGCGATCTCCTGCTTGTTGACGAGAGGCTGGTGCTCAGCCACTGAGCTAACAGGCT
phaw_30.0031844	37399-37470	RF00005	tRNA	Gene	tRNA	GGGGTGTAGCTCAGTGGTAGAGCATTCGACTGCAGATCGAGAGGTCCCCGGTTCAAACCCGGGCGCCCCCT
phaw_30.0031970	9876-9947	RF00005	tRNA	Gene	tRNA	GGGGTGTAACTCAGTGGTAGAGTGTTCGCTTTGCATGCGAAAAGCCCCGGGTTCGATCCCCGGCACCTCCA
phaw_30.0031994	11222-11303	RF00005	tRNA	Gene	tRNA	GGCAGCGGTGGGATTCGAACCCACGCCTCCGAAGAGACTGGTGCCTTAAACCAGCGCCTTAGACCGCTCGGCCACGCTACC
phaw_30.0031994	17506-17578	RF00005	tRNA	Gene	tRNA	GGGCTGTAGCTCAAATGGTAGAGCGCTCGCTTAGCATGCGAGAGGTACGGGGATCGATGCCCCGCAGCTCCA
phaw_30.0032054	22019-22091	RF00005	tRNA	Gene	tRNA	TGCTTATGGTGTAGTGGTTATCACGTCTGTCTAACACACAGAAGGTCCCTGGTTCGAGCCCAGGTAAGCACA
phaw_30.0032310	13039-13111	RF00005	tRNA	Gene	tRNA	GTGCTTACCTGGGCTCGAACCAGGGACCTTCTGTGTGTTAGACAGACGTGATAACCACTACACCATAAGCAC
phaw_30.0032902	8360-8431	RF00005	tRNA	Gene	tRNA	GCCTGTTGGCTCAGCGGTAGAGCACCCGACCGATTTACGGGTTGTCGCAGGTTCGAGTCCTGCACAGGCTA
phaw_30.0033233	21860-21912	RF00005	tRNA	Gene	tRNA	CCCGGCTAGCTCAGTCGGTAGAGCACGAGACTCTTAATCTCGGTGTCGTGCG
phaw_30.0033278	14885-14950	RF00005	tRNA	Gene	tRNA	TCAAAGGGAATCGAACCCCGGTCTCCCGCGTGACAGGCGGGGATACTCACCACTATACTACCGAG
phaw_30.0033555	5173-5245	RF00005	tRNA	Gene	tRNA	AGCCTGTGCAGGAATCGAACCTGCGACAACCCGTAAATCCGTCGGGTGCTCTAACCACTGAGCTAACAGGCA
phaw_30.0033636	9775-9846	RF00005	tRNA	Gene	tRNA	GCTTGATGGTCTAGGGGTATGATTCTCGCTTAGGGTGCGAGAGGTCCCGGGTTCAAATCCCGGTCAAGCCC
phaw_30.0033858	3232-3303	RF00005	tRNA	Gene	tRNA	GCCGTGACCAGGATTCGAACCTGGGTTATTGCGGCCACAACGCAATGTACTAACCACTATACGATCACGGC
phaw_30.0033858	8537-8608	RF00005	tRNA	Gene	tRNA	GCCGTGACCAGGATTCGAACCTGGGTTATTGCGGCCACAACGCAATGTACTAACCACTATACGATCACGGC
phaw_30.0033943	10212-10284	RF00005	tRNA	Gene	tRNA	ATCTCCGACGGGATTCGAACCCGCGGCCTCTGGATTAGAAGTCCAGCGCGCTATCCACTGCGCCACGGAGAC
phaw_30.0033943	21778-21850	RF00005	tRNA	Gene	tRNA	ATCTCCGACGGGATTCGAACCCGCGGCCTCTGGATTAGAAGTCCAGCGCGCTATCCACTGCGCCACGGAGAC
phaw_30.0034050	4916-4988	RF00005	tRNA	Gene	tRNA	GCCCGAACAGGGACTCGAACCCTGGACCCTCAGGTTAAAAGCCTGATGCTCTACCGACTGAGCCATCCGGGC
phaw_30.0034087	2808-2879	RF00005	tRNA	Gene	tRNA	TCCCCGGCGGGGAATCGAACCCCGGTCTCCCGCGTGACAGGCGGGGATACTCACCCCTATACTACCGAGGA
phaw_30.0034087	3486-3557	RF00005	tRNA	Gene	tRNA	CCTCGGTAGTATAGTTGTGAGTATCCCCGCCTGTCACGCGGGAGACCGGGGTTCGATTCCCCGCCGGGGAG
phaw_30.0034125	22191-22263	RF00005	tRNA	Gene	tRNA	GACCTTGCCAGGGGTCGAACCTGGAATCTTCCGCTCCGTAGGCGGACGCGTTATCCATTGCGCCACAAGGCC
phaw_30.0034261	14813-14885	RF00005	tRNA	Gene	tRNA	GCCCGAACAGGGACTCGAACCCTGGACCCTCAGGTTAAAAGCCTGATGCTCTACCGACTGAGCCATCCGGGC
phaw_30.0035189	13705-13777	RF00005	tRNA	Gene	tRNA	CCCGGATGGCTCAGTCGGTAGAGCATCAGGCTTTTAACCTGAGGGTCCAGGGTTCGAGTCCCTGTTCGGGCG
phaw_30.0035189	14879-14951	RF00005	tRNA	Gene	tRNA	ACCCGAACAGGGACTCGAACTTTGAACCCTCAGGTTGAGAAGCTGATGCGATACCGACTGCGCCATCCCGGC
phaw_30.0035288	10325-10396	RF00005	tRNA	Gene	tRNA	TCCCCGGCGGGGAATCGAACCCCGGTCTCCCGCGTGACAGGCGGGGATACTCACCACTATACTACCGAGGA
phaw_30.0035300	3251-3332	RF00005	tRNA	Gene	tRNA	GGCAGCGGTGGGATTCGAACCCACGCCTCCGAAGAGACTGGTGCCTTAAACCAGCGCCTTAGACCGCTCGGCCACGCTACC
phaw_30.0035317	8431-8503	RF00005	tRNA	Gene	tRNA	GCCCGAACAGGGACTCGAACCCTGAACCCTCAGGTTAAAAGCCTGATGCTCTACCGACTGAGCCATCCGGGC
phaw_30.0035349	21248-21310	RF00005	tRNA	Gene	tRNA	TTAGCTCAGTTGGTTAGAGCGCCGTGCTGATAACGCGGATGTCGTGGGTTCGTTCCCCATAC
phaw_30.0036085	12468-12549	RF00005	tRNA	Gene	tRNA	GCTGCGGACAGGATTCGAACCTGTGCGGGCAGAGCCCAATGGATTTCTAGTCCATCTCCTTAACCACTCGGACACCGCAGC
phaw_30.0036898	12697-12768	RF00005	tRNA	Gene	tRNA	GGGGGCGCCCGGGTTTGAACCGGGGACCTCTCGATCTGCAGTCGAATGCTCTACCACTGAGCTACACCCCC
phaw_30.0037157	14480-14552	RF00005	tRNA	Gene	tRNA	GGGCTGTAGCTCAAATGGTAGAGCGCTCGCTTAGCATGCGAGAGGTACGGGGATCGATGCCCCGCAGCTCCA
phaw_30.0037157	14637-14708	RF00005	tRNA	Gene	tRNA	GGTTCTACCGAGACTCGAACTCGGATTGTTGGATTCAGAGTCCAAAGTGCTAACCATTACACCATAGAACC
phaw_30.0037864	7803-7875	RF00005	tRNA	Gene	tRNA	TGCTTATGGTGTAGTGGTTATCACGTCTGTCTAACACACAGAAGGTCCCTGGTTCGAGCCCAGGTAAGCACA
phaw_30.0037961	19457-19527	RF00005	tRNA	Gene	tRNA	CATCGGTGGTTCAGTGGTAGAATTCTCGCCTGCCACGCGGGAGGCCCGGGTTCGATTCCCGGCCGATGCA
phaw_30.0038036	1995-2067	RF00005	tRNA	Gene	tRNA	GCCCAACGTGGGGCTCGAACCCACGACCCCGAGATTAAGAGTCTCGTGCTCTACCGACTGAGCTAGCCAGGC
phaw_30.0038036	2317-2389	RF00005	tRNA	Gene	tRNA	GCCCAACGTGGGGCTCGAACCCACGACCCCGAGATTAAGAGTCTCGTGCTCTACCGACTGAGCTAGCCGGGC
phaw_30.0038036	13913-13985	RF00005	tRNA	Gene	tRNA	CCCGGCTAGCTCAGTAGGTAGAGCACGAGACTCTTAATCTCGGGGTCGTGCGTTTGAGCCCCACGTTGGGCG
phaw_30.0038036	17024-17096	RF00005	tRNA	Gene	tRNA	GCCCAACGTGGGGCTCGAACCCACGACCCCGAGATTAAGAGTCTCGTGCTCTACCGACTAAGCTAGCCGGGC
phaw_30.0038036	17304-17376	RF00005	tRNA	Gene	tRNA	GCCCAACGTGGGGCTCGAACCCACGACCCCGAGATTAAGAGTCTCGTGCTCTACCGACTGAGCTAGCCGGGC
phaw_30.0038036	17584-17656	RF00005	tRNA	Gene	tRNA	GCCCAACGTGGGGCTCGAACCCACGACCCCGAGATTAAGAGTCTCGTGCTCTACTGACTGAGCTAGCCGGGC
phaw_30.0038036	17864-17936	RF00005	tRNA	Gene	tRNA	GCCCAACGTGGGGCTCGAACCCACGACCCCGAGATTAAGAGTCTCGTGCTCTACCGACTGAGCTAGCCGGGC
phaw_30.0038036	26642-26714	RF00005	tRNA	Gene	tRNA	GCCCAACGTGGGGCACGTACCCACGACCCCGAGATTAAGAGTCTCGTGCGTTACCGACTGAGCTAGCCGGGC
phaw_30.0038036	26921-26993	RF00005	tRNA	Gene	tRNA	GCCCAACGTGGGGCTCGAACCCACGACCCCGAGATTAAGAGTCTCGTGCTCTACCGACTGAGCTAGCCGGGC
phaw_30.0038291	20808-20881	RF00005	tRNA	Gene	tRNA	AGCCAGTATGGGGAACGAACCCACGACATTCGCGTTATCAGCACGACGCTCTAACCAACTGAGCTAACCGGCT
phaw_30.0038520	27157-27229	RF00005	tRNA	Gene	tRNA	TCTCCGTGGCGCAGTGGATAGCGCGCTGGACTTCTAATCCAGAGGCCGCGGGTTCGAATCCCGTCGGAGATG
phaw_30.0038923	18796-18877	RF00005	tRNA	Gene	tRNA	GGCAGCGGTGGGATTCGAACCCACGCCTCCGAAGAGACTGGTGCCTTAAACCAGCGCCTTAGACCGCTCGGCCACGCTACC
phaw_30.0040617	10055-10136	RF00005	tRNA	Gene	tRNA	GACGAGGATGAGATTCGAACTCACGCACGGAGACCGTATTGGATTAGCAGTCCAACGCCTTAACCACTCGGCCACCTCGCC
phaw_30.0040617	12027-12098	RF00005	tRNA	Gene	tRNA	CCGTGATCGTATAGTGGTTAGTACATTGCGTTGTGGCCGCAATAACCCAGGTTCGAATCCTGGTCACGGCA
phaw_30.0041424	15105-15177	RF00005	tRNA	Gene	tRNA	GCCCGAACAGGGACTCGAACCCTGGACCCTCAGGTTAAAAGCCTGATGCTCTACCGACTGAGCCATCCGGGC
phaw_30.0042222	9296-9367	RF00005	tRNA	Gene	tRNA	CCCGTGTGGTCTAGTGGCTAGGATACGCGGCTCTCACCCGCGAGGCCCGGGTTCGATTCCCGGCACGGGAA
phaw_30.0042272	8074-8145	RF00005	tRNA	Gene	tRNA	CAATGGTGGTATAGTGGTGAGCATAGCTACCTTCCAAGCAGTTGACCCGGATTCGGTTCCCGGCCATCGCA
phaw_30.0042272	8158-8231	RF00005	tRNA	Gene	tRNA	CCTCCTTGGCGCAATCGGTTAGCACGTTTGGCCGTTAACCGAAAGGTTGGTGGTTCGGGCCCACCCGGGGGTG
phaw_30.0043029	18266-18337	RF00005	tRNA	Gene	tRNA	GTCCTATGGTGTAATGGTTAGCACTTTGGACTCTGAATCCAACAATCCGAGTTCGAGTCTCGGTAGGACCT
phaw_30.0043046	6182-6263	RF00005	tRNA	Gene	tRNA	GCTGCGGACAGGATTCGAACCTGTGCGGGCAGAGCCCAATGGATTTCTAGTCCATCTCCTTAACCACTCGGACACCGCAGC
phaw_30.0043311	38056-38126	RF00005	tRNA	Gene	tRNA	GCGCCGCCCGGGAAGCGAACCCGGGTCGCAAGAATGGGAATCTTGCATGATACCACTACACCAGCGGCGC
phaw_30.0043428	9752-9824	RF00005	tRNA	Gene	tRNA	GTGCTTACCTGGGCTTGAACCAGGGACCTTCTGTGTGTTAGACAGACGTGATAACCACTACACCATAAGCAC
phaw_30.0043428	17481-17553	RF00005	tRNA	Gene	tRNA	GTGCTTACCTGGGCTCGAACCAGGGACCTTCTGTGTGTAAGACAGACGTGATAACCACTACACCATAAGCAC
phaw_30.0043428	17944-18016	RF00005	tRNA	Gene	tRNA	GTGCTTACCTGGGCTCGAACCAGGGACCTTCTGTGTGTAAGACAGACGTGATAACCACTACACCATAAGCAC
phaw_30.0043428	18714-18786	RF00005	tRNA	Gene	tRNA	GTGCTTACCTGGGCTCGAACCAGGGACCTTCTGTGTGTTAGACAGACGTGATAACCACTACACCATAAGCAC
phaw_30.0043428	19146-19218	RF00005	tRNA	Gene	tRNA	GTGCTTACCTGGGCTCGAACCAGGGACCTTCTGTGTGTAAGACAGACGTGATAACCACTACACCATAAGCAC
phaw_30.0043428	25414-25486	RF00005	tRNA	Gene	tRNA	TGCTTATGGTGTAGTGGTTATCACGTCTGTCTAACACACAGAAGGTCCCTGGTTCGAGCCCAGGTAAGCACA
phaw_30.0043428	34626-34698	RF00005	tRNA	Gene	tRNA	TGCTTATGGTGTAGTGGTTATCACGTCTGTCTAACACACAGAAGGTCCCTGGTTCGAGCCCAGGTAAGCACA
phaw_30.0043548	36-108	RF00005	tRNA	Gene	tRNA	GCCCGAACAGGGACTCGAACCCTGGACCCTCAGGTTAAAAGCCTGATGCTCTACCGACTGAGCCATCCGGGC
phaw_30.0043749	11960-12033	RF00005	tRNA	Gene	tRNA	GGCCAGTATGGGGATCGAACCCACGACATCCGCGTTATTAGCACGGCGCTCTAACCAACTGAGCTAACCGGCC
phaw_30.0044164	1268-1340	RF00005	tRNA	Gene	tRNA	CCTAGATAGCTCAGTTGGGAGAGCGTTAGACTGAAGATCTAAAGGTCCCCGGTTCGATCCCGGGTCTGGGCA
phaw_30.0044164	13803-13874	RF00005	tRNA	Gene	tRNA	GCGATGGCCGGGAATCGAACCCGGGTCAACTGCTTGGAAGGCAGCTATGCTCACCACAATACCACCATCGC
phaw_30.0044164	14808-14879	RF00005	tRNA	Gene	tRNA	AGCAGAGCGTGGTTTCGATCCACGGACCTCTGGGTTATGGGCCCAGCACGCTTCCTCTGCGCCACTCTGCT
phaw_30.0044462	170-243	RF00005	tRNA	Gene	tRNA	GGCCAGTATGGGGACCGAACCCACGACATCCGCGTTATCAGCACGGCACTATAACCGACTGAGCTAACCGGCC
phaw_30.0045165	13978-14049	RF00005	tRNA	Gene	tRNA	TCCCATGCCGGGAATCGAACCCGGGCCTCCTGGGTGAAAGCCAGGTATCCTAGCCACTAGACTACATGGGA
phaw_30.0045241	129-201	RF00005	tRNA	Gene	tRNA	GCCCGAACAGGGCCTTGAACCCTGGACCCTCAGGTTAAAAGCCTGATGCTCTACCGACTGAGCCATCCGGGC
phaw_30.0045252	2990-3062	RF00005	tRNA	Gene	tRNA	TTTCCGTAGTGTAGTGGTTATCACGTGCGCCTCACACGCGCAAGGTCCCCGGTTCGATCCCGGGCGGAAACA
phaw_30.0045993	3276-3348	RF00005	tRNA	Gene	tRNA	GCCCAACGTGGGGCTCGAACCCACGACCCCGAGATTAAGAGTCTCGTGCTCTACCGACTGAGCTAGCCGGGC
phaw_30.0046195	8070-8151	RF00005	tRNA	Gene	tRNA	GCAGCGTGGCCGAGTGGTCTAAGGCGCTGGATTTAGGCTCCAGTCTCTCAGGAGGCGTGGGTTCGAATCCCACCGCTGTCA
phaw_30.0046236	2064-2145	RF00005	tRNA	Gene	tRNA	GTAGCGTGGCCGAGTGGTCTAAGGCGCTGGATTTAGGCTCCAGTCTCTCCGGAGGCGTGGGTTCGAATCCCACCGCTGCCA
phaw_30.0046320	7625-7696	RF00005	tRNA	Gene	tRNA	CCGTGATCGTATAGTGGTTAGTACATTGCGTTGTGGCCGCAATAACCCAGGTTCGAATCCTGGTCACGGCA
phaw_30.0047242	25934	RF00005	tRNA	Gene	tRNA	CTCTATAGCTCAGTGGCAGAGCACTGGTCTTGTAAACCAGGGGTCGTGAGTTCAAACCTCACTGGGGGCA
phaw_30.0047242	497-569	RF00005	tRNA	Gene	tRNA	CCTAGATAGCTCAGTTGGGAGAGCGTTAGACTGAAGATCTAAAGGTCCCCGGTTCGATCCCGGGTCTGGGCA
phaw_30.0047273	6471-6542	RF00005	tRNA	Gene	tRNA	GGGGTGTAACTCAGTGGTAGAGTGTTCGCTTTGCATGCGAAAAGCCCCGGGTTCGATCCCCGGCACCTCCA
phaw_30.0047273	6632-6703	RF00005	tRNA	Gene	tRNA	GGAGGTGCCGGGGATCGAACCCGGGGCTTTTCGCATGCAAAGCGAACACTCTACCACTGAGTTACACCCCC
phaw_30.0047273	9367-9438	RF00005	tRNA	Gene	tRNA	GGAGGTGCCGGGGATCGAACCCGGGGCTTTTCGCATGCGAAGCGAACACTCTACCACTGAGTTACACCCCC
phaw_30.0047687	18994	RF00005	tRNA	Gene	tRNA	GGGGACCTTTAGATCTTCAGTCTAACGCTCTCCCAACTGAGCTATCTAGGC
phaw_30.0047687	490-544	RF00005	tRNA	Gene	tRNA	TGAGGTTTGAACTCACGACCCCTGGTTTACAAGACCAGTGCTCTGCCACTGANN
phaw_30.0048206	12756-12827	RF00005	tRNA	Gene	tRNA	GCAGAGTGGCGCAGAGGAAGCGTGCTGGGCCCATAACCCAGAGGTCCGTGGATCGAAACCACGCTCTGCTA
phaw_30.0048206	15589-15660	RF00005	tRNA	Gene	tRNA	GCAGAGTGGCGCAGAGGAAGCGTGCTGGGCCCATAACCCAGAGGTCCGTGGATCGAAACCACGCTCTGCTA
phaw_30.0048320	579-652	RF00005	tRNA	Gene	tRNA	GGCCAGTATGGGGATCGAACCCACGACATCCGCGTTATCAGTACGGCGCTCTAACCGACTGAGCTAACCGGCT
phaw_30.0048555	22680-22752	RF00005	tRNA	Gene	tRNA	GCCCGAACAGGGACTTGAACCCTGGACCCTCAGGTTAAAAGCCTGATGCTCTACCGACTGAGCCATCCGGGC
phaw_30.0048694	6600-6672	RF00005	tRNA	Gene	tRNA	CCTCCGTGGCCCAATGGATAAGGCATCGGCCTCCTAAGCCGAGGATTGCGGGTTCGAGTCCCGCCGGAGGTT
phaw_30.0048878	9376-9462	RF00005	tRNA	Gene	tRNA	CTTCGATAGCTCAGTTGGTAGAGCGGTGGACTGTAGAGGTTATATCGGTTATCCATAGGTCACTGGTTCGAATCCGGTTCGAAGGA
phaw_30.0048900	4525-4595	RF00005	tRNA	Gene	tRNA	GCATCGGCTGGAAATCAAACCCAGGCCTCCTGCGTGGCAGGCGAGAATTCTACCACTGAACCACAGATGC
phaw_30.0048900	6490-6560	RF00005	tRNA	Gene	tRNA	CATCGGTGGTTCAGTGGTAGAATTCTCGCCTGCCACGCGGGAGGCCCGGGTTCGATTCCCGGCCGATGCA
phaw_30.0048900	8131-8202	RF00005	tRNA	Gene	tRNA	TCCCCGGCGGGGAATCGAACCCCGGTCTCCCGCGTGACAGGCGGGGATACTCACCACTATACTACCGAGGA
phaw_30.0049599	741-822	RF00005	tRNA	Gene	tRNA	CTGCGGTGTCCGAGTGGTTAAGGAGATGGACTCGAAATCCATTGGGCTCTGCCCGCATAGGTTCGAATCCTGTCCGCAGCG
phaw_30.0049599	1901-1982	RF00005	tRNA	Gene	tRNA	GCTGCAGACAGGATTCGAACCTGTGCGGGCAGAGCCCAATGGATTTCTAGTCCATCTCCTTAACCACTCGGACACCGCAGC
phaw_30.0049753	7516-7587	RF00005	tRNA	Gene	tRNA	CCCATGTGGTCTAGTGGCTAGGATACCTGGCTTTCACCCAGGAGGCCCGGGTTCGATTCCCGGCATGGGAA
phaw_30.0049772	13102-13183	RF00005	tRNA	Gene	tRNA	GACGAGGATGAGATTCGAACTCACGCACGGAGACCGTATTGGATTAGCAGTCCAACGCCTTAACCACTCGGCCACCTCGCC
phaw_30.0049772	14914-14985	RF00005	tRNA	Gene	tRNA	CCGTGATCGTATAGTGGTTAGTACATTGCGTTGTGGCCGCAATAACCCAGGTTCGAATCCTGGTCACGGCA
phaw_30.0050942	4072-4153	RF00005	tRNA	Gene	tRNA	GTAGTGTGGCCGAGCGGTCTAAGGCGCTGGTTTAAGGCACCAGTCTCTTCGGAGGCGTGGGTTCGAATCCCACCGCTGCCA
phaw_30.0051185	340-408	RF00005	tRNA	Gene	tRNA	GGCCAGTATGGGGATCGAACCCACGACATCCGCGTTATCAGCACGGTACGCTGTGGTGAACACTAACC
phaw_30.0051294	590-662	RF00005	tRNA	Gene	tRNA	GCCCAACATGGAGCCCGAACCCACGACCTCGAGATGAAGAGTCTCGTGCTCTACCGACTGAGCTAGTTTGGC
phaw_30.0053397	16630-16701	RF00005	tRNA	Gene	tRNA	GCCGTGACCAGGATTCGAACCTGGGTTATTGCGGCCACAACGCAATGTACTAACCACTATACGATCACGGC
phaw_30.0053816	10600-10681	RF00005	tRNA	Gene	tRNA	GGCAGCGGTGGGATTCGAACCCACGCCTCCGAAGAGACTGGTGCCTTAAACCAGCGCCTTAGACCGCTCGGCCACGCTACC
phaw_30.0053830	6545-6617	RF00005	tRNA	Gene	tRNA	GCCCAACGTGGGGCTCGAACCCACGACCCCGAGATTAAGAGTCTCGTGCTCTACCGACTGAGCTAGCCGGGC
phaw_30.0053894	10663-10735	RF00005	tRNA	Gene	tRNA	GACCGTGACAGGACTCGAACCTGCAATCTTCGGATCCGAAGTCCGACGCCTTATCCATTAGGCCACACGGTC
phaw_30.0054356	8177-8249	RF00005	tRNA	Gene	tRNA	ATCTCCAACGGGATTCGAACCCGCGGCCTCTGGATTAGAAGTCCAGCGCGCTATCCACTGCGCCATGGAGAC
phaw_30.0055138	5991-6062	RF00005	tRNA	Gene	tRNA	CCGTGATCGTATAGTGGTTAGTACATTGCGTTGTGGCCGCAATAACCCAGGTTCGAATCCTGGTCACGGCA
phaw_30.0055379	471-531	RF00005	tRNA	Gene	tRNA	NNGTGGTGAGCATAGCTGCCTTCCAAGCAGTTGACCCGGGTTCGATTCCCGGCCATCGCA
phaw_30.0055379	988-1069	RF00005	tRNA	Gene	tRNA	GACGAGGATGGGATTCGAACCCACGCACGGAGACCGTATTGGATTAGCAGTCCAACGCCTTAACCACTCGGCCACCTCGCC
phaw_30.0055712	214-285	RF00005	tRNA	Gene	tRNA	CCTCGGCAGTATAGTGGTGAGTATCCCCGCCTGTCACGCGGGAGACCGGGGTTCGATTCCCCGCCGGGGAG
phaw_30.0059752	7564-7635	RF00005	tRNA	Gene	tRNA	GTCCTGTGGTGTAGTGGTCAGCACATCGGACTCTAAATCCGATGACCCGGGTTCGATCCCCGGCAGGACCT
phaw_30.0061229	379-451	RF00005	tRNA	Gene	tRNA	CCTCCGTGGCCTAATGGATAAGGCATTGGCCTCCTAAGCCAGGGATTGCGGGTTCGAGTCCCGCCGGAGGTT
phaw_30.0061282	1342-1413	RF00005	tRNA	Gene	tRNA	GACCCCAGAGTGACTCGAACACCCAACCTTCTGATCTGGAGTCAGACGCGCTACCATTGCGCCATAGGGCC
phaw_30.0062535	7777-7858	RF00005	tRNA	Gene	tRNA	CTGTGGTGTCCGAGTGGTTAAGGAGATGGACTTGAAATCCATTGGGCTCTGCCCGCACAGGTTCGAACCCTGTCCGCAGCG
phaw_30.0063305	14376-14448	RF00005	tRNA	Gene	tRNA	TGCTTATGGTGTAGTGGTTATCACGTCTGTCTAACACACAGAAGGTCCCTGGTTCGAGCCCAGGTAAGCACA
phaw_30.0064567	75-147	RF00005	tRNA	Gene	tRNA	GCCCAACGTGGGGCTCGAACCCACGACCCCGAGATTAAGAGTCTCGTGCTCTACCGACTGAGCTAGCCGGGC
phaw_30.0064567	355-427	RF00005	tRNA	Gene	tRNA	GCCCAACGTAGGGCTCGAACTCACGACCCCGAGATTAAGAGTCTCGCGCTCTGCCGACTGAGCTAGCCGGGC
phaw_30.0064567	6015-6087	RF00005	tRNA	Gene	tRNA	GCCCAACGTGGGGCTCGAACCCACGACCCCGAGATTAAGAGTCTCGTGCTCTACCGACTGAGCTAGCCGGGC
phaw_30.0064567	6275-6347	RF00005	tRNA	Gene	tRNA	GCCCAACGTGGGGCTCGAACCCACGACCCCGAGATTAAGAGTCTCGTGCTCTACCGACTGAGCTAGCCGGGC
phaw_30.0064567	6566-6638	RF00005	tRNA	Gene	tRNA	GCCCAACGTGGGGCTCGAACCCACGACCCCGAGATTAAGAGTCTCGTGCTCTACCGACTGAGCTAGCCGGGC
phaw_30.0064614	2210-2281	RF00005	tRNA	Gene	tRNA	GTCCTGTGGTGTAGTGGTTAGCACATCGGACTCTAAATCCGATGACCCGGGTTCGATCCCCGGCAGGACCT
phaw_30.0064675	7047-7118	RF00005	tRNA	Gene	tRNA	GGTTCTACCGAGACTCGAACTCGGATTGTTGGATTCAGAGTCCAAAGTGCTAACCATTACACCATAGAACC
phaw_30.0065363	6391-6463	RF00005	tRNA	Gene	tRNA	GCCCAGACCCGGGATCGAACCGGGGACCTTTAGATCTTCAGTCTAACGCTCTCCCAACTGAGCTATCTAGGC
phaw_30.0065628	5482-5563	RF00005	tRNA	Gene	tRNA	GCTGCGGACAGGGTTCGAACCTGTGCGGGCAGAGCCCAATGGATTTCAAGTCCATCTCCTTAACCACTCGGACACCACAGC
phaw_30.0069688	2946-3018	RF00005	tRNA	Gene	tRNA	GCCCAACGTGGGGCTCGAACCCACGACCCCGAGATTAAGAGTCTCGTGCTCTACCGACTGAGCTAGCCGGGC
phaw_30.0070311	1541-1613	RF00005	tRNA	Gene	tRNA	CCCGGCTAGCTCAGTCGGTAGAGCACGAGACTCTTAATCTCGGGGTCGTGGGTTCGAGCCCCACGTTGGGCG
phaw_30.0070311	5981-6052	RF00005	tRNA	Gene	tRNA	CCCGGCTAGCTCAGTTGGTAGAGCACGAGACTCTTAATCTCGGGGTCGTGGGTTCGAGCCCATGTTGGGCG
phaw_30.0070311	6307-6379	RF00005	tRNA	Gene	tRNA	CCCGGCTAGCTCAGTCGGTAGAGCACGAGACTCTTAATCTCGGGGTCGTGGGTTCGAGCCCCACGTTGGGCG
phaw_30.0070311	6619-6691	RF00005	tRNA	Gene	tRNA	CCCGGCTAGCTCAGTCGGTAGAGCACGAGACTCTTAATCTCGGGGTCGTGGGTTCGAGCCCCACGTTGGGCG
phaw_30.0071694	4899-4971	RF00005	tRNA	Gene	tRNA	ACCTCCGGCGGGACTCGAACCCGCAATCCCTGGCTTAGGAGGCCAATGCCTTATCCATTAGGCCACGGAGGC
phaw_30.0071767	1131-1202	RF00005	tRNA	Gene	tRNA	GCGATGGCCGGGAATCGAACCCGGGTCAACTGCTTGGAAGGCAGCTATGCTCACCACTATACCACCATCGC
phaw_30.0073172	5710-5782	RF00005	tRNA	Gene	tRNA	CCTAGATAGCTCAGTTGGGAGAGCGTTAGACTGAAGATCTAAAGGTCCCCGGTTCGATCCCGGGTCTGGGCA
phaw_30.0073490	5956-6027	RF00005	tRNA	Gene	tRNA	TCCCCGGCGGGGAATCGAACCCCGGTCTCCCGCGTGACAGGCGGGGATACTCACCACTATACTACCGAGGA
phaw_30.0073703	1160-1231	RF00005	tRNA	Gene	tRNA	TCCCATGCCGGGAATCGAACCCGGGCCTCCTGGGTGAAAGCCAGGTATCCTAGCCACTAGACCACATGGGA
phaw_30.0074214	15737-15823	RF00005	tRNA	Gene	tRNA	GTCTGTTAGCTCAGTGGCAGAGCACCAGCTGGCTGACTCAGTCAAATATTCGCTGGGGGTCACAAGTTCGATCCTTGTACAGGCTA
phaw_30.0074792	3752-3825	RF00005	tRNA	Gene	tRNA	GCCTGTTAGCTCAGTTGGTTAGAGCACCGTGCTGATAACGTGGATGTCGTGGGTTCGATCCCCATACTGGCCA
phaw_30.0078464	2300-2363	RF00005	tRNA	Gene	tRNA	ACGTGGGGCTCGAACCCACGACCCTGAGATTAAGAGTCTCATGCTCTACCGACTGAGCTAGCT
phaw_30.0079720	1595-1667	RF00005	tRNA	Gene	tRNA	GCCTTGTGGCGCAATGGATAACGCGTCCGCCTACGGAGCGGAAGATTCCAGGTTCGACCCCTGGCAAGGTCG
phaw_30.0079720	2378-2450	RF00005	tRNA	Gene	tRNA	GCCTTGTGGCGCAATGGATAACGCGTCCGCCTACGGAGCGGAAGATTCCAGGTTCGACCCCTGGCAAGGTCG
phaw_30.0081082	289-360	RF00005	tRNA	Gene	tRNA	CCTGTAAGCTCAGTCGGTAAAGCACCAGACTCTTTATCTCGGGGTCGTGGGTTCGTGCCCCACTTTGGGCG
phaw_30.0081358	1573-1644	RF00005	tRNA	Gene	tRNA	CCCGTGTGGTCTAGTGGCTAGGATACGCGGCTCTCACCCGCGAGGCCCGGGTTCAATTCCCGGCACGGGAA
phaw_30.0081358	2646-2717	RF00005	tRNA	Gene	tRNA	CCCGTGTGGTCTAGTGGCTAGGATACGCGGCTCTCACCCGCGAGGCCCGGGTTCAATTCCCGGCACGGGAA
phaw_30.0082765	2432-2504	RF00005	tRNA	Gene	tRNA	GCCTGTAAGCTCAGTCGGTAAAGCACCAGACTCTTTATCTCGGGGTCGTGGGTTCGTGCCCCACTTTGGTCG
phaw_30.0084877	1955-2025	RF00005	tRNA	Gene	tRNA	GCATCGGCTGGGAATCAAACCCAGGCCTCCTGCGTGGCAGGCGAGAATTCTTACACTGAACCACGGATGC
phaw_30.0087579	184-256	RF00005	tRNA	Gene	tRNA	GGAGCTATGCGGGATCGAACCGCAGACCTCCTGCGTGCAAAGCAGGCGCTCTCCCAGCTGAGCTATAGCCCC
phaw_30.0087579	302-375	RF00005	tRNA	Gene	tRNA	AGGCCTGAGTGGACTTGAACCACCGACCTCACCCTTATCAGGGGTGCGCTCTAACCACCTGAGCTACAAGCCT
phaw_30.0087591	966-1024	RF00005	tRNA	Gene	tRNA	CCAGGAATCGAACCCTGGCCTCCTGGACAAAAGCCAGGTATCCTATCCACTAGACCAC
phaw_30.0088331	953-1024	RF00005	tRNA	Gene	tRNA	TCCCCGGCGGGGAATCGAACCCCGGTCTCCCGCGTGACAGGCGGGGATACTCACCACTATACTACCGAGGA
phaw_30.0089207	1960-2027	RF00005	tRNA	Gene	tRNA	CCTCTATAGCTCAGTGGCTAGAGCACTGGTCTTGTAAACCAGGGGTCGGGAGTTCGATCCTCCCTGG
phaw_30.0090889	18264	RF00005	tRNA	Gene	tRNA	ACATTGCGTTGTGGCCGCAATAACCCAGGTTCGAATCCTGGTCACGGCA
phaw_30.0093150	156-226	RF00005	tRNA	Gene	tRNA	TCGCCGCCCGGGAAGCGAACCCGGGTCGCAAGAATGGGAATCTTGCATGATACCACTACACCAGCGGCGC
phaw_30.0093768	600-672	RF00005	tRNA	Gene	tRNA	GTGCTTACCTGGGCTCGAACCAGGGACCTTCTGTGTGTTAGACAGACGTGATAACCACTACACCATAAGCAC
phaw_30.0099328	1142-1213	RF00005	tRNA	Gene	tRNA	CCTCGGTAGTATAGTGGTGAGTATCCCCGCCTGTCACGCGGGAGACCGGGGTTCGATTCCCCGCCGGGGAG
phaw_30.0100676	1138-1209	RF00005	tRNA	Gene	tRNA	GCCGTGACCAGGATTCGAACCTGGGTTATTGCGGCCACAACGCAATGTACTAACCACTATACGATCACGGC
phaw_30.0101258	1346-1418	RF00005	tRNA	Gene	tRNA	CCTTCATAGCTCAGGGGTTAGAGCGCTGGTCTAGTAAACCAGAGGCCGGGAGTTCGATTCTCCCTGAAGGCA
phaw_30.0102947	962-1035	RF00005	tRNA	Gene	tRNA	GCCGGTTAGCTCAGTTGGTTAGAGCGTCGTGCTAATAACGCGAATGTCGTGGGTTCGATCCCCATACTGGCCA
phaw_30.0108586	446-517	RF00005	tRNA	Gene	tRNA	GTTCTATGGTGTAATGGTTAGCACTTTGGACTCTGAATCCAACAATCCGAGTTCGTGTCTCGGTAGAACCT
phaw_30.0113736	13281-13353	RF00005	tRNA	Gene	tRNA	GCCCAACGTGGGGCTCGAAACCACGACCCCGAGATTGAGAGTCTCGTGCTGTACCGACTGAGCTAGCCGGGC
phaw_30.0113736	13608-13679	RF00005	tRNA	Gene	tRNA	GCCCAACATGGGCTCGAACCAACGACCCCGAGATTAAGAGTCTCGTGCTCTACCGACTGAGCTAGCCGGGC
phaw_30.0113736	13934-14005	RF00005	tRNA	Gene	tRNA	GCCCAACATGGGCTCGAACCCACGACCCCGAGATTAAGAGTCTCGTGCTCTACCGACTGAGCTAGCCGGGC
phaw_30.0120923	574-655	RF00005	tRNA	Gene	tRNA	GGCAGCGGTGGGATTCGAACCCACGCCTCCGAAGAGACTGGTGCCTTAAACCAGCGCCTTAGACCGCTCGGCCACGCTACC
phaw_30.0121539	13931-14015	RF00005	tRNA	Gene	tRNA	AGCCTGTACAAGGATCGAACTTGCGACCTCCATCGTGTTCAGAATAGAACCGCTGCTGGTGCTCTGCCACTGAGCTAACAGGCA
phaw_30.0125576	991-1063	RF00005	tRNA	Gene	tRNA	CCTCGGTAGCGCAGTAGGCAGCGCGTCAGTCTCATAATCTGAAGGTCGTGAGTTCGATCCTCACTCGGGGCA
phaw_30.0136573	246-317	RF00005	tRNA	Gene	tRNA	GCAGAGTGGCGCAGAGGAAGCGTGCTGGGCCCATAACCCAGAGGTCCGTGGATCGAAACCACGCTCTGCTA
phaw_30.0147144	20-92	RF00005	tRNA	Gene	tRNA	ACCTCCGGCGGGACTCGAACCCGCAATCCTCGGCTTAGGAGGCCGATGCCTTATCCATTGGGCCACGGAGGC
phaw_30.0149968	815-874	RF00005	tRNA	Gene	tRNA	GGAGCTGCGGGGCATCGATCCCCGTACCTCTCGCATGCTAAGCGAGCGCTCTACCATTT
phaw_30.0152546	64-135	RF00005	tRNA	Gene	tRNA	AGCAGAGCGTGGTTTCGATCCACGGACCTCTGGGTTATGGGCCCAGCACGCTTCCTCTGCGCCACTCTGCT
phaw_30.0158596	216-288	RF00005	tRNA	Gene	tRNA	CCTCCGTGGCCTAATGGATAAGGCATTGGCCTCCTAAGCCAGGGATTGCGGGTTCGAGTCCCGCCGGAGGTT
phaw_30.0175293	281-353	RF00005	tRNA	Gene	tRNA	GCCACCAGGGAGATTCGAACTCCCGGCCTCTGGTTTACAAGACCAGCGCTCTAACCCCTGAGCTATGGAGGC
phaw_30.0184435	202-257	RF00005	tRNA	Gene	tRNA	GTATAGTGGTGAGTATCCCCGCCTGTCACGCGGGAGACCGGGGTTCGATTCCCCG
phaw_30.0197796	507-588	RF00005	tRNA	Gene	tRNA	CTGTGGTGTCCGAGTGGTTAAGGAGATGGACTAGAAATCCATTGGGCTCTGCCCGCACAGGTTCGAATCCTGTCTACAGCG
phaw_30.0205309	245-317	RF00005	tRNA	Gene	tRNA	CCCGGCTAGCTCAGTCGGTAGAGCACGAGACTCTTAATCTCGGGATCGTGGGTTCGTGCCCCACGTTGGGCG
phaw_30.0209926	498-558	RF00005	tRNA	Gene	tRNA	GCGGGGAATCGAACCCCGGTCTCCCGCGTGACATGCGGGGATTCTCACCACTATACTACC
phaw_30.0231425	206-276	RF00005	tRNA	Gene	tRNA	CATCGGTGGTTCAGTGGTAGAATTCTCGCCTGCCACGCGGGAGGCCCGGGTTCGATTCCCGGCCGATGCA
phaw_30.0245980	24473	RF00005	tRNA	Gene	tRNA	TGGCGCAATGGATAACGCGTCCGCCTACGGAGCGGAAGATTCCAGGTTCGACCCCTGGCAAGGTCG
phaw_30.0280616	168-256	RF00005	tRNA	Gene	tRNA	GCCCCAGGTGAGGCTCGAACTCACAACCTCGGCATAGCTCAATACTGTCGTATAAGTACCGCGCGCTAACCGATTGCGCCACTGGGGC
phaw_30.0301313	116-188	RF00005	tRNA	Gene	tRNA	TCCGGCTAGCTCAGTCGGTAGAGCACGAGACTCTTAATCTCGGGGTCGTGGGTTCGAGCCCCACGTTGGGCG
phaw_30.0315913	194-266	RF00005	tRNA	Gene	tRNA	GTCCCCTAGGGGATTCGAACCCCTGTTACCGCCGTGAAAGGGCGGTGTCCTGGGCCTCTAGACGAAGGGGAC
phaw_30.0320339	127-208	RF00005	tRNA	Gene	tRNA	GGCAGCGGTGGGATTCGAACCCACGCCTCCGAAGAGACTGGTGCCTTAAACCAGCGCCTTAGACCGCTCGGCCACGCTACC
phaw_30.0328019	153-225	RF00005	tRNA	Gene	tRNA	GGCCCTTGCTGGACTTGAACCAGCGACCAAGCGATTATGAGTCGCCTGCTCTAACCACTGAGCTAAAGGGCC
phaw_30.0329147	30-101	RF00005	tRNA	Gene	tRNA	GGCTTGACCGGGATTTGAACCCGGGACCTCTCGCACCCAAAGCGAGAATCATACCCCTAGACCATCAAGCC
phaw_30.0333056	116-188	RF00005	tRNA	Gene	tRNA	CCCGGCTAGCTCAGTCGGTAGAGCACGAGACTCTTAATCTCGGGGTCGTGGGTTCGAGCCCCACGTTGGGCG
phaw_30.0334807	118-189	RF00005	tRNA	Gene	tRNA	CCTCGGTAGTATAGTGGTGAGTATCCCCGCCTGTCACGCGGGAGACCGGGGTTCGATTCCCCGCCGGGGAG
phaw_30.0335852	130-203	RF00005	tRNA	Gene	tRNA	GCCGGTTAGCTCAGTTGGTTAGAGCGCCGTGCTGATAACGCGGATGTCGTGGGTTCGATCCCCATACTGGCCA
phaw_30.0339985	129-186	RF00005	tRNA	Gene	tRNA	CCGGGAAACGAACCCGGGCCTCCCGCGTGGCAGGCGAGAATTCTACCACTGAACCAC
phaw_30.0342636	105-177	RF00005	tRNA	Gene	tRNA	GCCCAACGTGGGGCTCGAACCCACGACCCCGAGATTAAGAGTCTCGTGCTCTACCGTCTGAGCTAGCCGGGC
phaw_30.0344580	118-176	RF00005	tRNA	Gene	tRNA	AGCTCAGTCGGTTAGAGCGCCGTGCTGATAACGCGGATGTCGTGGGTTCGTTCCCCAT
phaw_30.0361840	218-273	RF00005	tRNA	Gene	tRNA	GCCGTTTAGCTCAGTCGGTTAGAGCGCCGTGCTGATAACGCGGATGTCGTGGGTT
phaw_30.0368928	114-187	RF00005	tRNA	Gene	tRNA	GGCCAGTATGGGGAACGAACCCACGACATCCGCGTTATCAGCACGGCGCTCTAACCAACTGAGCTAACCGGCC
phaw_30.0058483	5121-5166	RF00032	Histone3	Gene	Cis-reg	TTAGTAGTTGTTAATAGTATTAGTAGTTGTTAGAACAACCTCTGG
phaw_30.0011329	13234-13279	RF00032	Histone3	Gene	Cis-reg	TTCAGGCTTTTCTGAAAGCCACTATATACATATATATATATATAT
phaw_30.0002348	26771-26816	RF00032	Histone3	Gene	Cis-reg	TTCTGGCTCTCTTTAGAGCCAAATAATATATTACTGAAAATTTTC
phaw_30.0002348	103368-103413	RF00032	Histone3	Gene	Cis-reg	TTCTGGCTCTCTTTAGAGCCAAATAATATATTACTGAAAATTTTC
phaw_30.0009632	33806-33918	RF00485	K_chan_RES	Gene	Cis-reg	TTGCTGACGATGACAGGTACAGGTAAGGCAATGACGAGCACACCTGAGAGAGAACAGACGCCTCCTACGATCTTGCCCATGGGTGTGTGTGGTACCATGTCACCGTACCTGG
phaw_30.0009605	27284-27381	RF00485	K_chan_RES	Gene	Cis-reg	TTGGACACGATGACAGGCACAGGCAGAGCGATGGTCAGCACACCTGCTATGGCACACAGGGACCCCACCACCTTACCCCACACCCCCACCGGCCTGT
phaw_30.0003854	60153-60250	RF00485	K_chan_RES	Gene	Cis-reg	TTGGACACGATGACAGGCACAGGTAGAGCGATGGTCAGCACACCTGCTATGGCACACAGGGACCCCACCACCTTCCCCCACACCCCCACCGGCCTGT
phaw_30.0005035	183830-183943	RF00485	K_chan_RES	Gene	Cis-reg	TTGGACACGATGACTGGTACTGGGAGTGCGATGGTGAGTACACCCGCCAAGGCACACAGGGCACCCACGAACATGCCCACGTACGTTTTGGGTACCATGTCACCGTACCCCAC
phaw_30.0005192	260269-260382	RF00485	K_chan_RES	Gene	Cis-reg	TTGGATACGGTGACATGGTACCACGGACCTACGCCGGCATGTTCGTAGGTACTCTGTGCGCCATAGCTGGAGTGCTAACCATCTCCCTGCCCGTTCCTGTTATTGTGTCCAAC
phaw_30.0006385	16473-16586	RF00485	K_chan_RES	Gene	Cis-reg	TTGGTTACGGTGACATGGTACCACGGACCTACGCCGGCATGTTCGTAGGTACTCTGTGCGCCATAGCTGGAGTGCTAACCATCTCCCTACCCGTTCCTGTTATTGTGTCCAAC
phaw_30.0006076	56506-56619	RF00485	K_chan_RES	Gene	Cis-reg	TTGTTGACGATGATAGGAATAGGCAGCGCAATGACCAACACACCACAAATACAGCATACCGAACCTATCACCTTGCCAAGGGGAGTTTCTGGGTACACGTCACCATAACCTAC
phaw_30.0004712	129902-129998	RF00679	miRNA	Gene	mir-210	GCGATGCTAAGTAACCACCACAATAGCTGATGTCACACGCACAAGAGTTTTTAAATCTAATCTTGTGCATTGTCCAGCAGCTGTAATGGGGTTACA
phaw_30.0022770	16508-16604	RF00857	miRNA	Gene	mir-282	TCCGACACCCCTATGTTCCGATACCTCTATGTTCCAACACCTAACCTAACATAGGGGTGTCGGAACATAGGGGTGTCGGAACATAGGGGTGTCGGA
phaw_30.0029018	25768-25869	RF00857	miRNA	Gene	mir-282	AAGGGCATCCCTATGTTCCGACACCCCTATGTTCCGACACCTAACCTAACCTAACATAGGGGTATCGGAACATAGGGGTGTCGGAACATAGGGGTGTCGAA
phaw_30.0005688	29583-29672	RF00706	miRNA	Gene	mir-263	TGTGACAGCCTCGGTGTGGCACCAAAGAATCACGGGGATCAAAAAAACGACCCGTGAATTCTTCCAGTGCCATTCCAAGACAGTCACAA
phaw_30.0024737	22913-23002	RF00706	miRNA	Gene	mir-263	TGTGACAGCCTCGGTGTGGCACCAAAGAATCACGGGGATCAAAAAAACGACCCGTGAATTCTTCCAGTGCCATTCCAAGACAGTCACAA
phaw_30.0058402	8121-8220	RF00789	miRNA	Gene	mir-285	TTCGGGAATAAAATTTCGTAATAGCCCTAATCACTGAATTAAAATTGTCGACAATTTTAATACAGTGATTAGCGCTAATACGAAATTTTATTCTCGAAT
phaw_30.0017284	7716-7792	RF00824	miRNA	Gene	mir-190	CCCTTCATGCGCTGGTACGCTTGATGTTCTTGGTAATTGGCCACACATCAAGCGTACCAGCGCATGAAGGGAATCA
phaw_30.0030185	8967-9051	RF00672	miRNA	Gene	mir-190	CACTGGTTGATAATAATATGTTCGATTCTCAGTCGAATATAAACAACAACCAAGAATATCAAACATATCTCACCAACACAGCGA
phaw_30.0013543	62818-62872	RF00844	miRNA	Gene	mir-307	CACTCACTCAAGGAGGTTGTGATGGTGGAGCACCACGACCAAGTTGAGTGAGGC
phaw_30.0026191	512-566	RF00844	miRNA	Gene	mir-307	CACTCACTCAAGGAGGTTGTGATGGTGGAGCACCACGACCAAGTTGAGTGAGGC
phaw_30.0000348	193854-193920	RF00047	miRNA	Gene	mir-2	TACGCTCATCAAAGCTGGCTGTGATATGTACATAGTAACGCATAGCACAGCCACTCTGAGGAGGGC
phaw_30.0040202	1680-1746	RF00047	miRNA	Gene	mir-2	GAGCCGTCAAAGTGAGTGTGACGCGCTGTTCTTGGGTCGTATCACAGCCACCTTTGATGAGCTCCG
phaw_30.0040202	5755-5821	RF00047	miRNA	Gene	mir-2	CCCTCCTCAGAGTGGCTGTGCTATGCGTTACTATGTACATATCACAGCCAGCTTTGATGAGCGTAG
phaw_30.0009816	2825-2913	RF00727	miRNA	Gene	bantam	TTTTATCACGAGACTGGTTTTCATAATGATTTGCCAGATGTTTATGTTTCTGAGATCATTGTGAAAGCTGATTTCGTACTATATGCGG
phaw_30.0018588	39639-39718	RF00027	miRNA	Gene	let-7	CTGATTCAGGCAGGATGTTGTACACCATGACTGATTAGACTTAATCAGTCATGGTGTACAACATCCTGCCTAAATCAGT
phaw_30.0004823	113070-113142	RF00027	miRNA	Gene	let-7	CCAGTGAGGTAGTAGGTTGTATGGTTAAGTACTACATCAAAGGAGAACCTTACAGCTTGCTAACTTTCTGGG
phaw_30.0007978	62410-62485	RF00103	miRNA	Gene	mir-1	TCGCAGCTCCGTACTTCATTACGTCGCCATACTGTTATTTAGTCTATGGAATGTAAAGAAGTATGGAGTGGCGAG
phaw_30.0000947	100581-100653	RF00104	miRNA	Gene	mir-10	CCACACGAACCTCTCTAGAACCGAATTTGTTCACTATTTTCCCACAAATTCGGATCTACAGGGTAGATGTAG
phaw_30.0001203	168091-168163	RF00104	miRNA	Gene	mir-10	TACATCTACCCTGTAGATCCGAATTTGTGGGAAAATAGTGAACAAATTCGGTTCTAGAGAGGTTCGTGTGGT
phaw_30.0004823	103838-103909	RF00104	miRNA	Gene	mir-100	TTGTCTGCACCCGTAGATCCGAACTTTCGTGTTGAGGTGACCGCAAGTTAGGTTCTACGGGTACAGTCAGG
phaw_30.0019975	31314-31382	RF00104	miRNA	Gene	mir-993	CGCAAGATACCTGTAGAAACGAGCTTCTGATTATACTACAAAAGCCCGGATATACAGGGTAGATTACG
phaw_30.0006836	26690-26766	RF00239	miRNA	Gene	mir-124	TGGTGCAGTTGGTGTTCGCTGAGAGCTTTGTGTGTACTGCGTCATAAGGCACGCGGTGAATGCCAACTGCGCCAGA
phaw_30.0029645	33671-33755	RF00446	miRNA	Gene	mir-133	GTGCAGTGGCATAGCTGGCTGACAGAGGGTCAAATTGTATTAGCGTATTTGGTCCCCTTCAACCAGCTGTGATGGCTGCACCCC
phaw_30.0045508	10208-10292	RF00446	miRNA	Gene	mir-133	GTGCAGTGGCATAGCTGGCTGACAGTGGGTCAAATTGTTTAAGTGTATTTGGTCCCCTTCAACCAGCTGTGATGGCTGCACCCC
phaw_30.0026134	9938-10051	RF00694	miRNA	Gene	mir-137	CATTAATCATACACTTGAATACGTGTGTACTAGGTCATTTAATTTAATTGGCTAATTAACTGCCGCGTGATTAATGACCTAGTACACACGTATTCAAGTGTATGATTATATCA
phaw_30.0004548	150525-150605	RF00657	miRNA	Gene	mir-184	AGCTCACTAGCCCTTATCAGTTCTCCGTCCAGTGCTCAGATAACAACTGAGGCGAAGAAGAGATAAGGATATGTGAGAGC
phaw_30.0017013	14988-15068	RF00657	miRNA	Gene	mir-184	AGCTCACTAGCCCTTATCAGTTCTCCGTCCAGTGCTCAGATAACAACTGAGGCGAAGAAGAGATAAGGATATGTGAGAGC
phaw_30.0027622	25789-25868	RF00657	miRNA	Gene	mir-184	CCATCACAAGCCCTTATCAGTTCTCCGTCCAGTGGCGATAACAGACTGGGTGGTAGAATTGATAAGGAAACGTAAGGAG
phaw_30.0031895	3889-3968	RF00657	miRNA	Gene	mir-184	TCCTCACGTTTCCTTATCAATTCTACCACCCAGTCTGTTATCGCCACTGGACGGAGAACTGATAAGGGCTTGTGATGGA
phaw_30.0008909	53837-53900	RF00251	miRNA	Gene	mir-219	ACAGAGATGTCCCCACACAACTCTTGGCAAAATCACAAGAATTGCGTTTGGACAATCAGTGCC
phaw_30.0011353	27902-27965	RF00251	miRNA	Gene	mir-219	GCACTGATTGTCCAAACGCAATTCTTGTGATCTTGCCAAGAGTTGTGTGGGGACATCTCTGTT
phaw_30.0014117	40623-40711	RF00637	miRNA	Gene	mir-276	TTGATCTCGGCGAGCAGCGAGGTATGGAGTTCCTACGCGTAGTATTCCGTAGGAACTTCATACCGTGCTCTTCGTGCGAGCATCTCTT
phaw_30.0002741	11762-11826	RF00667	miRNA	Gene	mir-33	CGTGATGCATTGTAGTTGCATTGCAGAGGCTTATGTCCTGCAGTGCTTCTGCAGCGCAGCACGG
phaw_30.0013945	33820-33884	RF00667	miRNA	Gene	mir-33	CGTGATGCATTGTAGTTGCATTGCAGAGGCTTATGTCCTGCAGTGCTTCTGCAGCGCAGCACGG
phaw_30.0018694	48308-48393	RF00711	miRNA	Gene	mir-34	AAAGGCGCAGAGGGCGGCAGTGAAGTAGATGGCTGTGCCTGTAACTCACAACCAGCTAACCACACTGCCAAACTCTTACGCCTGT
phaw_30.0005273	184582-184651	RF00249	miRNA	Gene	mir-46	TCCATAAAGAGAGCAACTCCATGACAGTTAATTCAAGTCAATACTGTCGACGGATAGCTCTCTTCATAG
phaw_30.0015531	16276-16345	RF00249	miRNA	Gene	mir-46	TCCATAAAGAGAGCAACTCCATGACAGTTAATTCAAGTCAATACTGTCGACGGATAGCTCTCTTCATAG
phaw_30.0040202	1317-1375	RF00832	miRNA	Gene	mir-71	GAAAGACATGGGTAGTGAGATGTAAGTTTCATTTCACATCTCACTACCTTGTCTTTCA
phaw_30.0005076	24231-24305	RF00241	miRNA	Gene	mir-8	GTGAGCTTACATCATTACCTGACAGTATTAGGTTCATAATCATCCTAATGCTGTCCGGTAAGATGTGGCCAGCA
phaw_30.0116118	641-700	RF00237	miRNA	Gene	mir-9	ACTTTGGTAACCTAGCTTTATGACGCTAGAATCTCTCATACAGCTAGATAACCAAAGAG
phaw_30.0001222	62044-62103	RF00237	miRNA	Gene	mir-9	ACTTTGGTAACCTAGCTTTATGACGCTAGAATCTCTCATACAGCTAGATAACCAAAGAG
phaw_30.0001739	149568-149652	RF00725	miRNA	Gene	mir-iab-4	CGGTACCTCCTGGACGTATACTGAATGTATCCTGAGGGAAAACTAGTCCGGTATACCTTCAGTATACGTAGCAGGAGATGCCAC
