# Supplementary material for: The genome of the crustacean Parhyale hawaiensis, a model for animal development, regeneration, immunity and lignocellulose digestion
Source: eLife. 2016 Nov 16;5:e20062. doi: 10.7554/eLife.20062 (PMC5111886; doi:10.7554/eLife.20062)
Supplement: Figure 15—source data 1. — Catalog of Parhyale genes involved in DNA methylation and histone modifications. DOI: http://dx.doi.org/10.7554/eLife.20062.043 [file elife-20062-fig15-data1.xlsx]

## Sheet: Sheet1
DNA methyltransferases
	P. hawaiensis gene ID
DNMT1	phaw_30_tra_m.006850
DNMT2	phaw_30_tra_m.019340
DNMT3	phaw_30_tra_m.012518
TET proteins
	P. hawaiensis gene ID
TET1 - methylcytosine dioxygenase	-
TET2	phaw_30_tra_m.018147
TET3	-
Methyl-CpG Binding Domain proteins
	P. hawaiensis gene ID
MBD1	-
MBD2/3	phaw_30_tra_m.002736
MBD4	phaw_30_tra_m.003543
Histone modifying genes
	Histone	Site	Histone-modifying enzymes	Function	P. hawaiensis gene ID
Acetylation	H2A	Lys4	Esa1	transcriptional activation	-
		Lys5	Tip60	transcriptional activation	phaw_30_tra_m.022967
			p300/CBP	transcriptional activation	phaw_30_tra_m.018772
		Lys7	Hat1	unknown	phaw_30_tra_m.010682
	H2B	Lys5	p300, ATF2	transcriptional activation	phaw_30_tra_m.018772
		Lys11	Gcn5	transcriptional activation	phaw_30_tra_m.024630
		Lys12	p300/CBP	transcriptional activation	phaw_30_tra_m.018772
			ATF2	transcriptional activation	phaw_30_tra_m.000231
		Lys15	p300/CBP	transcriptional activation	phaw_30_tra_m.018772
			ATF2	transcriptional activation	phaw_30_tra_m.000231
		Lys16	Gcn5, Esa1	transcriptional activation	phaw_30_tra_m.024630
		Lys20	p300	transcriptional activation	phaw_30_tra_m.018772
	H3	Lys4	Esa1	transcriptional activation	-
		Lys9	Gcn5	transcriptional activation	phaw_30_tra_m.024630
			SRC-1		phaw_30_tra_m.011259
		Lys14	Gcn5	transcriptional activation	phaw_30_tra_m.024630
			PCAF	transcriptional activation	phaw_30_tra_m.024630
			Esa1, Tip60	transcriptional activation, DNA repair	phaw_30_tra_m.022967
			SRC-1	transcriptional activation	phaw_30_tra_m.011259
			Elp3	transcriptional activation	phaw_30_tra_m.004551
			TAF1	RNA polymerase II transcription	phaw_30_tra_m.010259
			Sas2	euchromatin	-
			Sas3	transcriptional activation	-
			p300	transcriptional activation	phaw_30_tra_m.018772
		Lys18	Gcn5	transcriptional activation, DNA repair	phaw_30_tra_m.024630
			p300/CBP	DNA replication, transcriptional activation	phaw_30_tra_m.018772
		Lys23	Gcn5	transcriptional activation, DNA repair	phaw_30_tra_m.024630
			Sas3	transcriptional activation	-
			p300/CBP	transcriptional activation	phaw_30_tra_m.018772
		Lys27	Gcn5	transcriptional activation	phaw_30_tra_m.024630
		Lys36	Gcn5	transcriptional activation	phaw_30_tra_m.024630
		Lys56	Spt10	transcriptional activation	-
	H4	Lys5	Hat1	histone deposition	phaw_30_tra_m.010682
			Esa1, Tip60	transcriptional activation, DNA repair	phaw_30_tra_m.022967
			ATF2	transcriptional activation	phaw_30_tra_m.000231
			p300	transcriptional activation	phaw_30_tra_m.018772
		Lys8	Gcn5, PCAF	transcriptional activation	phaw_30_tra_m.024630
			Esa1, Tip60	transcriptional activation, DNA repair	phaw_30_tra_m.022967
			ATF2	transcriptional activation	phaw_30_tra_m.000231
			Elp3	transcriptional activation	phaw_30_tra_m.004551
			p300	transcriptional activation	phaw_30_tra_m.018772
		Lys12	Hat1	histone deposition, telomeric silencing	phaw_30_tra_m.010682
			Esa1, Tip60	transcriptional activation, DNA repair	phaw_30_tra_m.022967
			p300	transcriptional activation	phaw_30_tra_m.018772
		Lys16	Gcn5	transcriptional activation	phaw_30_tra_m.024630
			MOF (Kat8)	transcriptional activation	phaw_30_tra_m.023931
			Esa1, Tip60	transcriptional activation, DNA repair	phaw_30_tra_m.022967
			ATF2	transcriptional activation	phaw_30_tra_m.000231
			Sas2	euchromatin	-
		Lys91	Hat1	chromatin assembly	phaw_30_tra_m.010682
			Hat2	chromatin assembly	phaw_30_tra_m.000110
	Histone	Site	Histone-modifying enzymes	Function	Transcriptome ID
Methylation	H1	Lys26	Ezh2	transcriptional silencing	phaw_30_tra_m.010807
	H2A	Arg3	PRMT1	transcriptional activation, repression	phaw_30_tra_m.014029
		Arg3	PRMT5	transcriptional activation, repression	phaw_30_tra_m.018088
		Arg3	PRMT6	transcriptional activation, repression	phaw_30_tra_m.006813
		Arg3	PRMT7	transcriptional activation, repression	phaw_30_tra_m.010023
	H3	Arg2	PRMT5	transcriptional repression	phaw_30_tra_m.018088
		Arg2	PRMT6	transcriptional repression	phaw_30_tra_m.006813
		Arg8	PRMT5	transcriptional activation, repression	phaw_30_tra_m.018088
		Arg8	PRMT6	transcriptional activation, repression	phaw_30_tra_m.006813
		Arg17	CARM1	transcriptional activation	phaw_30_tra_m.000659
		Arg26	CARM1	transcriptional activation	phaw_30_tra_m.000659
		Arg42	CARM1	transcriptional activation	phaw_30_tra_m.000659
		Lys4	Set1	permissive euchromatin (di-Me)	phaw_30_tra_m.018398
			Set7/9	transcriptional activation (tri-Me)	-
			MLL, ALL-1	transcriptional activation	phaw_30_tra_m.022973
			Ash1	transcriptional activation	phaw_30_tra_m.019848
		Lys9	Suv39h, Clr4	transcriptional silencing (tri-Me)	phaw_30_tra_m.010876
			G9a	transcriptional repression genomic imprinting	phaw_30_tra_m.022888
			SETDB1	transcriptional repression (tri-Me)	phaw_30_tra_m.021455
			Dim-5, Kryptonite	DNA methylation (tri-Me)	-
			Ash1	transcriptional activation	phaw_30_tra_m.019848
		Lys27	Ezh2	transcriptional silencing, X inactivation (tri-Me)	phaw_30_tra_m.010807
			G9a	transcriptional silencing	phaw_30_tra_m.022888
		Lys36	Set2	transcriptional activation	phaw_30_tra_m.010304
		Lys79	Dot1	euchromatin, transcriptional activation, checkpoint response	phaw_30_tra_m.019417
	H4	Arg3	PRMT1/6	transcriptional activation	phaw_30_tra_m.018088
			PRMT5/7	transcriptional repression	phaw_30_tra_m.006813
		Lys20	PR-Set7	transcriptional silencing (mono-Me)	phaw_30_tra_m.015252
			Ash1	transcriptional activation	phaw_30_tra_m.019848
			Set9	checkpoint response	-
	Histone	Site	Histone-modifying enzymes	Function	Transcriptome ID
Phosphorylation	H2A	Ser1	MSK1	transcriptional repression	phaw_30_tra_m.022738
		Ser129	ATR, Tet1	DNA repair	phaw_30_tra_m.013958
		Ser139 (H2A.X)	ATR	DNA repair	phaw_30_tra_m.013958
		Ser139 (H2A.X)	ATM	DNA repair	phaw_30_tra_m.014201
		Thr119	NHK1	mitosis	phaw_30_tra_u.022755
		Thr120	Bub1	mitosis, transcriptional repression	phaw_30_tra_m.000948
		Thr120	VprBP	mitosis, transcriptional repression	phaw_30_tra_m.011427
		Thr142	WSTF	apoptosis, DNA repair	phaw_30_tra_m.023202
	H2B	Ser10	Ste20	apoptosis	phaw_30_tra_m.019351
		Ser14	Mst1	apoptosis	phaw_30_tra_m.007431
		Ser33	TAF1	DNA repair	phaw_30_tra_m.010259
		Ser36	AMPK	transcriptional activation	phaw_30_tra_m.014995
	H3	Ser10	Aurora-B kinase	mitosis, meiosis	phaw_30_tra_m.019527
			MSK1, MSK2	immediate-early gene activation	phaw_30_tra_m.022738
			IKK-alpha	transcriptional activation	phaw_30_tra_m.001667
			Snf1	transcriptional activation	phaw_30_tra_m.014995
		Ser28 (mammals)	Aurora-B kinase	mitosis	phaw_30_tra_m.019527
			MSK1, MSK2	immediate-early gene activation	phaw_30_tra_m.022738
		Thr3	Haspin/Gsg2	mitosis	phaw_30_tra_m.019692
		Thr6	PKCB1	unknown	phaw_30_tra_m.000319
		Thr11	Dlk/Zip	mitosis	-
		Tyr41	JAK2	transcriptional activation	phaw_30_tra_m.022909
		Tyr45	PKCdelta	apoptosis	phaw_30_tra_m.022819
	H4	Ser1	CK2	DNA repair	phaw_30_tra_m.014071
	Histone	Site	Histone-modifying enzymes	Function	Transcriptome ID
Ubiquitylation	H2A	Lys119 (mammals)	Ring2	spermatogenesis	phaw_30_tra_m.007071
	H2B	Lys120	UbcH6	meiosis	phaw_30_tra_m.003287
		Lys123	Rad6	transcriptional activation, euchromatin	phaw_30_tra_m.010213
	Histone	Site	Histone-modifying enzymes	Function	Transcriptome ID
Sumoylation	H2A	Lys126	Ubc9	transcriptional repression	phaw_30_tra_m.020383
	H2B	Lys6 or Lys7	Ubc9	transcriptional repression	phaw_30_tra_m.020383
	H4	N-terminal tail	Ubc9	transcriptional repression	phaw_30_tra_m.020383
